# Supplementary material for: Chromic properties of dibenzo[ j , l ]fluoranthenes exhibiting different resonance contributions
Source: Royal Society of Chemistry journal article supplement (doi:10.1039/d4ob00750f), 2024-01-01
Supplement: d4ob00750f1.pdf [file d4ob00750f1.pdf]

## Supporting Information

### Chromic Properties of Dibenzo[*j,l*]fluoranthenes Exhibiting Different Resonance Contribution

Kazuma Kurokawa,<sup>a</sup> Naoki Ogawa,<sup>a</sup> Yusuke Kuroda,<sup>a</sup> Yousuke Yamaoka,<sup>a</sup> Hiroshi Takikawa,<sup>a</sup> Kazunori Tsubaki<sup>b</sup> and Kiyosei Takasu\*<sup>a</sup>

<sup>a</sup>Graduate School of Pharmaceutical Sciences, Kyoto University, Yoshida, Sakyo-ku, Kyoto 606-8501, Japan

<sup>b</sup>Graduate School for Life and Environmental Sciences, Kyoto Prefectural University, 1-5 Shimogamo Hangi-cho, Sakyo-ku, Kyoto 606-8522, Japan

E-mail: takasu.kiyosei.6r@kyoto-u.ac.jp; Fax: +81 75 753 4604; Tel: +81 75 753 4553

### Table of Contents

|                                                                                                                  |      |
|------------------------------------------------------------------------------------------------------------------|------|
| 1. Synthesis of Hydroxyfluoranthenes <b>2</b> and <b>3</b>                                                       | S2   |
| 2. X-ray crystallographic data                                                                                   | S10  |
| 3. UV-vis absorption spectra of <b>2</b> and <b>3</b> in CH <sub>2</sub> Cl <sub>2</sub> under acidic conditions | S12  |
| 4. Solvatochromic properties of <b>2c</b> and <b>3c</b> in EtOH                                                  | S15  |
| 5. HOMA Calculation                                                                                              | S17  |
| 6. Computational results                                                                                         |      |
| 6-1. Frontier molecular orbitals and energy levels of <b>2b</b> and <b>3b</b>                                    | S18  |
| 6-2. TD-DFT calculations                                                                                         | S19  |
| 6-3. NICS calculations                                                                                           | S22  |
| 6-4. Calculated bond lengths                                                                                     | S25  |
| 7. <sup>1</sup> H and <sup>13</sup> C NMR spectra                                                                | S73  |
| 8. References                                                                                                    | S101 |

## 1. Synthesis of Hydroxydibenzofluoranthenes 2 and 3

### General

All non-aqueous reactions were carried out in dried glassware under an atmosphere of dry argon unless otherwise noted. For reactions that require heating, oil bath was used as a heat source. *N,N*-Dimethylformamide (DMF) for reaction solvent was dried over molecular sieves 4Å prior to use. All other dehydrated solvents for the reactions were purchased and used without further desiccation. All reagents were purchased and used without further purifications. Analytical TLC was performed on pre-coated silica gel plate (Wako Silicagel 70 F<sub>254</sub>). Column chromatography was performed on Wakogel 60 N unless otherwise stated. <sup>1</sup>H, <sup>13</sup>C NMR spectra were recorded on a JEOL JNM ECZ600R at 600 and 151 MHz, respectively. Chemical shifts ( $\delta$ ) and coupling constants ( $J$ ) are presented in parts per million and hertz, respectively. Tetramethylsilane ( $\delta$  0.0 ppm), acetone-d<sub>6</sub> ( $\delta$  2.04 ppm) and DMSO-d<sub>6</sub> ( $\delta$  2.49 ppm) were used as internal standard for <sup>1</sup>H NMR. Residual CDCl<sub>3</sub> ( $\delta$  77.0 ppm), acetone-d<sub>6</sub> ( $\delta$  29.8 ppm) and DMSO-d<sub>6</sub> ( $\delta$  39.5 ppm) were used as internal standard for <sup>13</sup>C NMR. Multiplicities are indicated as s (singlet), d (doublet), t (triplet), sep (septet), m (multiplet), and br (broad). High-resolution mass spectra (HRMS) were recorded on a Shimadzu LCMS-IT-TOF fitted with an electrospray ionization (ESI) source. IR spectra were recorded on a Shimadzu IRAffinity-1, and the wave numbers of maximum absorption peaks are reported in cm<sup>-1</sup>. X-Ray single crystal diffraction analyses were performed on a Rigaku XtaLAB P200 apparatus. UV-vis absorption spectra were recorded on a Shimadzu UV-2600. Fluorescence spectra were recorded on a JASCO FP-8600.

### Preparation of Substrate 1b

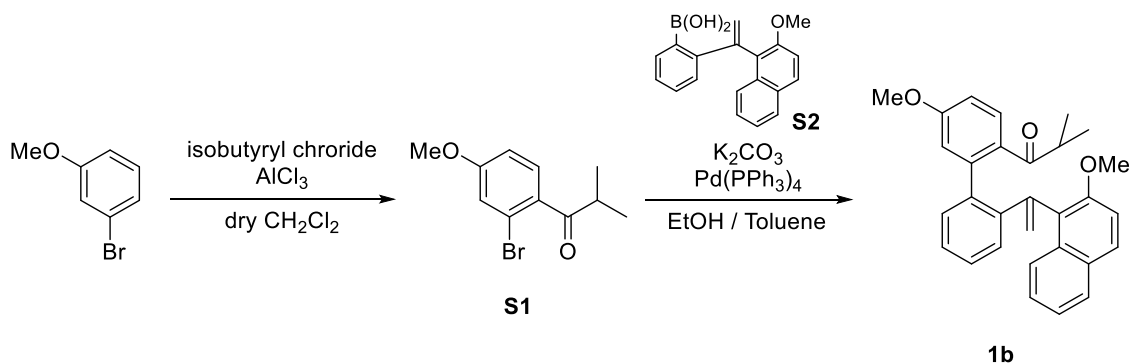

To a solution of 3-bromoanisole (12.5 mL, 99.6 mmol) and AlCl<sub>3</sub> (16.0 g, 120 mmol) in dry CH<sub>2</sub>Cl<sub>2</sub> (110 mL) was added dropwise isobutyryl chloride (12.5 mL, 118 mmol) at 0 °C. After stirring for 18 h at room temperature, the reaction mixture was poured into ice/10% HCl aq. The mixture was extracted three times with Et<sub>2</sub>O. The combined organic extracts were washed with water, sat. NaHCO<sub>3</sub> and brine, dried over Na<sub>2</sub>SO<sub>4</sub> and concentrated. The residue was purified by silica gel column chromatography (hexane/EtOAc = 7/1–5/1) to afford S1 (4.59 g, 18%) as pale yellow oil.

**S1:** *R*<sub>f</sub> 0.58 (hexane/EtOAc = 3.5/1); <sup>1</sup>H NMR (600 MHz, CDCl<sub>3</sub>)  $\delta$  1.18 (d, 6H,  $J$  = 7.2 Hz), 3.39 (sep, 1H,  $J$  = 7.2 Hz), 3.83 (s, 3H), 6.87 (dd, 1H,  $J$  = 8.4, 3.0 Hz), 7.14 (d, 1H,  $J$  = 3.0 Hz), 7.35 (d, 1H,  $J$  = 8.4 Hz) ppm; <sup>13</sup>C NMR (151 MHz, CDCl<sub>3</sub>)  $\delta$  18.4, 39.4, 55.6, 113.1, 119.0, 120.4, 130.0, 133.5, 161.2, 207.3 ppm; IR (film) 3970, 2936, 2870, 2839, 1693, 1593 cm<sup>-1</sup>; HRMS–ESI ( $m/z$ ): [M+H]<sup>+</sup> calcd for C<sub>11</sub>H<sub>14</sub>BrO<sub>2</sub>, 257.0172; found, 257.0156.

To a stirred solution of **S1** (1.30 g, 5.06 mmol), K<sub>2</sub>CO<sub>3</sub> (2.98 g, 21.6 mmol), and Pd(PPh<sub>3</sub>)<sub>4</sub> (637 mg, 551 μmol) in a mixture of toluene (10 mL) and EtOH (40 mL) was added **S2**<sup>1</sup> (1.67 g, 5.00 mmol). After stirring for 5 h at 95 °C, the reaction was quenched with water, phases were separated, and the aqueous layer was extracted three times with Et<sub>2</sub>O. The combined organic layer was washed with brine, dried over Na<sub>2</sub>SO<sub>4</sub> and concentrated. The residue was purified by silica gel column chromatography (hexane/EtOAc = 5/1–4/1) to afford **1b** (1.83 g, 84%) as pale yellow amorphous.

**1b**: *R*<sub>f</sub> 0.48 (hexane/EtOAc = 3.5/1); <sup>1</sup>H NMR (600 MHz, CDCl<sub>3</sub>) δ 0.67–1.16 (m, 6H), 2.79 (brs, 1H), 3.45–3.85 (m, 6H), 5.36 (d, 1H, *J* = 1.0 Hz), 5.68 (brs, 1H), 6.28–7.01 (m, 2H), 7.04–7.60 (m, 8H), 7.60–7.81 (m, 2H), 7.95 (brs, 1H) ppm; <sup>13</sup>C NMR (151 MHz, CDCl<sub>3</sub>) δ 18.4, 19.9, 38.0, 55.1, 56.1, 112.1, 113.6, 116.3, 116.5, 123.0, 123.2, 125.5, 125.9, 126.0, 126.6, 127.3, 127.5, 128.9, 129.0, 130.1, 130.4, 131.7, 133.2, 139.2, 153.7, 160.2, 208.3 ppm (3 signals missing); IR (film) 3055, 3009, 2967, 2932, 2835, 1678, 1593 cm<sup>-1</sup>; HRMS–ESI (*m/z*): [M+H]<sup>+</sup> calcd for C<sub>30</sub>H<sub>29</sub>O<sub>3</sub>, 437.2111; found, 437.2129.

### Synthesis of **2b**

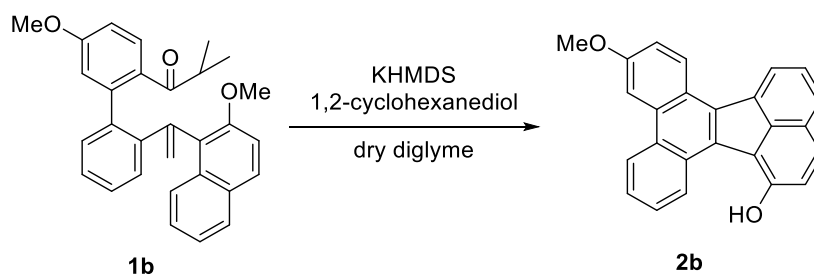

To a stirred solution of **1b** (1.83 g, 4.20 mmol) and *cis*-1,2-cyclohexanediol (99.1 mg, 853 μmol) in dry diglyme (170 mL) was added KHMDS (1.0 M in THF, 12.5 mL, 12.5 mmol). The reaction mixture was evacuated for 15 min to degass the solvent, refilled with Ar and heated to reflux for 24 h with vigorous stirring. After cooling to room temperature, the reaction was quenched with 10% HCl aq. The aqueous layer was extracted three times with Et<sub>2</sub>O and the combined organic layer was washed with water and brine, dried over Na<sub>2</sub>SO<sub>4</sub> and evaporated. The residue was purified by silica gel column chromatography (hexanes/EtOAc = 3/1–1/1) to afford **2b** (900 mg, 62%) as yellow solids. Single crystals of **2b** suitable for X-ray crystallographic analysis were successfully grown by slow diffusion of hexane into the solution of **2b** in AcOEt at room temperature.

**2b**: *R*<sub>f</sub> 0.10 (hexane/EtOAc = 4/1); mp. >250 °C; <sup>1</sup>H NMR (600 MHz, acetone-d<sub>6</sub>) δ 4.10 (s, 3H), 7.43 (dd, 1H, *J* = 8.4, 2.4 Hz), 7.48 (d, 1H, *J* = 8.4 Hz), 7.62–7.74 (m, 3H), 7.94 (d, 2H, *J* = 8.4 Hz), 8.34 (d, 1H, *J* = 1.8 Hz), 8.79 (d, 1H, *J* = 7.2 Hz), 8.88 (d, 1H, *J* = 7.2 Hz), 9.05 (d, 1H, *J* = 9.0 Hz), 10.18 (dd, 1H, *J* = 8.4, 1.2 Hz), 10.40 (brs, 1H) ppm; <sup>13</sup>C NMR (151 MHz, acetone-d<sub>6</sub>) δ 55.8, 105.6, 118.3, 118.9, 122.7, 124.2, 125.3, 125.88, 125.94, 126.6, 127.2, 127.3, 127.4, 130.0, 130.6, 131.0, 131.6, 132.4, 133.2, 134.3, 134.4, 136.8, 153.7, 158.9 ppm (1 signal missing); IR (film) 3275, 2936, 1686, 1620 cm<sup>-1</sup>; HRMS–ESI (*m/z*): [M+H]<sup>+</sup> calcd for C<sub>25</sub>H<sub>17</sub>O<sub>2</sub>, 349.1223; found, 349.1236.

## Synthesis of **5**

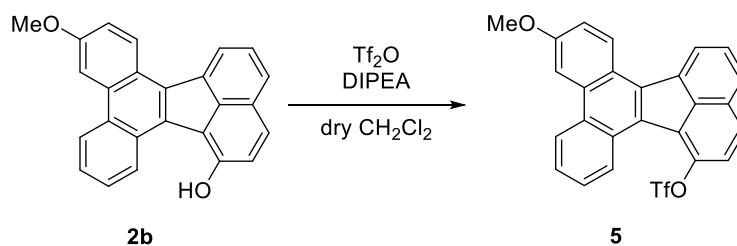

To a solution of **2b** (201 mg, 576  $\mu\text{mol}$ ) and DIPEA (150  $\mu\text{L}$ , 859  $\mu\text{mol}$ ) in dry  $\text{CH}_2\text{Cl}_2$  (15 mL) was added dropwise  $\text{Tf}_2\text{O}$  (140  $\mu\text{L}$ , 864  $\mu\text{mol}$ ) at 0 °C. After stirring for 1 h at room temperature, the reaction was quenched with 10% HCl. The mixture was extracted three times with EtOAc. The combined organic extracts were washed with brine, dried over  $\text{Na}_2\text{SO}_4$  and concentrated. The residue was purified by silica gel column chromatography ( $\text{CHCl}_3$ ) to give **5** (236 mg, 86%) as orange solids.

**5**:  $R_f$  0.45 (hexane/EtOAc = 3.5/1); mp. 172–173 °C;  $^1\text{H}$  NMR (600 MHz,  $\text{CDCl}_3$ )  $\delta$  4.06 (s, 3H), 7.33 (dd, 1H,  $J$  = 9.0, 3.0 Hz), 7.54 (d, 1H,  $J$  = 9.0 Hz), 7.63–7.74 (m, 3H), 7.85 (d, 1H,  $J$  = 8.4 Hz), 7.89 (d, 1H,  $J$  = 9.0 Hz), 8.10 (d, 1H,  $J$  = 2.4 Hz), 8.49 (d, 1H,  $J$  = 7.2 Hz), 8.64 (d, 1H,  $J$  = 8.4 Hz), 8.72 (d, 1H,  $J$  = 9.0 Hz), 8.89 (d, 1H,  $J$  = 8.4 Hz) ppm;  $^{13}\text{C}$  NMR (151 MHz,  $\text{CDCl}_3$ )  $\delta$  55.5, 104.9, 117.4, 118.6 ( $J_{\text{C-F}}$  = 322 Hz), 122.9, 123.4, 123.7, 126.1, 126.4, 126.5, 127.1, 127.2, 127.4, 128.26, 128.30, 128.70, 128.72, 129.9, 130.2, 130.9, 133.67, 133.73, 135.3, 138.1, 142.0, 158.6 ppm; IR (neat) 3001, 2936, 1612, 1412, 1207  $\text{cm}^{-1}$ ; HRMS–ESI ( $m/z$ ):  $[\text{M}+\text{H}]^+$  calcd for  $\text{C}_{26}\text{H}_{16}\text{O}_4\text{S}$ , 481.0716; found, 481.0719.

## Synthesis of **S3**

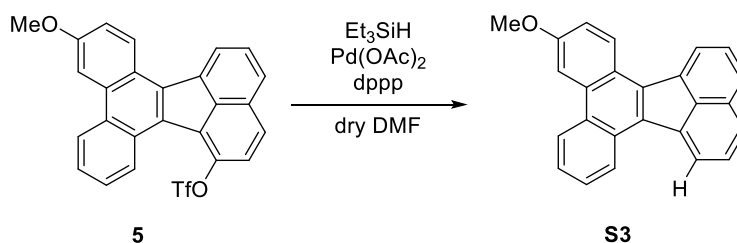

To a solution of **5** (400 mg, 833  $\mu\text{mol}$ ),  $\text{Pd}(\text{OAc})_2$  (19.0 mg, 84.6  $\mu\text{mol}$ ) and dppp (34.8 mg, 84.4  $\mu\text{mol}$ ) in dry DMF (14 mL) was added  $\text{Et}_3\text{SiH}$  (350  $\mu\text{L}$ , 2.20 mmol) at 60 °C and stirred for 2 h. After cooling to room temperature, the reaction was quenched with water. The mixture was extracted three times with EtOAc. The combined organic extracts were washed with brine, dried over  $\text{Na}_2\text{SO}_4$  and concentrated. The residue was purified by silica gel column chromatography ( $\text{CHCl}_3$ ) to give **S3** (251 mg, 91%) as yellow solids.

**S3**:  $R_f$  0.65 (hexane/EtOAc = 3.5/1); mp. 137–139 °C;  $^1\text{H}$  NMR (600 MHz,  $\text{CDCl}_3$ )  $\delta$  4.04 (s, 3H), 7.32 (d, 1H,  $J$  = 7.8 Hz), 7.58–7.71 (m, 4H), 7.80 (d, 1H,  $J$  = 7.8 Hz), 7.83 (d, 1H,  $J$  = 7.8 Hz), 8.06 (s, 1H), 8.37–8.44 (m, 2H), 8.62 (d, 1H,  $J$  = 8.4 Hz), 8.71 (dd, 1H,  $J$  = 8.4, 4.8 Hz), 8.88 (dd, 1H,  $J$  = 8.4, 3.0 Hz) ppm;  $^{13}\text{C}$  NMR (151 MHz,  $\text{CDCl}_3$ )  $\delta$  55.4, 104.9, 117.1, 123.6, 124.3, 124.4, 124.7, 124.9, 125.7, 126.3, 127.0, 127.2, 127.4, 127.8, 127.9, 129.3, 130.1, 131.5, 131.9, 132.5, 133.9, 137.8, 138.0, 157.9 ppm (1 signal missing); IR (neat) 2920, 2851, 1612  $\text{cm}^{-1}$ ; HRMS–ESI ( $m/z$ ):  $[\text{M}+\text{H}]^+$  calcd for  $\text{C}_{25}\text{H}_{17}\text{O}$ , 333.1274; found, 333.1278.

## Synthesis of 3a

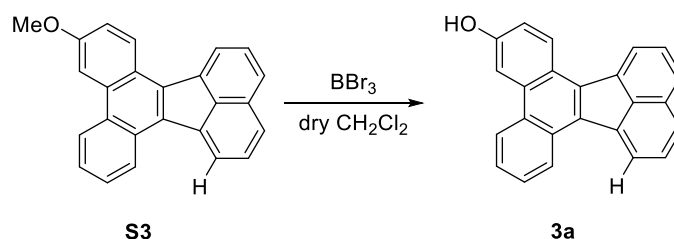

To a solution of **S3** (89.7 mg, 270  $\mu\text{mol}$ ) in dry  $\text{CH}_2\text{Cl}_2$  (5.0 mL) was added dropwise  $\text{BBr}_3$  (1.0 M in  $\text{CH}_2\text{Cl}_2$ , 0.54 mL, 0.54 mmol) at 0  $^\circ\text{C}$ . After stirring for 3.5 h at room temperature, the reaction was quenched with ice water. The mixture was extracted three times with EtOAc. The combined organic extracts were washed with brine, dried over  $\text{Na}_2\text{SO}_4$  and concentrated. Trituration (hexane) afforded **3a** (85.6 mg, 77%) as yellow solids.

**3a**:  $R_f$  0.10 (hexane/EtOAc = 4/1); mp.  $>250$   $^\circ\text{C}$ ;  $^1\text{H}$  NMR (600 MHz, acetone- $d_6$ )  $\delta$  7.40 (dd, 1H,  $J = 9.0, 3.0$  Hz), 7.67 (td, 1H,  $J = 7.2, 1.2$  Hz), 7.70–7.78 (m, 3H), 7.93 (d, 1H,  $J = 8.4$  Hz), 7.96 (d, 1H,  $J = 7.8$  Hz), 8.25 (d, 1H,  $J = 2.4$  Hz), 8.64 (d, 1H,  $J = 7.8$  Hz), 8.67 (d, 1H,  $J = 7.2$  Hz), 8.73 (d, 1H,  $J = 7.8$  Hz), 8.91 (d, 1H,  $J = 9.0$  Hz), 8.94 (s, 1H), 8.95 (d, 1H,  $J = 7.2$  Hz) ppm;  $^{13}\text{C}$  NMR (151 MHz, acetone- $d_6$ )  $\delta$  108.5, 118.9, 124.4, 124.7, 125.4, 125.8, 125.9, 126.9, 127.6, 127.9, 128.4, 128.5, 128.9, 129.0, 130.4, 130.9, 131.0, 131.6, 132.5, 133.9, 134.8, 138.5, 138.7, 157.3 ppm; IR (neat) 3267, 3051, 1609  $\text{cm}^{-1}$ ; HRMS–ESI ( $m/z$ ):  $[\text{M}+\text{H}]^+$  calcd for  $\text{C}_{24}\text{H}_{15}\text{O}$ , 319.1117; found, 319.1135.

## Synthesis of S4

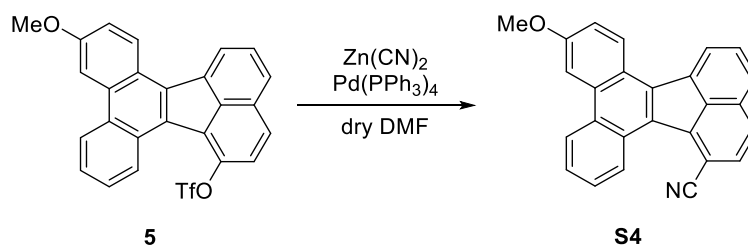

The solution of **5** (480 mg, 1.00 mmol),  $\text{Pd(PPh}_3)_4$  (116 mg, 100  $\mu\text{mol}$ ) and  $\text{Zn(CN)}_2$  (353 mg, 3.01 mmol) in dry DMF (30 mL) was heated at 80  $^\circ\text{C}$  and stirred for 4 h. After cooling to room temperature, the reaction was quenched with water. The mixture was extracted three times with  $\text{CHCl}_3$ . The combined organic extracts were washed with brine, dried over  $\text{Na}_2\text{SO}_4$  and concentrated. The residue was purified by silica gel column chromatography ( $\text{CHCl}_3$ ) to give **S4** (284 mg, 80%) as red solids.

**S4**:  $R_f$  0.52 ( $\text{CHCl}_3$ ); mp.  $>250$   $^\circ\text{C}$ ;  $^1\text{H}$  NMR (600 MHz, DMSO- $d_6$ )  $\delta$  4.06 (s, 3H), 7.40 (dd, 1H,  $J = 9.0, 3.0$  Hz), 7.71 (td, 1H,  $J = 7.8, 1.2$  Hz), 7.74 (td, 1H,  $J = 7.8, 1.8$  Hz), 7.81 (t, 1H,  $J = 7.8$  Hz), 7.97 (d, 1H,  $J = 8.4$  Hz), 8.03 (d, 1H,  $J = 9.0$  Hz), 8.10 (d, 1H,  $J = 8.4$  Hz), 8.26 (d, 1H,  $J = 2.4$  Hz), 8.71 (d, 1H,  $J = 6.6$  Hz), 8.82 (d, 1H,  $J = 9.0$  Hz), 8.92 (d, 1H,  $J = 8.4$  Hz), 9.15 (d, 1H,  $J = 8.4$  Hz) ppm;  $^{13}\text{C}$  NMR (151 MHz, DMSO- $d_6$ )  $\delta$  55.6, 105.2, 118.4, 120.5, 122.6, 124.5, 126.6, 126.7, 127.1, 127.4, 127.7, 128.3, 128.5, 129.4, 129.9, 130.4, 130.9, 131.0, 131.7, 133.6, 135.7, 136.6, 140.4, 159.1 ppm (2 signals missing); IR (neat) 3009, 2967, 2843, 2210, 1609  $\text{cm}^{-1}$ ; HRMS–ESI ( $m/z$ ):  $[\text{M}+\text{H}]^+$  calcd for  $\text{C}_{26}\text{H}_{16}\text{NO}$ , 358.1226; found, 358.1229.

### Synthesis of 3c

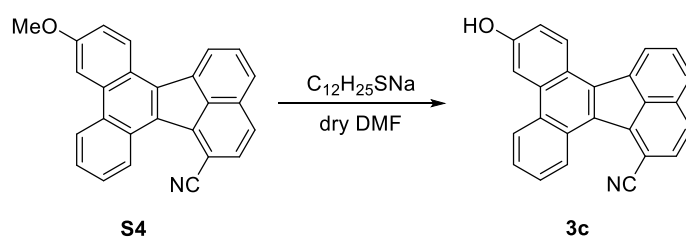

To a solution of **S4** (20.3 mg, 56.8  $\mu\text{mol}$ ) and sodium 1-dodecanethiolate <sup>2</sup> (64.8 mg, 284  $\mu\text{mol}$ ) in dry DMF (1 mL) was heated at 130  $^{\circ}\text{C}$  and stirred for 7.5 h. After cooling to room temperature, the reaction was quenched with 10% HCl. The mixture was extracted twice with EtOAc. The combined organic extracts were washed with brine, dried over  $\text{Na}_2\text{SO}_4$  and concentrated. The residue was purified by silica gel column chromatography (EtOAc) to give **3c** (15.2 mg, 78%) as dark purple solids.

**3c**:  $R_f$  0.10 ( $\text{CHCl}_3$ ); mp.  $>250$   $^{\circ}\text{C}$ ;  $^1\text{H}$  NMR (600 MHz,  $\text{DMSO-d}_6$ )  $\delta$  7.34 (dd, 1H,  $J = 9.0, 1.8$  Hz), 7.70 (t, 1H,  $J = 6.6$  Hz), 7.73 (td, 1H,  $J = 6.6, 1.2$  Hz), 7.82 (t, 1H,  $J = 7.8$  Hz), 7.96 (d, 1H,  $J = 7.8$  Hz), 8.04 (d, 1H,  $J = 7.8$  Hz), 8.09 (d, 1H,  $J = 8.4$  Hz), 8.13 (d, 1H,  $J = 2.4$  Hz), 8.69 (d, 1H,  $J = 7.8$  Hz), 8.75 (d, 1H,  $J = 7.8$  Hz), 8.82 (d, 1H,  $J = 9.0$  Hz), 9.15 (dd, 1H,  $J = 7.8, 1.2$  Hz), 10.3 (brs, 1H) ppm;  $^{13}\text{C}$  NMR (151 MHz,  $\text{DMSO-d}_6$ )  $\delta$  105.0, 107.5, 118.8, 120.6, 121.7, 124.0, 126.6, 126.68, 126.74, 127.3, 127.4, 127.7, 128.1, 128.5, 128.7, 129.7, 130.3, 131.0, 131.7, 133.8, 136.0, 136.8, 140.6, 157.7 ppm (1 signal missing); IR (neat) 3248, 3075, 3048, 2214, 1609  $\text{cm}^{-1}$ ; HRMS–ESI ( $m/z$ ):  $[\text{M}+\text{H}]^+$  calcd for  $\text{C}_{25}\text{H}_{14}\text{NO}$ , 344.1070; found, 344.1093.

### Synthesis of 6

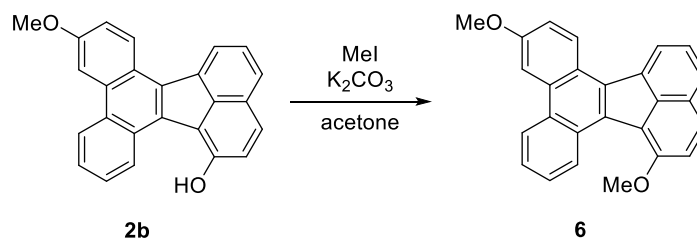

To a solution of **2b** (149 mg, 428  $\mu\text{mol}$ ) and  $\text{K}_2\text{CO}_3$  (183 mg, 1.32 mmol) in acetone (15 mL) was added dropwise MeI (80.0  $\mu\text{L}$ , 1.29 mmol) at room temperature. After refluxing for 1.5 h, the reaction was quenched with water. The mixture was extracted three times with EtOAc. The combined organic extracts were washed with brine, dried over  $\text{Na}_2\text{SO}_4$  and concentrated. The residue was purified by silica gel column chromatography ( $\text{CHCl}_3$ ) to give **6** (142 mg, 91%) as yellow solids.

**6**:  $R_f$  0.70 ( $\text{CHCl}_3$ ); mp. 164–166  $^{\circ}\text{C}$ ;  $^1\text{H}$  NMR (600 MHz,  $\text{DMSO-d}_6$ )  $\delta$  4.05 (s, 3H), 4.28 (s, 3H), 7.42 (dd, 1H,  $J = 9.0, 2.4$  Hz), 7.64–7.77 (m, 4H), 8.02 (d, 1H,  $J = 7.8$  Hz), 8.13 (d, 1H,  $J = 9.0$  Hz), 8.30 (s, 1H,  $J = 3.0$  Hz), 8.81 (d, 1H,  $J = 7.2$  Hz), 8.93 (d, 1H,  $J = 7.8$  Hz), 8.99 (d, 1H,  $J = 9.0$  Hz), 9.75 (d, 1H,  $J = 8.4$  Hz) ppm;  $^{13}\text{C}$  NMR (151 MHz,  $\text{DMSO-d}_6$ )  $\delta$  55.5, 56.8, 105.1, 117.1, 117.8, 119.8, 123.6, 123.9, 124.8, 125.78, 125.82, 126.0, 126.5, 126.8, 127.2, 128.3, 129.1, 129.8, 131.3, 131.5, 132.0, 132.1, 132.5, 135.1, 154.7, 157.8 ppm; IR (neat) 3005, 2928, 2839, 1620  $\text{cm}^{-1}$ ; HRMS–ESI ( $m/z$ ):  $[\text{M}+\text{H}]^+$  calcd for  $\text{C}_{26}\text{H}_{19}\text{O}_2$ , 363.1380; found, 363.1375.

## Synthesis of 3b

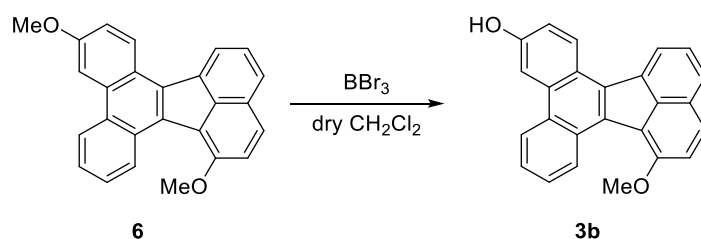

To a solution of **6** (324 mg, 893  $\mu\text{mol}$ ) in dry  $\text{CH}_2\text{Cl}_2$  (10 mL) was added dropwise  $\text{BBr}_3$  (1.0 M in  $\text{CH}_2\text{Cl}_2$ , 1.20 mL, 1.20 mmol) at 0 °C. After stirring for 2.5 h at room temperature, the reaction was quenched with ice water. The mixture was extracted three times with EtOAc. The combined organic extracts were washed with brine, dried over  $\text{Na}_2\text{SO}_4$  and concentrated. The residue was purified by silica gel column chromatography ( $\text{CHCl}_3$ ) to give **3b** (158 mg, 51%) as orange solids.

**3b**:  $R_f$  0.11 ( $\text{CHCl}_3$ ); mp. 198–200 °C;  $^1\text{H}$  NMR (600 MHz,  $\text{CDCl}_3$ )  $\delta$  4.26 (s, 3H), 5.08 (brs, 1H), 7.30 (dd, 1H,  $J = 9.0, 3.0$  Hz), 7.48 (d, 1H,  $J = 7.8$  Hz), 7.62–7.67 (m, 2H), 7.70 (t, 1H,  $J = 7.8$  Hz), 7.88 (d, 1H,  $J = 7.8$  Hz), 8.14 (d, 1H,  $J = 9.0$  Hz), 8.16 (d, 1H,  $J = 2.4$  Hz), 8.62 (d, 1H,  $J = 7.2$  Hz), 8.64 (d, 1H,  $J = 7.8$  Hz), 8.90 (d, 1H,  $J = 9.0$  Hz), 9.77 (d, 1H,  $J = 8.4$  Hz) ppm;  $^{13}\text{C}$  NMR (151 MHz,  $\text{CDCl}_3$ )  $\delta$  56.8, 107.8, 116.6, 117.0, 121.6, 123.1, 124.7, 125.2, 125.5, 125.7, 126.5, 126.66, 126.72, 128.8, 129.8, 130.0, 130.8, 132.2, 132.7, 133.1, 133.7, 136.4, 153.6, 154.6 ppm (1 signal missing); IR (neat) 3425, 3246, 2963, 2916, 2847, 1616  $\text{cm}^{-1}$ ; HRMS–ESI ( $m/z$ ):  $[\text{M}+\text{H}]^+$  calcd for  $\text{C}_{25}\text{H}_{17}\text{O}_2$ , 349.1223; found, 349.1247.

## Synthesis of 7

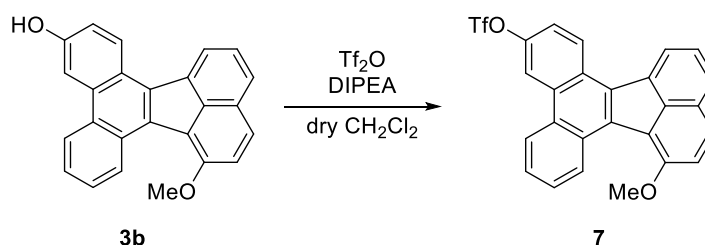

To a solution of **3b** (147 mg, 422  $\mu\text{mol}$ ) and DIPEA (110  $\mu\text{L}$ , 631  $\mu\text{mol}$ ) in dry  $\text{CH}_2\text{Cl}_2$  (10 mL) was added dropwise  $\text{Tf}_2\text{O}$  (110  $\mu\text{L}$ , 655  $\mu\text{mol}$ ) at 0 °C. After stirring for 2.5 h at room temperature, the reaction was quenched with 10% HCl. The mixture was extracted three times with EtOAc. The combined organic extracts were washed with brine, dried over  $\text{Na}_2\text{SO}_4$  and concentrated. The residue was purified by silica gel column chromatography ( $\text{CHCl}_3$ ) to give **7** (182 mg, 88%) as yellow solids.

**7**:  $R_f$  0.85 ( $\text{CHCl}_3$ ); mp. 150–151 °C;  $^1\text{H}$  NMR (600 MHz,  $\text{DMSO}-d_6$ )  $\delta$  4.28 (s, 3H), 7.66–7.72 (m, 2H), 7.73–7.82 (m, 3H), 8.04 (d, 1H,  $J = 8.4$  Hz), 8.18 (d, 1H,  $J = 9.0$  Hz), 8.80 (d, 1H,  $J = 7.8$  Hz), 8.93 (d, 1H,  $J = 8.4$  Hz), 9.02 (d, 1H,  $J = 2.4$  Hz), 9.16 (d, 1H,  $J = 9.0$  Hz), 9.75 (d, 1H,  $J = 7.8$  Hz) ppm;  $^{13}\text{C}$  NMR (151 MHz,  $\text{DMSO}-d_6$ )  $\delta$  56.7, 116.6, 116.8, 118.4 ( $J_{\text{C-F}} = 321$  Hz), 118.9, 120.4, 124.0, 124.7, 125.8, 126.0, 126.9, 127.5, 127.6, 127.7, 128.5, 128.6, 129.1, 129.6, 130.2, 131.4, 131.9, 132.7, 134.2, 135.8, 147.3, 155.6 ppm; IR (neat) 2940, 2843, 1577, 1416, 1211, 1130  $\text{cm}^{-1}$ ; HRMS–ESI ( $m/z$ ):  $[\text{M}+\text{K}]^+$  calcd for  $\text{C}_{26}\text{H}_{15}\text{KO}_4\text{S}$ , 519.0275; found, 519.0302.

## Synthesis of S5

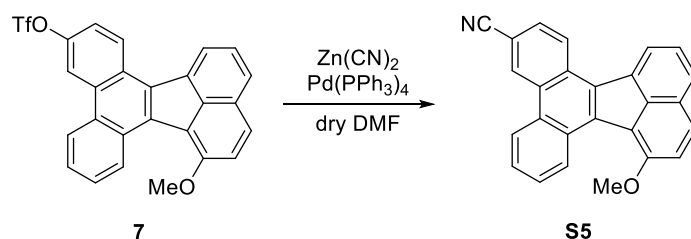

The solution of **7** (177 mg, 368  $\mu\text{mol}$ ),  $\text{Pd}(\text{PPh}_3)_4$  (43.0 mg, 37.2  $\mu\text{mol}$ ) and  $\text{Zn}(\text{CN})_2$  (129 mg, 1.10 mmol) in dry DMF (7.5 mL) was heated to 80  $^\circ\text{C}$  and stirred for 1 h. After cooling to room temperature, the reaction was quenched with water. The mixture was extracted three times with EtOAc. The combined organic extracts were washed with brine, dried over  $\text{Na}_2\text{SO}_4$  and concentrated. The residue was purified by silica gel column chromatography ( $\text{CHCl}_3$ ) to give **S5** (122 mg, 92%) as yellow solids.

**S5**:  $R_f$  0.59 ( $\text{CHCl}_3$ ); mp.  $>250$   $^\circ\text{C}$ ;  $^1\text{H}$  NMR (600 MHz,  $\text{DMSO-d}_6$ )  $\delta$  4.31 (s, 3H), 7.69–7.80 (m, 3H), 7.82 (t, 1H,  $J = 7.8$  Hz), 8.04 (s, 1H,  $J = 8.4$  Hz), 8.08 (d, 1H,  $J = 8.4$  Hz), 8.24 (d, 1H,  $J = 9.0$  Hz), 8.85 (d, 1H,  $J = 7.8$  Hz), 9.04 (d, 1H,  $J = 7.8$  Hz), 9.15 (d, 1H,  $J = 8.4$  Hz), 9.47 (s, 1H), 9.78 (d, 1H,  $J = 8.4$  Hz) ppm;  $^{13}\text{C}$  NMR (151 MHz,  $\text{DMSO-d}_6$ )  $\delta$  56.9, 108.2, 116.9, 118.8, 119.5, 124.0, 124.7, 125.9, 126.0, 126.3, 127.3, 127.67, 127.71, 128.5, 129.0, 129.4, 129.6, 129.8, 130.1, 131.3, 132.0, 133.2, 134.0, 137.4, 156.1 ppm (1 signal missing); IR (neat) 3055, 2920, 2843, 2218, 1605  $\text{cm}^{-1}$ ; HRMS–ESI ( $m/z$ ):  $[\text{M}+\text{H}]^+$  calcd for  $\text{C}_{26}\text{H}_{16}\text{NO}$ , 358.1226; found, 358.1214.

## Synthesis of 2c

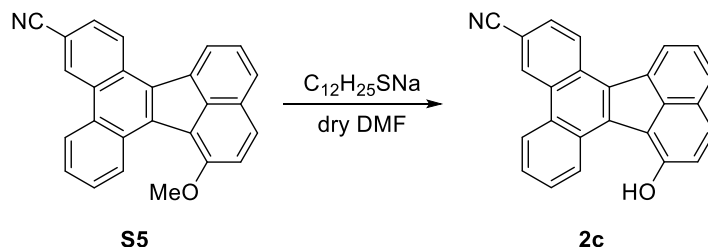

To a solution of **S5** (111 mg, 311  $\mu\text{mol}$ ) and sodium 1-dodecanethiolate (352 mg, 1.57 mmol) in dry DMF (6 mL) was heated at 120  $^\circ\text{C}$  and stirred for 4 h. After cooling to room temperature, the reaction was quenched with 10% HCl. The mixture was extracted three times with EtOAc. The combined organic extracts were washed with brine, dried over  $\text{Na}_2\text{SO}_4$  and concentrated. The residue was purified by silica gel column chromatography (EtOAc) to give **2c** (104 mg, 98%) as yellow solids.

**2c**:  $R_f$  0.09 ( $\text{CHCl}_3$ ); mp.  $>250$   $^\circ\text{C}$ ;  $^1\text{H}$  NMR (600 MHz,  $\text{DMSO-d}_6$ )  $\delta$  7.48 (d, 1H,  $J = 8.4$  Hz), 7.69 (t, 1H,  $J = 7.8$  Hz), 7.77 (t, 1H,  $J = 7.8$  Hz), 7.82 (t, 1H,  $J = 7.8$  Hz), 8.02 (d, 1H,  $J = 7.8$  Hz), 8.05 (d, 1H,  $J = 9.0$  Hz), 8.07 (d, 1H,  $J = 9.0$  Hz), 8.85 (d, 1H,  $J = 7.2$  Hz), 9.05 (d, 1H,  $J = 8.4$  Hz), 9.18 (d, 1H,  $J = 9.0$  Hz), 9.49 (s, 1H), 10.14 (d, 1H,  $J = 7.8$  Hz), 12.02 (brs, 1H) ppm;  $^{13}\text{C}$  NMR (151 MHz,  $\text{DMSO-d}_6$ )  $\delta$  107.9, 116.2, 119.6, 122.1, 123.9, 124.3, 125.2, 125.7, 125.9, 127.19, 127.24, 127.6, 128.9, 129.1, 129.39, 129.43, 129.6, 131.6, 132.6, 132.7, 133.7, 137.7, 155.3 ppm (2 signals missing); IR (neat) 3310, 2943, 2862, 2226, 1701, 1605  $\text{cm}^{-1}$ ; HRMS–ESI ( $m/z$ ):  $[\text{M}+\text{H}]^+$  calcd for  $\text{C}_{25}\text{H}_{14}\text{NO}$ , 344.1070; found, 344.1077.



## Synthesis of 4

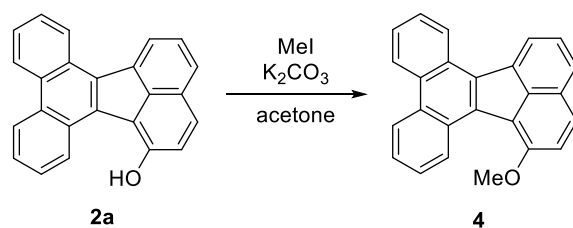

To a solution of **2a** (50.5 mg, 159  $\mu\text{mol}$ ) and  $\text{K}_2\text{CO}_3$  (67.0 mg, 485  $\mu\text{mol}$ ) in acetone (6.0 mL) was added dropwise MeI (30.0  $\mu\text{L}$ , 483  $\mu\text{mol}$ ) at room temperature. After refluxing for 3 h, the reaction was quenched with water. The mixture was extracted three times with EtOAc. The combined organic extracts were washed with brine, dried over  $\text{Na}_2\text{SO}_4$  and concentrated. The residue was purified by silica gel column chromatography ( $\text{CHCl}_3$ ) to give **4** (51.9 mg, 98%) as yellow solids.

**4**:  $R_f$  0.79 ( $\text{CHCl}_3$ ); mp. 190–192  $^\circ\text{C}$ ;  $^1\text{H}$  NMR (600 MHz,  $\text{CDCl}_3$ )  $\delta$  4.27 (s, 3H), 7.49 (d, 1H,  $J = 9.0$  Hz), 7.64–7.75 (m, 5H), 7.89 (d, 1H,  $J = 7.8$  Hz), 7.99 (d, 1H,  $J = 8.4$  Hz), 8.70 (d, 1H,  $J = 7.2$  Hz), 8.81 (t, 2H,  $J = 7.2$  Hz), 9.00 (d, 1H,  $J = 8.4$  Hz), 9.80 (dd, 1H,  $J = 7.8, 1.8$  Hz) ppm;  $^{13}\text{C}$  NMR (151 MHz,  $\text{CDCl}_3$ )  $\delta$  56.8, 116.5, 121.5, 123.0, 123.5, 124.9, 125.2, 125.4, 125.6, 125.7, 126.1, 126.3, 126.7, 127.0, 128.7, 129.4, 129.9, 130.9, 131.3, 132.1, 133.2, 135.7, 136.5, 155.0 ppm (1 signal missing); IR (neat) 3005, 2962, 2936, 2839, 1574  $\text{cm}^{-1}$ ; HRMS–ESI ( $m/z$ ):  $[\text{M}+\text{H}]^+$  calcd for  $\text{C}_{25}\text{H}_{17}\text{O}$ , 333.1274; found, 333.1261.

## 2. X-ray crystallographic data

CCDC2251568 contains the supplementary crystallographic data for this paper. These data can be obtained free of charge from The Cambridge Crystallographic Data Centre via [www.ccdc.cam.ac.uk/data\\_request/cif](http://www.ccdc.cam.ac.uk/data_request/cif)

**Table S1.** Summary of crystallographic data

|                                             |                                                               |
|---------------------------------------------|---------------------------------------------------------------|
| Empirical formula                           | C <sub>25</sub> H <sub>16</sub> O <sub>2</sub>                |
| Formula weight                              | 348.38                                                        |
| Temperature/K                               | 93.0                                                          |
| Crystal system                              | monoclinic                                                    |
| Space group                                 | P2 <sub>1</sub> /c                                            |
| a/Å                                         | 15.6918(3)                                                    |
| b/Å                                         | 5.05931(11)                                                   |
| c/Å                                         | 21.7368(5)                                                    |
| $\alpha$ /°                                 | 90                                                            |
| $\beta$ /°                                  | 108.000(2)                                                    |
| $\gamma$ /°                                 | 90                                                            |
| Volume/Å <sup>3</sup>                       | 1641.22(6)                                                    |
| Z                                           | 4                                                             |
| $\rho$ calc/g/cm <sup>3</sup>               | 1.410                                                         |
| $\mu$ /mm <sup>-1</sup>                     | 0.699                                                         |
| F(000)                                      | 728.0                                                         |
| Crystal size/mm <sup>3</sup>                | 0.02 × 0.02 × 0.01                                            |
| Radiation                                   | CuK $\alpha$ ( $\lambda$ = 1.54184)                           |
| 2 $\Theta$ range for data collection/°      | 8.554 to 146.784                                              |
| Index ranges                                | -19 ≤ h ≤ 19, -6 ≤ k ≤ 3, -27 ≤ l ≤ 22                        |
| Reflections collected                       | 11768                                                         |
| Independent reflections                     | 3238 [R <sub>int</sub> = 0.0333, R <sub>sigma</sub> = 0.0362] |
| Data/restraints/parameters                  | 3238/0/247                                                    |
| Goodness-of-fit on F <sup>2</sup>           | 1.071                                                         |
| Final R indexes [I >= 2 $\sigma$ (I)]       | R <sub>1</sub> = 0.0384, wR <sub>2</sub> = 0.1067             |
| Final R indexes [all data]                  | R <sub>1</sub> = 0.0433, wR <sub>2</sub> = 0.1095             |
| Largest diff. peak/hole / e Å <sup>-3</sup> | 0.26/-0.20                                                    |

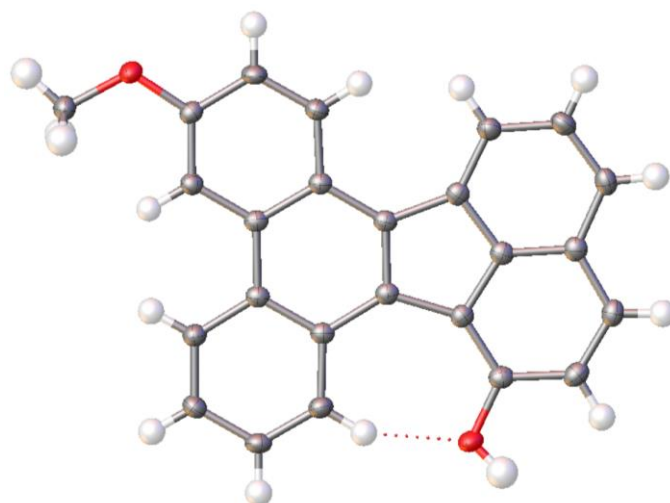

**Fig. S1** X-ray crystallographic structure of **2b**

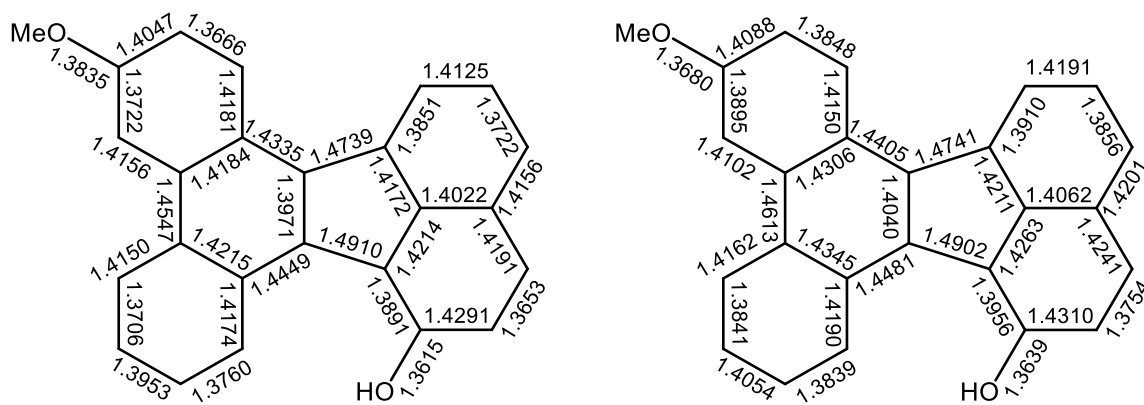

**Fig. S2** Comparison with bond lengths of **2b** from crystallographic data (left) and calculation (right, see Fig. S12).

### 3. UV-vis absorption spectra of 2 and 3 in CH<sub>2</sub>Cl<sub>2</sub> under acidic conditions

The UV-vis spectra of **2** and **3** in CH<sub>2</sub>Cl<sub>2</sub> was unchanged under acidic conditions (left, blue line) with the addition of an excess amount of trifluoroacetic acid (TFA) compared to neutral conditions (right, black line). The spectra of **2a**, **2b**, **2c**, **3a**, **3b**, and **3c** are shown in Figs. S3-S8, respectively.

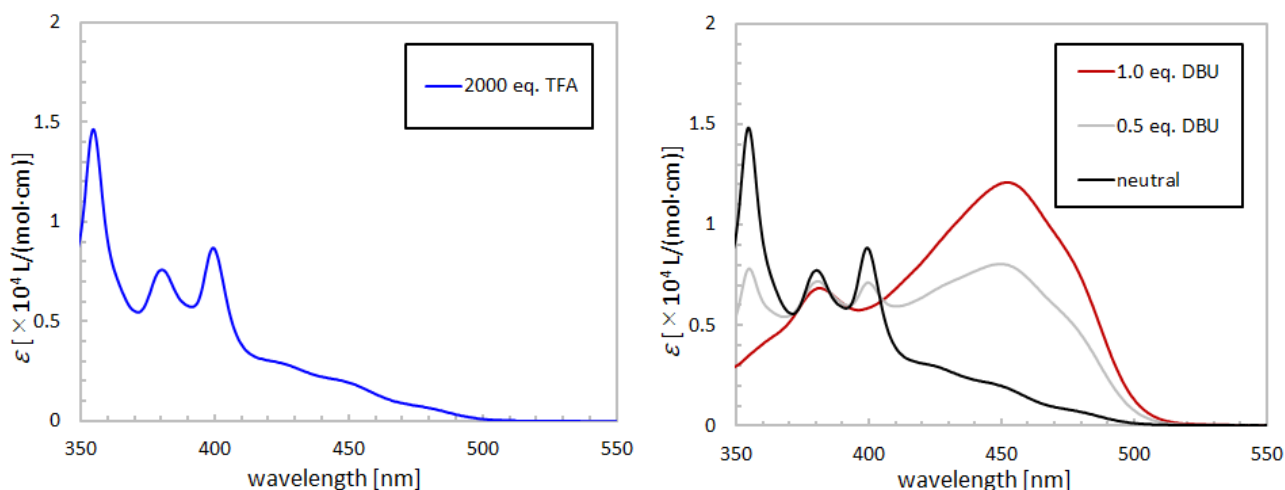

**Fig. S3** UV-vis absorption spectra of **2a** ( $5.0 \times 10^{-5}$  M) at 296 K, added with TFA (left) or DBU (right).

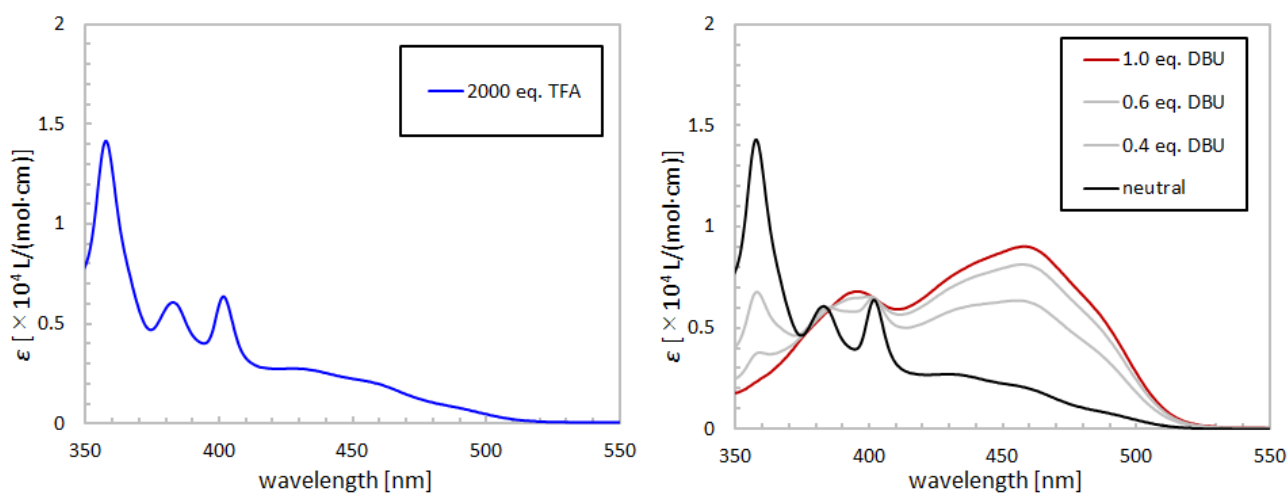

**Fig. S4** UV-vis absorption spectra of **2b** ( $5.0 \times 10^{-5}$  M) at 296 K, added with TFA (left) or DBU (right).

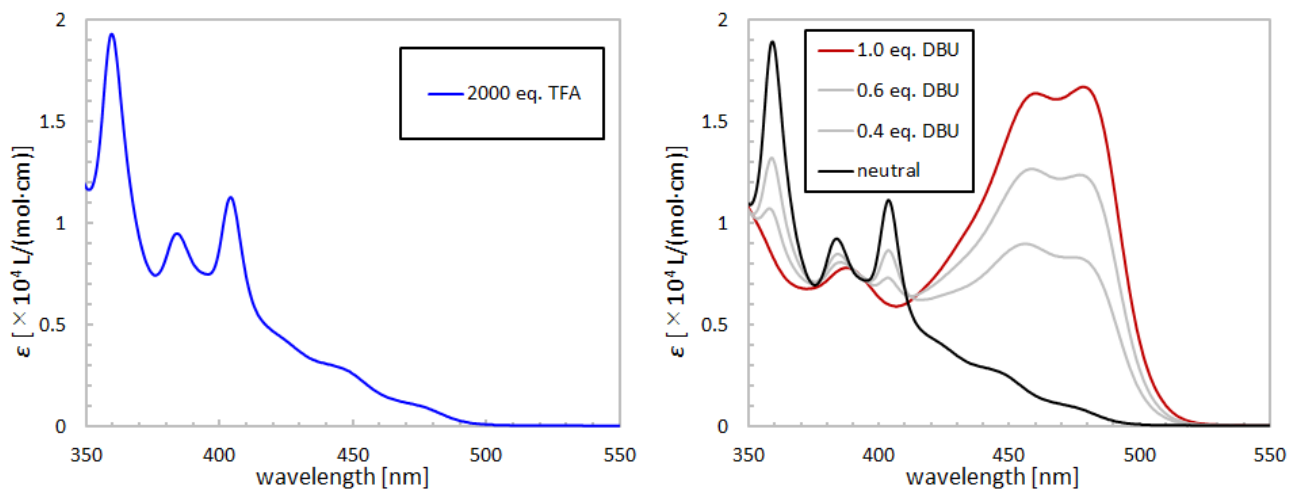

**Fig. S5** UV-vis absorption spectra of **2c** ( $5.0 \times 10^{-5}$  M) at 296 K, added with TFA (left) or DBU (right).

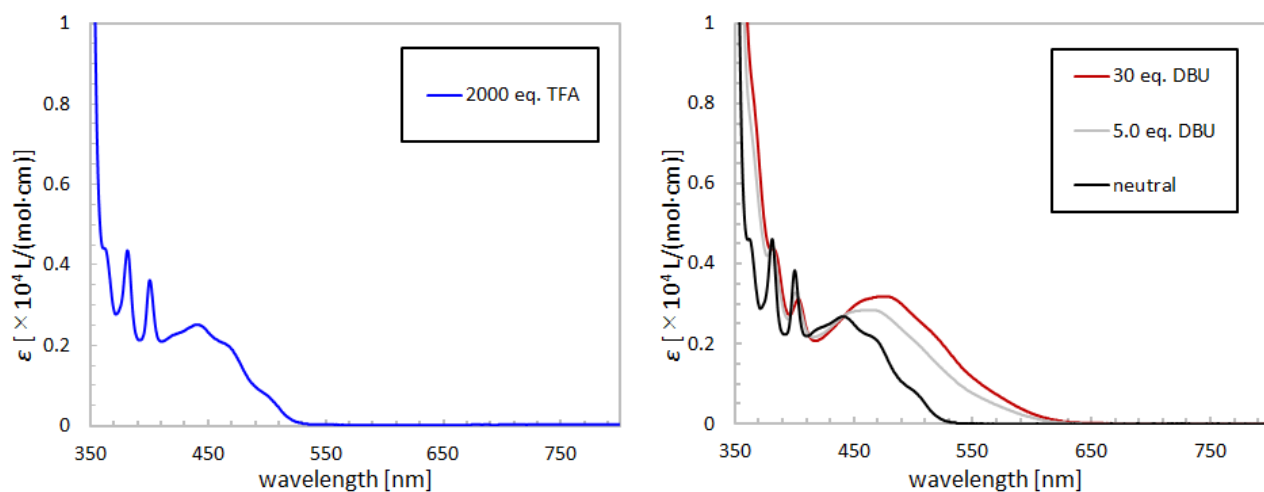

**Fig. S6** UV-vis absorption spectra of **3a** ( $5.0 \times 10^{-5}$  M) at 296 K, added with TFA (left) or DBU (right).

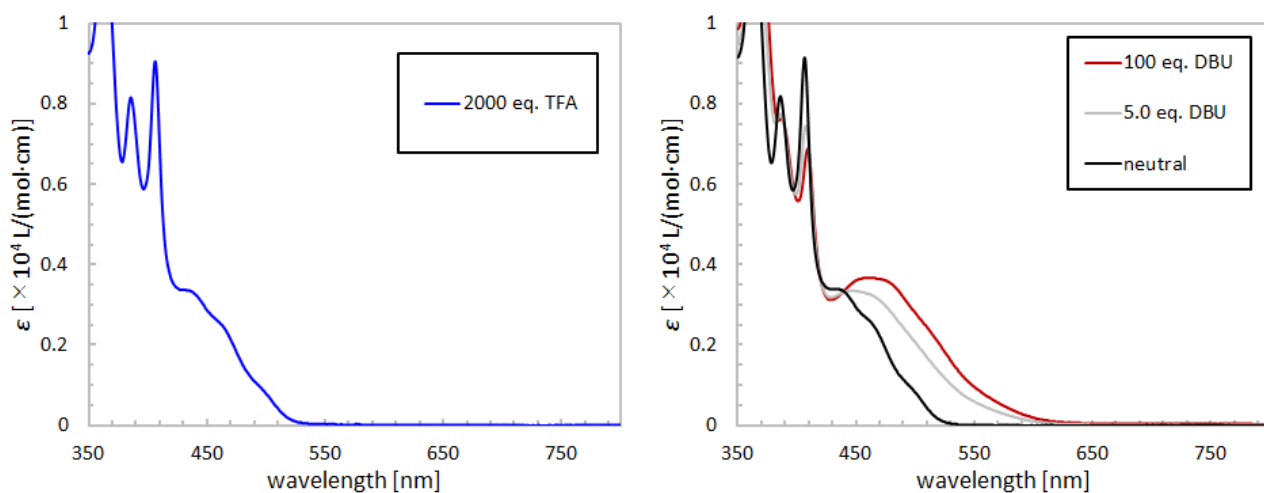

**Fig. S7** UV-vis absorption spectra of **3b** ( $5.0 \times 10^{-5}$  M) at 296 K, added with TFA (left) or DBU (right).

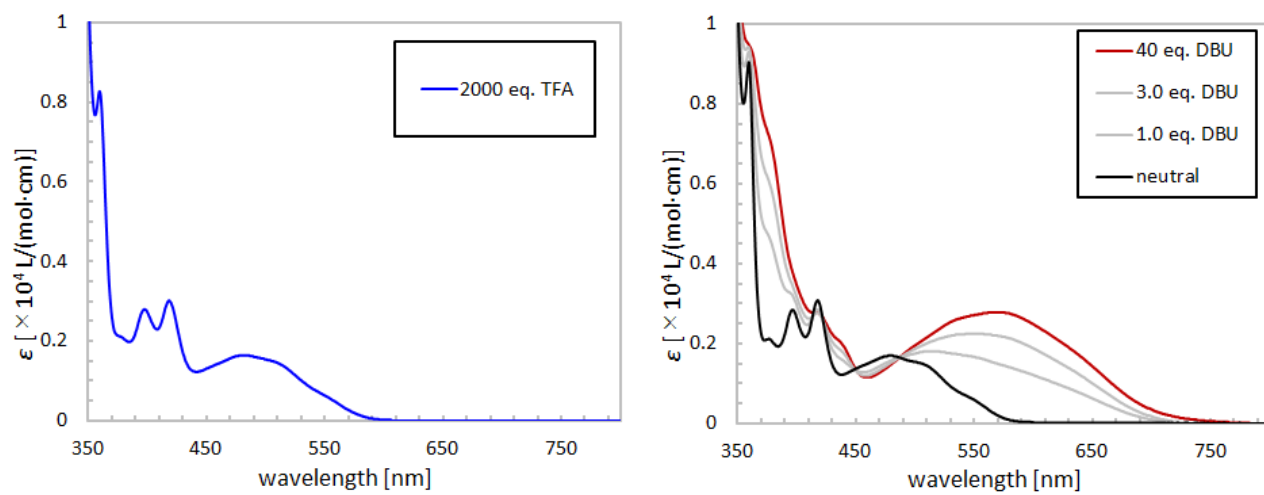

**Fig. S8** UV-vis absorption spectra of **3c** ( $5.0 \times 10^{-5}\text{M}$ ) at 296 K, added with TFA (left) or DBU (right).

#### 4. Solvatochromic properties of **2c** and **3c** in EtOH

The effect of solvent on halochromism was investigated for compounds **2c** and **3c**.  $\text{CH}_2\text{Cl}_2$  as a nonpolar solvent, dimethylsulfoxide (DMSO) as an aprotic polar solvent, and EtOH as a protic polar solvent were selected (Fig. S9). The chromic properties (UV-vis spectra) of **2c** and **3c** in  $\text{CH}_2\text{Cl}_2$  and DMSO were depicted in the main text. The chromic properties of **2c** and **3c** in EtOH were similar to those in DMSO.

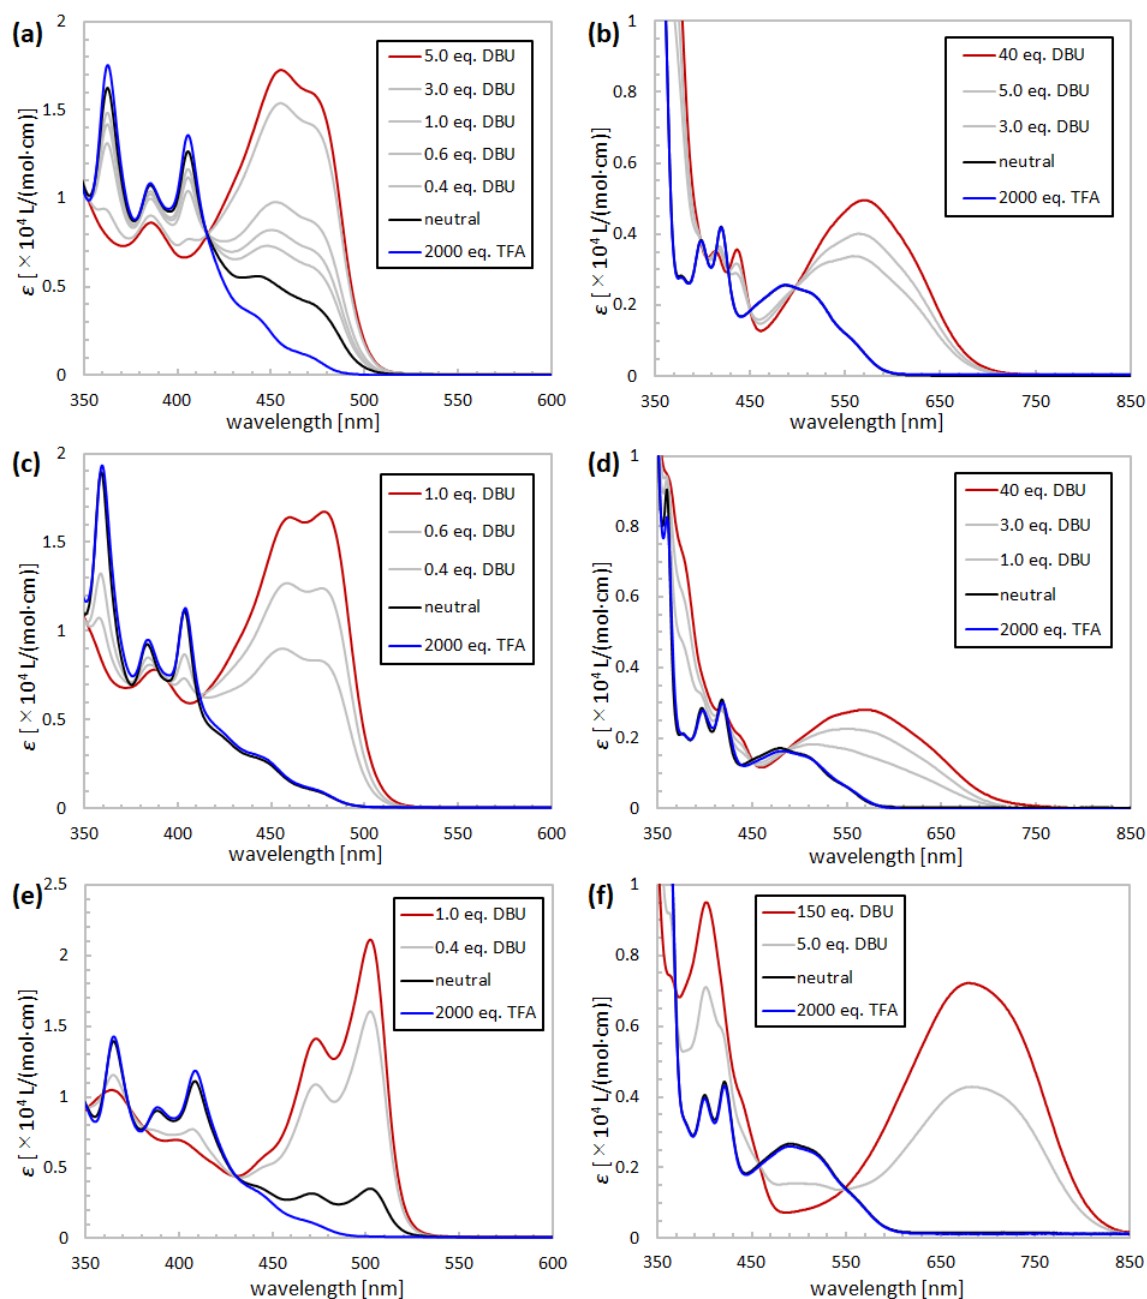

**Fig. S9** UV-vis absorption spectra of **2c** and **3c** ( $5.0 \times 10^{-5}\text{M}$ ) in EtOH,  $\text{CH}_2\text{Cl}_2$  or DMSO at 296 K, added with TFA or DBU. (a) **2c** in EtOH, (b) **3c** in EtOH, (c) **2c** in  $\text{CH}_2\text{Cl}_2$ , (d) **3c** in  $\text{CH}_2\text{Cl}_2$ , (e) **2c** in DMSO, (f) **3c** in DMSO.

**Table S2.** Photophysical properties of hydroxydibenzofluoranthenes **2c** and **3c** in EtOH.<sup>a</sup>

|           | Compound                                           | $\lambda_{\text{Abs}}$ [nm] ( $\epsilon$ [ $10^3$ L/(mol cm)]) |
|-----------|----------------------------------------------------|----------------------------------------------------------------|
| <b>2c</b> | Neutral form (no additive)                         | 443 (5.60)                                                     |
|           | Anionic form (in the presence of DBU) <sup>b</sup> | 455 (17.3)                                                     |
| <b>3c</b> | Neutral form                                       | 488 (2.58)                                                     |
|           | Anionic form                                       | 680 (4.96)                                                     |

a) Absorption spectra was recorded in solution at room temperature at  $c = 5.0 \times 10^{-5}$  M. b) Each hydroxydibenzofluoranthene (anionic form) was studied in the presence of DBU (for **2c**: 5.0 eq.; **3c**: 40 eq.)

**Table S3.** Photophysical properties of hydroxydibenzofluoranthenes **2c** and **3c** in DMSO.<sup>a</sup>

|           | Compound                                           | $\lambda_{\text{Abs}}$ [nm] ( $\epsilon$ [ $10^3$ L/(mol cm)]) |
|-----------|----------------------------------------------------|----------------------------------------------------------------|
| <b>2c</b> | Neutral form (no additive)                         | 471 (3.14), 503 (3.48)                                         |
|           | Anionic form (in the presence of DBU) <sup>b</sup> | 503 (21.1)                                                     |
| <b>3c</b> | Neutral form                                       | 421 (4.42), 492 (2.66)                                         |
|           | Anionic form                                       | 680 (7.22)                                                     |

a) Absorption spectra was recorded in solution at room temperature at  $c = 5.0 \times 10^{-5}$  M. b) Each hydroxydibenzofluoranthene (anionic form) was studied in the presence of DBU (for **2c**: 1.0 eq.; **3c**: 150 eq.)



## 5. HOMA Calculation

Harmonic Oscillator Model of Aromaticity (HOMA) <sup>3</sup> values for **2b** was calculated from a following equation:

$$\text{HOMA} = 1 - \frac{1}{n} \{ \alpha_{\text{CC}} \sum [(R(\text{CC})_{\text{opt}} - R_i)]^2 \}$$

where  $n$  is the number of bonds taken into summation,  $\alpha$  is an empirical constant,  $R_{\text{opt}}$  is an optimal bond length,  $R_i$  is an experimental bond length from X-ray crystallographic structure.

For HOMA,  $\alpha_{\text{CC}} = 257.7$ ,  $R(\text{CC})_{\text{opt}} = 1.388 \text{ \AA}$  were used.

**Table S4.** HOMA values for **2b**

| Ring | A     | B     | C     | D       | E     | F     |
|------|-------|-------|-------|---------|-------|-------|
| HOMA | 0.846 | 0.506 | 0.862 | -0.0328 | 0.885 | 0.807 |

## 6. Computational results

All the calculations were performed using Gaussian 16 program.<sup>3</sup> Electronic transitions were simulated by time-dependent DFT (TD-DFT) calculations at the B3LYP/CPCM(DCM)/6-31+G(d,p) level of theory for the structure optimized at the B3LYP/CPCM(DCM)/6-31+G(d,p) level of theory. NICS values were calculated using the standard GIAO (GIAO=NMR) at the level of B3LYP/6-31+G(d,p) for the structure optimized at the B3LYP/6-31+G(d,p) theoretical level.

### 6-1. Frontier molecular orbitals and energy levels of 2b and 3b

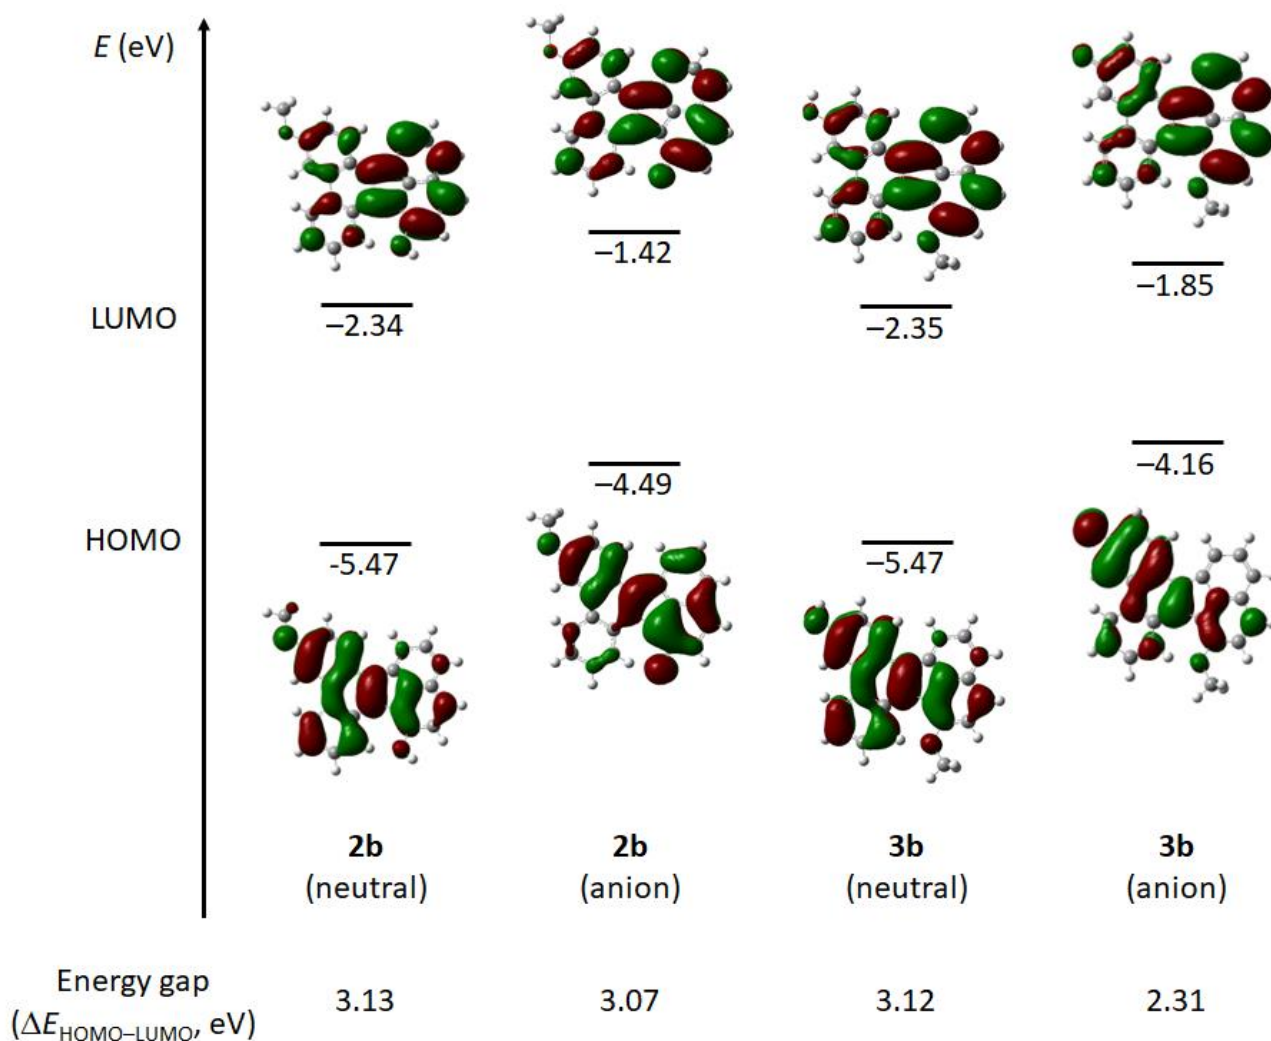

**Fig. S10** Calculated frontier molecular orbitals and energy levels of **2b** (neutral, anion) and **3b** (neutral, anion) at the B3LYP/6-31+G(d,p)-CPCM(DCM).

## 6-2. TD-DFT calculations

**Table S5.** Major theoretical electronic transitions of **2a** (neutral).

| Excited states | Energy (eV) | Wavelength (nm) | Oscillator strength ( <i>f</i> ) | description                                                  |
|----------------|-------------|-----------------|----------------------------------|--------------------------------------------------------------|
| 1              | 2.7350      | 453.33          | 0.0920                           | H → L (0.69246)                                              |
| 2              | 3.1955      | 388.00          | 0.2430                           | H-1 → L (0.67573)<br>H → L+1 (0.16702)                       |
| 3              | 3.5506      | 349.20          | 0.1494                           | H-2 → L (0.63426)<br>H-1 → L (0.12719)<br>H → L+1 (-0.25744) |

**Table S6.** Major theoretical electronic transitions of **2a** (anion).

| Excited states | Energy (eV) | Wavelength (nm) | Oscillator strength ( <i>f</i> ) | description                             |
|----------------|-------------|-----------------|----------------------------------|-----------------------------------------|
| 1              | 2.6916      | 460.64          | 0.2392                           | H → L (0.69029)                         |
| 2              | 3.0581      | 405.42          | 0.1073                           | H-1 → L (0.64837)<br>H → L+1 (-0.25335) |
| 3              | 3.2242      | 384.54          | 0.1755                           | H-1 → L (0.24434)<br>H → L+1 (0.64787)  |

**Table S7.** Major theoretical electronic transitions of **2b** (neutral).

| Excited states | Energy (eV) | Wavelength (nm) | Oscillator strength ( <i>f</i> ) | description                                                 |
|----------------|-------------|-----------------|----------------------------------|-------------------------------------------------------------|
| 1              | 2.5942      | 477.93          | 0.1133                           | H → L (0.69523)                                             |
| 2              | 3.2079      | 386.49          | 0.2274                           | H-1 → L (0.67714)<br>H → L+1 (-0.22317)                     |
| 3              | 3.4950      | 354.75          | 0.2374                           | H-2 → L (0.45751)<br>H-1 → L (0.20340)<br>H → L+1 (0.48061) |

**Table S8.** Major theoretical electronic transitions of **2b** (anion).

| Excited states | Energy (eV) | Wavelength (nm) | Oscillator strength ( <i>f</i> ) | description                             |
|----------------|-------------|-----------------|----------------------------------|-----------------------------------------|
| 1              | 2.6069      | 475.60          | 0.2245                           | H → L (0.69253)                         |
| 2              | 3.0125      | 411.56          | 0.0484                           | H-1 → L (0.56199)<br>H → L+1 (-0.41699) |
| 3              | 3.1230      | 411.56          | 0.0484                           | H-1 → L (0.41074)<br>H → L+1 (0.56026)  |

**Table S9.** Major theoretical electronic transitions of **2c** (neutral).

| Excited states | Energy (eV) | Wavelength (nm) | Oscillator strength ( <i>f</i> ) | description        |
|----------------|-------------|-----------------|----------------------------------|--------------------|
| 1              | 2.7470      | 451.34          | 0.1319                           | H → L (0.68950)    |
| 2              | 3.1460      | 394.10          | 0.3123                           | H-1 → L (0.67675)  |
|                |             |                 |                                  | H → L+1 (0.15874)  |
| 3              | 3.5131      | 352.92          | 0.1795                           | H-2 → L (0.58354)  |
|                |             |                 |                                  | H-1 → L (0.14905)  |
|                |             |                 |                                  | H → L+1 (-0.29864) |
|                |             |                 |                                  | H → L+2 (-0.17114) |

**Table S10.** Major theoretical electronic transitions of **2c** (anion).

| Excited states | Energy (eV) | Wavelength (nm) | Oscillator strength ( <i>f</i> ) | description        |
|----------------|-------------|-----------------|----------------------------------|--------------------|
| 1              | 2.6422      | 469.25          | 0.4327                           | H → L (0.69146)    |
| 2              | 2.9798      | 416.08          | 0.0665                           | H-1 → L (0.65007)  |
|                |             |                 |                                  | H → L+1 (-0.24816) |
| 3              | 3.1481      | 393.84          | 0.1867                           | H-1 → L (0.24310)  |
|                |             |                 |                                  | H → L+1 (0.63015)  |
|                |             |                 |                                  | H → L+2 (-0.15109) |

**Table S11.** Major theoretical electronic transitions of **3a** (neutral).

| Excited states | Energy (eV) | Wavelength (nm) | Oscillator strength ( <i>f</i> ) | description        |
|----------------|-------------|-----------------|----------------------------------|--------------------|
| 1              | 2.5635      | 483.65          | 0.0912                           | H → L (0.69633)    |
| 2              | 3.2232      | 384.66          | 0.1817                           | H-2 → L (0.11089)  |
|                |             |                 |                                  | H-1 → L (0.63200)  |
| 3              | 3.5218      | 352.04          | 0.3411                           | H → L+1 (0.27733)  |
|                |             |                 |                                  | H-2 → L (0.43514)  |
|                |             |                 |                                  | H-1 → L (-0.27657) |
|                |             |                 |                                  | H → L+1 (0.46801)  |

**Table S12.** Major theoretical electronic transitions of **3a** (anion).

| Excited states | Energy (eV) | Wavelength (nm) | Oscillator strength ( <i>f</i> ) | description        |
|----------------|-------------|-----------------|----------------------------------|--------------------|
| 1              | 1.9012      | 652.15          | 0.2027                           | H → L (0.70014)    |
| 2              | 2.9292      | 423.27          | 0.0088                           | H-2 → L (-0.26954) |
|                |             |                 |                                  | H → L+1 (0.64752)  |
| 3              | 3.0910      | 401.11          | 0.0000                           | H-1 → L (0.70127)  |

**Table S13.** Major theoretical electronic transitions of **3b** (neutral).

| Excited states | Energy (eV) | Wavelength (nm) | Oscillator strength ( <i>f</i> ) | description                                                  |
|----------------|-------------|-----------------|----------------------------------|--------------------------------------------------------------|
| 1              | 2.5884      | 479.01          | 0.1098                           | H → L (0.69431)                                              |
| 2              | 3.1547      | 393.01          | 0.2559                           | H-1 → L (0.66952)<br>H → L+1 (0.18404)                       |
| 3              | 3.4694      | 357.37          | 0.1949                           | H-2 → L (0.42991)<br>H-1 → L (-0.16862)<br>H → L+1 (0.51965) |

**Table S14.** Major theoretical electronic transitions of **3b** (anion).

| Excited states | Energy (eV) | Wavelength (nm) | Oscillator strength ( <i>f</i> ) | description                                                 |
|----------------|-------------|-----------------|----------------------------------|-------------------------------------------------------------|
| 1              | 1.8902      | 655.93          | 0.1877                           | H → L (0.70123)<br>H-2 → L (0.11956)                        |
| 2              | 2.9583      | 419.10          | 0.0027                           | H-1 → L (-0.32687)<br>H → L+1 (0.21909)                     |
| 3              | 3.1089      | 398.80          | 0.2693                           | H-1 → L (0.57851)<br>H → L+1 (0.31021)<br>H → L+2 (0.21909) |

**Table S15.** Major theoretical electronic transitions of **3c** (neutral).

| Excited states | Energy (eV) | Wavelength (nm) | Oscillator strength ( <i>f</i> ) | description                             |
|----------------|-------------|-----------------|----------------------------------|-----------------------------------------|
| 1              | 2.2528      | 550.35          | 0.0936                           | H → L (0.69573)                         |
| 2              | 2.9551      | 419.56          | 0.1842                           | H-1 → L (0.67867)<br>H → L+1 (-0.16235) |
| 3              | 3.2907      | 376.78          | 0.1120                           | H-2 → L (0.68838)<br>H → L+2 (-0.11204) |

**Table S16.** Major theoretical electronic transitions of **3c** (anion).

| Excited states | Energy (eV) | Wavelength (nm) | Oscillator strength ( <i>f</i> ) | description                                                  |
|----------------|-------------|-----------------|----------------------------------|--------------------------------------------------------------|
| 1              | 1.7179      | 721.71          | 0.2833                           | H → L (0.69659)<br>H-2 → L (-0.13334)                        |
| 2              | 2.7672      | 448.05          | 0.0233                           | H-1 → L (0.48521)<br>H → L+1 (0.48180)                       |
| 3              | 2.8245      | 438.96          | 0.0009                           | H-2 → L (0.61892)<br>H-1 → L (0.30295)<br>H → L+1 (-0.13193) |

### 6-3. NICS calculations

**Table S17.** NICS values of **2a** (neutral).

| Ring      | A      | B     | C      | D     | E     | F     |
|-----------|--------|-------|--------|-------|-------|-------|
| NICS (1)  | -10.01 | -6.77 | -9.74  | +0.25 | -8.85 | -7.94 |
| NICS (0)  | -7.68  | -4.51 | -7.91  | +3.63 | -7.13 | -7.15 |
| NICS (-1) | -9.33  | -7.12 | -10.22 | +0.22 | -9.03 | -7.74 |

**Table S18.** NICS values of **2a** (anion).

| Ring      | A     | B     | C     | D     | E     | F     |
|-----------|-------|-------|-------|-------|-------|-------|
| NICS (1)  | -9.07 | -6.58 | -9.98 | -6.02 | -9.96 | -3.07 |
| NICS (0)  | -7.25 | -4.09 | -7.91 | -4.71 | -8.83 | -0.17 |
| NICS (-1) | -9.07 | -6.58 | -9.98 | -6.02 | -9.96 | -3.07 |

**Table S19.** NICS values of **2b** (neutral).

| Ring      | A      | B     | C      | D     | E     | F     |
|-----------|--------|-------|--------|-------|-------|-------|
| NICS (1)  | -10.08 | -6.24 | -9.76  | +0.32 | -8.82 | -7.87 |
| NICS (0)  | -8.95  | -3.98 | -7.91  | +3.67 | -7.15 | -7.10 |
| NICS (-1) | -9.51  | -6.65 | -10.18 | +0.31 | -9.07 | -7.66 |

**Table S20.** NICS values of **2b** (anion).

| Ring      | A     | B     | C     | D     | E     | F     |
|-----------|-------|-------|-------|-------|-------|-------|
| NICS (1)  | -9.53 | -6.27 | -9.92 | +6.00 | -9.97 | -3.13 |
| NICS (0)  | -8.92 | -3.75 | -7.85 | +4.75 | -8.83 | -6.25 |
| NICS (-1) | -9.53 | -6.27 | -9.92 | +6.00 | -9.97 | -3.13 |

**Table S21.** NICS values of **2c** (neutral).

| Ring      | A     | B     | C      | D     | E     | F     |
|-----------|-------|-------|--------|-------|-------|-------|
| NICS (1)  | -9.92 | -6.74 | -9.93  | -0.26 | -8.84 | -7.97 |
| NICS (0)  | -8.24 | -4.34 | -8.07  | +3.09 | -7.13 | -7.12 |
| NICS (-1) | -9.29 | -7.03 | -10.40 | -0.20 | -9.09 | -7.72 |

**Table S22.** NICS values of **2c** (anion).

| Ring      | A     | B     | C      | D     | E      | F     |
|-----------|-------|-------|--------|-------|--------|-------|
| NICS (1)  | -8.61 | -6.30 | -10.12 | -6.23 | -10.04 | -2.84 |
| NICS (0)  | -7.40 | -3.69 | -8.02  | -4.85 | -8.85  | +0.24 |
| NICS (-1) | -8.61 | -6.30 | -10.12 | -6.23 | -10.04 | -2.84 |

**Table S23.** NICS values of **3a** (neutral).

| Ring      | A    | B     | C     | D     | E     | F     |
|-----------|------|-------|-------|-------|-------|-------|
| NICS (1)  | 9.54 | -6.82 | -9.69 | +2.23 | -8.50 | -8.35 |
| NICS (0)  | 8.94 | -4.56 | -7.72 | +6.44 | -6.55 | -6.41 |
| NICS (-1) | 9.54 | -6.82 | -9.69 | +2.23 | -8.50 | -8.35 |

**Table S24.** NICS values of **3a** (anion).

| Ring      | A     | B     | C     | D     | E     | F     |
|-----------|-------|-------|-------|-------|-------|-------|
| NICS (1)  | -5.63 | -4.70 | -8.81 | +3.39 | -8.35 | -6.53 |
| NICS (0)  | -2.92 | -2.51 | -6.91 | +7.62 | -6.50 | -4.46 |
| NICS (-1) | -5.63 | -4.70 | -8.81 | +3.39 | -8.35 | -6.53 |

**Table S25.** NICS values of **3b** (neutral).

| Ring      | A     | B     | C      | D     | E     | F     |
|-----------|-------|-------|--------|-------|-------|-------|
| NICS (1)  | -9.80 | -6.43 | -9.62  | +0.46 | -8.83 | -8.23 |
| NICS (0)  | -8.85 | -4.13 | -7.85  | +3.77 | -7.14 | -7.12 |
| NICS (-1) | -9.16 | -6.81 | -10.20 | +0.39 | -9.03 | -7.87 |

**Table S26.** NICS values of **3b** (anion).

| Ring      | A     | B     | C     | D     | E     | F     |
|-----------|-------|-------|-------|-------|-------|-------|
| NICS (1)  | -5.91 | -4.59 | -8.56 | +2.41 | -8.55 | -7.13 |
| NICS (0)  | -2.86 | -2.47 | -6.81 | +5.98 | -6.93 | -6.04 |
| NICS (-1) | -5.30 | -5.03 | -9.11 | +2.29 | -8.79 | -6.76 |

**Table S27.** NICS values of **3c** (neutral).

| Ring      | A     | B     | C      | D     | E     | F     |
|-----------|-------|-------|--------|-------|-------|-------|
| NICS (1)  | -9.59 | -6.21 | -9.32  | +3.20 | -7.79 | -8.56 |
| NICS (0)  | -8.58 | -4.01 | -7.74  | +7.83 | -5.61 | -6.91 |
| NICS (-1) | -9.05 | -6.69 | -10.27 | +3.33 | -7.75 | -7.98 |

**Table S28.** NICS values of **3c** (anion).

| Ring      | A     | B     | C     | D     | E     | F     |
|-----------|-------|-------|-------|-------|-------|-------|
| NICS (1)  | -4.94 | -3.70 | -8.47 | +3.86 | -7.43 | -5.20 |
| NICS (0)  | -1.50 | -1.59 | -6.82 | +8.39 | -5.51 | -3.43 |
| NICS (-1) | -4.43 | -4.33 | -9.18 | +4.02 | -7.66 | -4.95 |



#### 6-4. Calculated bond lengths

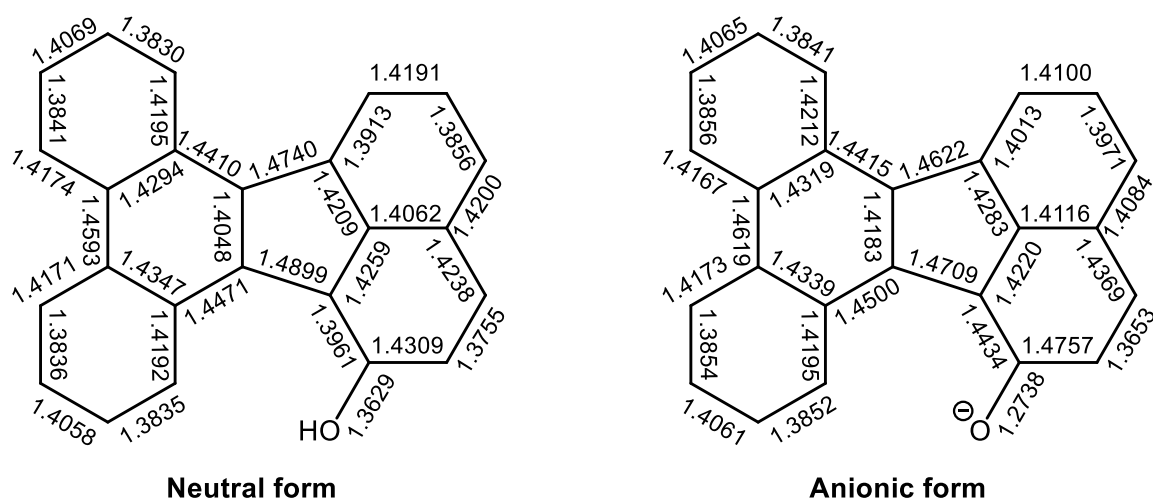

Fig. S11 Calculated bond lengths of neutral (left) and anionic (right) form for 2a.

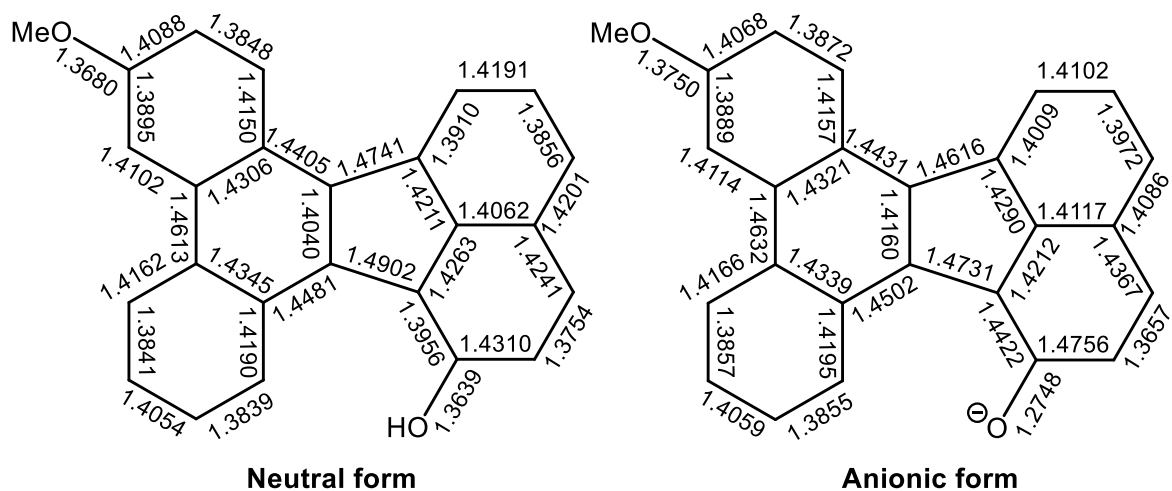

Fig. S12 Calculated bond lengths of neutral (left) and anionic (right) form for 2b.

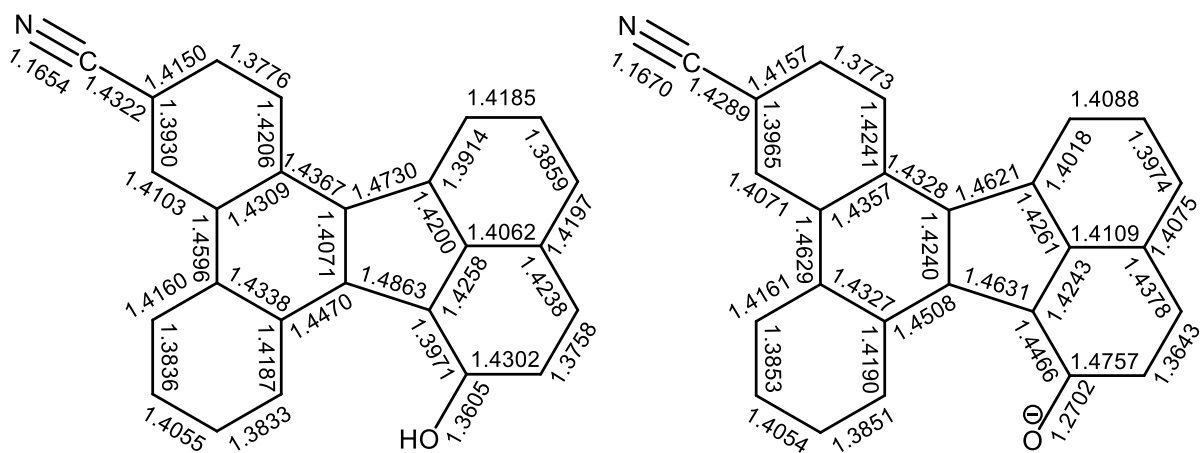

Fig. S13 Calculated bond lengths of neutral (left) and anionic (right) form for 2c.

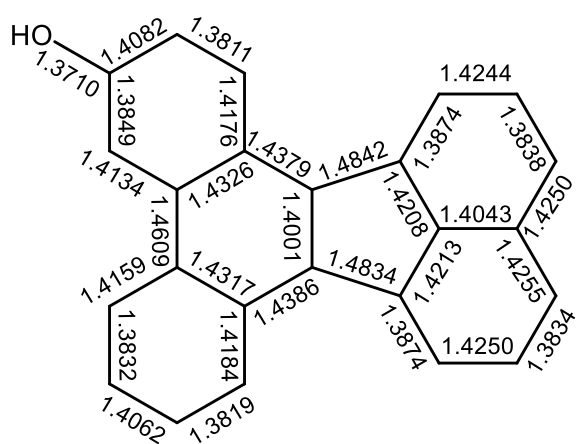

**Neutral form**

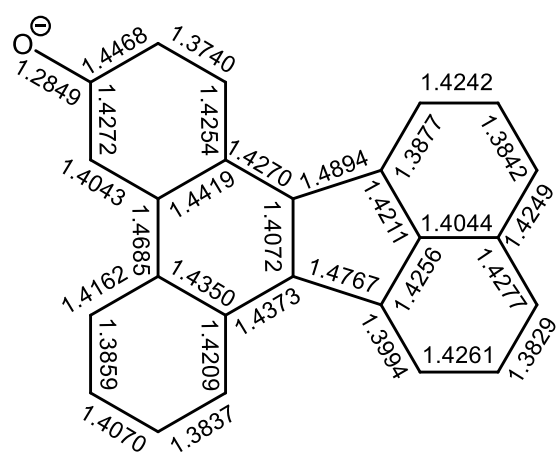

**Anionic form**

**Fig. S14** Calculated bond lengths of neutral (left) and anionic (right) form for **3a**.

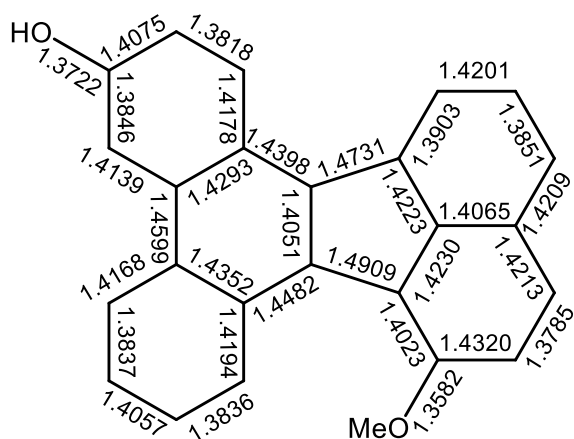

**Neutral form**

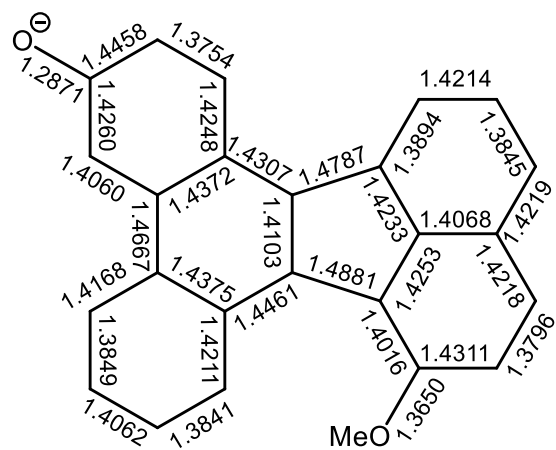

**Anionic form**

**Fig. S15** Calculated bond lengths of neutral (left) and anionic (right) form for **3b**.

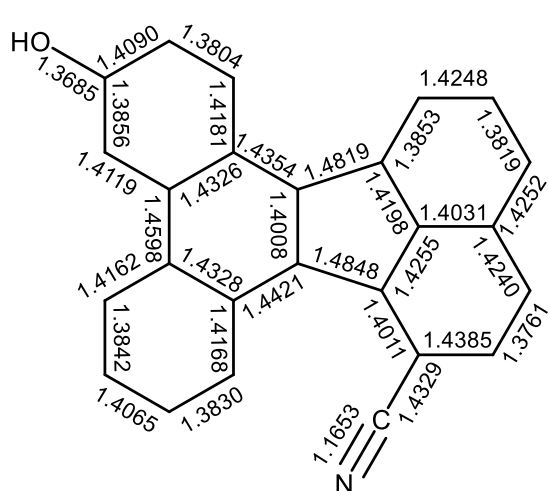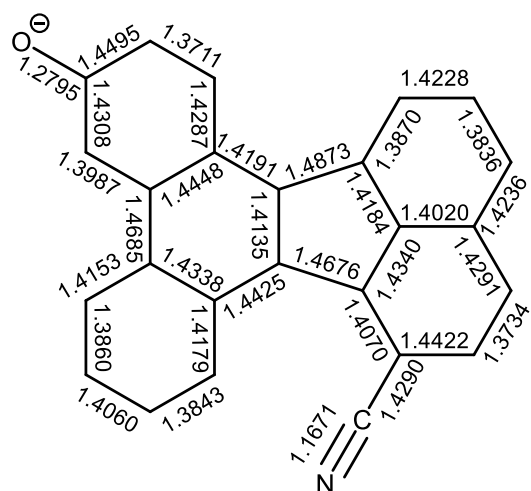

**Fig. S16** Calculated bond lengths of neutral (left) and anionic (right) form for **3c**.

**Optimized structure for 2a (neutral, B3LYP/CPCM(DCM)/6-31+G(d,p))**

|   |             |             |             |
|---|-------------|-------------|-------------|
| C | 3.93805200  | -2.67873700 | 0.21707800  |
| C | 3.81931300  | -1.30217800 | 0.13588800  |
| C | 2.55702300  | -0.66356500 | 0.04683800  |
| C | 1.38298300  | -1.47885900 | 0.04278900  |
| C | 1.53510000  | -2.88675900 | 0.14037900  |
| C | 2.78165400  | -3.47995700 | 0.22284800  |
| C | 2.42935200  | 0.78731600  | -0.04320700 |
| C | 1.13328400  | 1.40250700  | -0.04909300 |
| C | -0.04020400 | 0.55838100  | 0.01871000  |
| C | 0.09297700  | -0.83962400 | -0.01916100 |
| C | 3.57171700  | 1.61991700  | -0.14305000 |
| C | 3.46992400  | 2.99527600  | -0.25477200 |
| C | 2.19937100  | 3.59632000  | -0.27930100 |
| C | 1.06272100  | 2.81391300  | -0.17988700 |
| C | -2.17260200 | -0.36717400 | -0.03717700 |
| C | -3.56727800 | -0.54502700 | -0.06140800 |
| C | -4.05955600 | -1.87036200 | -0.19410500 |
| C | -3.16829500 | -2.92710500 | -0.28729800 |
| C | -1.76393200 | -2.72966100 | -0.23733200 |
| C | -1.24866600 | -1.44498100 | -0.09702900 |
| C | -1.49368400 | 0.88282700  | 0.06220800  |
| C | -2.31580200 | 2.00000200  | 0.22063500  |
| C | -3.73889300 | 1.85238800  | 0.20030900  |
| C | -4.35848300 | 0.63288500  | 0.05567800  |
| H | 4.92130600  | -3.13417300 | 0.28705000  |
| O | -1.80735100 | 3.24855800  | 0.42080900  |
| H | 4.72617100  | -0.71036400 | 0.15196200  |
| H | 0.66066900  | -3.51905500 | 0.17750300  |
| H | 2.86297400  | -4.55993000 | 0.30266800  |
| H | 4.56102100  | 1.17957300  | -0.14662900 |
| H | 4.36808700  | 3.60071800  | -0.33323600 |
| H | 2.10488400  | 4.67358500  | -0.38188300 |
| H | 0.09502200  | 3.28883400  | -0.20578800 |
| H | -5.13096900 | -2.04812800 | -0.22509500 |
| H | -3.54579300 | -3.93909200 | -0.39854100 |
| H | -1.13347100 | -3.60499600 | -0.32478500 |
| H | -4.34211800 | 2.75032200  | 0.31076800  |

|   |             |            |            |
|---|-------------|------------|------------|
| H | -5.44275100 | 0.57057800 | 0.04314000 |
| H | -2.52268500 | 3.89720400 | 0.49315900 |

**Optimized structure for 2a (neutral, B3LYP/6-31+G(d,p))**

|   |             |             |             |
|---|-------------|-------------|-------------|
| C | 3.93448600  | -2.67786700 | 0.22492100  |
| C | 3.81670900  | -1.30292900 | 0.13156100  |
| C | 2.55601900  | -0.66304500 | 0.04283600  |
| C | 1.38238600  | -1.47739700 | 0.04922200  |
| C | 1.53277900  | -2.88337300 | 0.16360200  |
| C | 2.77795600  | -3.47724300 | 0.24650000  |
| C | 2.42875300  | 0.78661900  | -0.05241900 |
| C | 1.13389400  | 1.40291200  | -0.04753100 |
| C | -0.03773200 | 0.55862400  | 0.02319400  |
| C | 0.09439300  | -0.83754200 | -0.01641300 |
| C | 3.56958800  | 1.61812200  | -0.16448400 |
| C | 3.46767900  | 2.99266600  | -0.27377000 |
| C | 2.19824500  | 3.59446100  | -0.28223400 |
| C | 1.06258300  | 2.81378700  | -0.17310800 |
| C | -2.17211300 | -0.36673900 | -0.03639100 |
| C | -3.56572200 | -0.54598300 | -0.06414100 |
| C | -4.05610200 | -1.87125900 | -0.20782700 |
| C | -3.16415500 | -2.92417000 | -0.30984800 |
| C | -1.75994800 | -2.72448000 | -0.25587800 |
| C | -1.24684200 | -1.44272900 | -0.10074600 |
| C | -1.49208100 | 0.88221000  | 0.06845300  |
| C | -2.31444300 | 1.99544800  | 0.23061300  |
| C | -3.73623100 | 1.84746100  | 0.20880700  |
| C | -4.35720800 | 0.62943000  | 0.05829700  |
| H | 4.91766600  | -3.13384100 | 0.29493600  |
| O | -1.81070100 | 3.25002700  | 0.43443900  |
| H | 4.72343400  | -0.71064300 | 0.14049600  |
| H | 0.65562800  | -3.51095000 | 0.21917300  |
| H | 2.85888000  | -4.55625400 | 0.34077000  |
| H | 4.55792300  | 1.17559600  | -0.18050500 |
| H | 4.36540600  | 3.59771000  | -0.36213500 |
| H | 2.10358500  | 4.67219400  | -0.38059900 |
| H | 0.09571300  | 3.28973200  | -0.18770100 |
| H | -5.12737000 | -2.05077000 | -0.24176600 |

|   |             |             |             |
|---|-------------|-------------|-------------|
| H | -3.54012800 | -3.93567300 | -0.43207000 |
| H | -1.12499900 | -3.59551400 | -0.35533200 |
| H | -4.34024600 | 2.74624600  | 0.32063700  |
| H | -5.44174200 | 0.56726000  | 0.04359000  |
| H | -2.53550500 | 3.88279400  | 0.52569600  |

**Optimized structure for 2a (anion, B3LYP/CPCM(DCM)/6-31+G(d,p))**

|   |             |             |             |
|---|-------------|-------------|-------------|
| C | -3.92868100 | -2.69284300 | -0.03226800 |
| C | -3.80515900 | -1.31283900 | -0.01641700 |
| C | -2.54329000 | -0.66899000 | -0.00402500 |
| C | -1.36230400 | -1.47870100 | -0.00740700 |
| C | -1.52192600 | -2.89079300 | -0.02733900 |
| C | -2.76971500 | -3.48973600 | -0.03891600 |
| C | -2.41984800 | 0.78762600  | 0.00990800  |
| C | -1.12559400 | 1.40471800  | 0.00471000  |
| C | 0.06160200  | 0.57236500  | -0.00550800 |
| C | -0.07020700 | -0.83972000 | 0.00237000  |
| C | -3.56276600 | 1.62561200  | 0.02943300  |
| C | -3.46156400 | 3.00723500  | 0.04262800  |
| C | -2.19112400 | 3.60966100  | 0.03692400  |
| C | -1.05162600 | 2.82225300  | 0.01846000  |
| C | 2.18033900  | -0.32577800 | 0.00348100  |
| C | 3.58100300  | -0.50086400 | 0.00835700  |
| C | 4.08693000  | -1.81502600 | 0.03054300  |
| C | 3.20796800  | -2.90079500 | 0.04752500  |
| C | 1.80986700  | -2.71836300 | 0.03969000  |
| C | 1.26931700  | -1.42580100 | 0.01457800  |
| C | 1.49130900  | 0.91805200  | -0.01174400 |
| C | 2.28213900  | 2.12528200  | -0.03669400 |
| C | 3.74339000  | 1.91956100  | -0.03059200 |
| C | 4.36412600  | 0.70370000  | -0.00916800 |
| O | 1.85974500  | 3.32664500  | -0.06507400 |
| H | -4.91348000 | -3.15086100 | -0.04214600 |
| H | -4.71296400 | -0.72126000 | -0.01601500 |
| H | -0.64816200 | -3.52515800 | -0.03931700 |
| H | -2.84858900 | -4.57332000 | -0.05532400 |
| H | -4.55374200 | 1.18764600  | 0.03620500  |
| H | -4.36190700 | 3.61547800  | 0.05792400  |

|   |             |             |             |
|---|-------------|-------------|-------------|
| H | -2.09963000 | 4.69280000  | 0.04739500  |
| H | -0.06393900 | 3.27379300  | 0.01170700  |
| H | 5.16190500  | -1.98123200 | 0.03587300  |
| H | 3.60449400  | -3.91223700 | 0.06745200  |
| H | 1.19117600  | -3.60726500 | 0.05748200  |
| H | 4.33096400  | 2.83455500  | -0.04566300 |
| H | 5.45080700  | 0.63900600  | -0.00614200 |

**Optimized structure for 2a (anion, B3LYP/6-31+G(d,p))**

|   |             |             |             |
|---|-------------|-------------|-------------|
| C | 3.93786700  | -2.68351400 | 0.00000400  |
| C | 3.80557900  | -1.30374700 | 0.00000000  |
| C | 2.54387600  | -0.66331800 | -0.00000100 |
| C | 1.36374000  | -1.47697700 | 0.00000200  |
| C | 1.53237300  | -2.88882300 | 0.00000800  |
| C | 2.78151700  | -3.48354500 | 0.00000900  |
| C | 2.41524000  | 0.79286700  | -0.00000300 |
| C | 1.11882900  | 1.40446800  | 0.00000000  |
| C | -0.06513100 | 0.56878000  | 0.00000200  |
| C | 0.07185300  | -0.84647300 | 0.00000000  |
| C | 3.55363500  | 1.63590200  | -0.00000700 |
| C | 3.44546700  | 3.01679600  | -0.00000700 |
| C | 2.17220600  | 3.61212900  | -0.00000400 |
| C | 1.03554900  | 2.82142300  | 0.00000000  |
| C | -2.17565700 | -0.33093100 | 0.00000000  |
| C | -3.57639500 | -0.50656000 | -0.00000100 |
| C | -4.08106500 | -1.81837000 | -0.00000600 |
| C | -3.20285200 | -2.90692900 | -0.00001000 |
| C | -1.80651400 | -2.72458800 | -0.00000800 |
| C | -1.26427400 | -1.43241500 | -0.00000200 |
| C | -1.48732700 | 0.91052500  | 0.00000300  |
| C | -2.27634500 | 2.12654800  | 0.00000500  |
| C | -3.74293900 | 1.91589400  | 0.00000500  |
| C | -4.35954300 | 0.70084000  | 0.00000200  |
| O | -1.86117400 | 3.31830200  | 0.00000800  |
| H | 4.92571100  | -3.13715200 | 0.00000400  |
| H | 4.70989400  | -0.70573200 | -0.00000300 |
| H | 0.65835800  | -3.52334900 | 0.00001400  |
| H | 2.86344500  | -4.56805300 | 0.00001400  |

|   |             |             |             |
|---|-------------|-------------|-------------|
| H | 4.54678200  | 1.20094500  | -0.00001000 |
| H | 4.34402900  | 3.62997700  | -0.00001000 |
| H | 2.07278900  | 4.69513700  | -0.00000400 |
| H | 0.04480000  | 3.26985800  | 0.00000200  |
| H | -5.15719200 | -1.98396600 | -0.00000700 |
| H | -3.60122300 | -3.91887100 | -0.00001400 |
| H | -1.18559100 | -3.61300000 | -0.00001300 |
| H | -4.32314200 | 2.83557100  | 0.00000700  |
| H | -5.44739300 | 0.63233600  | 0.00000200  |

**Optimized structure for 2b (neutral, B3LYP/CPCM(DCM)/6-31+G(d,p))**

|   |             |             |             |
|---|-------------|-------------|-------------|
| C | 4.10015700  | -0.81289400 | 0.09644200  |
| C | 3.45281600  | 0.41548600  | 0.04321700  |
| C | 2.04734300  | 0.51488000  | -0.01510800 |
| C | 1.27202200  | -0.68738400 | -0.01729700 |
| C | 1.96170700  | -1.92093700 | 0.05242800  |
| C | 3.34311500  | -2.00100100 | 0.10579900  |
| C | 1.36898800  | 1.80762300  | -0.07770800 |
| C | -0.06372000 | 1.87638900  | -0.05704800 |
| C | -0.82426300 | 0.64593100  | 0.01056300  |
| C | -0.16494700 | -0.59221800 | -0.04853000 |
| C | 2.10268500  | 3.01492700  | -0.17631900 |
| C | 1.47997900  | 4.24810500  | -0.26079100 |
| C | 0.07622200  | 4.31495100  | -0.25745600 |
| C | -0.67152000 | 3.15454100  | -0.15944700 |
| C | -2.43855400 | -1.02800000 | -0.03081000 |
| C | -3.65741400 | -1.72912300 | -0.03993300 |
| C | -3.60291700 | -3.14121100 | -0.18075900 |
| C | -2.37510800 | -3.77282600 | -0.29653700 |
| C | -1.15449400 | -3.04975500 | -0.26308600 |
| C | -1.17193800 | -1.66669600 | -0.11557000 |
| C | -2.29038800 | 0.38665600  | 0.07421800  |
| C | -3.47691600 | 1.09951600  | 0.25195600  |
| C | -4.73397500 | 0.41581800  | 0.24682800  |
| C | -4.83975800 | -0.94741900 | 0.09840500  |
| O | -3.48809000 | 2.44798600  | 0.45593000  |
| O | 5.46663800  | -0.77310800 | 0.14801600  |
| C | 6.18712700  | -2.00640100 | 0.21271900  |

|   |             |             |             |
|---|-------------|-------------|-------------|
| H | 4.07851000  | 1.29885900  | 0.05743800  |
| H | 1.40629900  | -2.84614000 | 0.09050400  |
| H | 3.81762100  | -2.97274800 | 0.16509300  |
| H | 3.18513800  | 2.98684500  | -0.20004200 |
| H | 2.07584100  | 5.15265000  | -0.33892500 |
| H | -0.42668400 | 5.27452900  | -0.33740100 |
| H | -1.74770800 | 3.22236300  | -0.16371500 |
| H | -4.52324100 | -3.71842900 | -0.20029600 |
| H | -2.33559500 | -4.85161600 | -0.41365900 |
| H | -0.23698000 | -3.61436800 | -0.36799600 |
| H | -5.63375600 | 1.01354100  | 0.37190600  |
| H | -5.81679300 | -1.42177800 | 0.09791900  |
| H | -4.39831400 | 2.76679400  | 0.54216600  |
| H | 7.24134900  | -1.73069000 | 0.24074700  |
| H | 5.93297600  | -2.56763700 | 1.11886700  |
| H | 5.99546000  | -2.62493400 | -0.67122400 |

**Optimized structure for 2b (neutral, B3LYP/6-31+G(d,p))**

|   |             |             |             |
|---|-------------|-------------|-------------|
| C | 4.09586200  | -0.81730800 | 0.10113900  |
| C | 3.45108700  | 0.41058800  | 0.03844500  |
| C | 2.04695900  | 0.51237400  | -0.02094100 |
| C | 1.27044200  | -0.68867800 | -0.01626200 |
| C | 1.95654200  | -1.92194200 | 0.06675200  |
| C | 3.33774800  | -2.00355200 | 0.12185600  |
| C | 1.37033700  | 1.80490100  | -0.08790900 |
| C | -0.06124800 | 1.87623900  | -0.05828700 |
| C | -0.82112800 | 0.64679400  | 0.01267600  |
| C | -0.16505300 | -0.59066500 | -0.05023800 |
| C | 2.10441900  | 3.00975000  | -0.19736000 |
| C | 1.48303800  | 4.24256900  | -0.28126100 |
| C | 0.08038800  | 4.31150600  | -0.26549500 |
| C | -0.66832100 | 3.15371800  | -0.15829600 |
| C | -2.43928700 | -1.02553900 | -0.03113700 |
| C | -3.65749400 | -1.72581900 | -0.04149500 |
| C | -3.60392100 | -3.13694100 | -0.19447300 |
| C | -2.37821700 | -3.76642600 | -0.32175000 |
| C | -1.15751600 | -3.04300300 | -0.28592400 |
| C | -1.17316100 | -1.66354000 | -0.12318900 |



|   |             |             |             |
|---|-------------|-------------|-------------|
| C | -2.28755000 | 0.38813200  | 0.08070700  |
| C | -3.47117800 | 1.09886800  | 0.26732600  |
| C | -4.72795600 | 0.41680300  | 0.26282800  |
| C | -4.83763600 | -0.94516600 | 0.10644400  |
| O | -3.48433400 | 2.45026600  | 0.47886600  |
| O | 5.46345700  | -0.77666300 | 0.15269300  |
| C | 6.18020700  | -2.00217600 | 0.22917900  |
| H | 4.08075500  | 1.29081500  | 0.04898800  |
| H | 1.39596600  | -2.84364700 | 0.11945600  |
| H | 3.81140000  | -2.97528000 | 0.19332500  |
| H | 3.18651600  | 2.97795100  | -0.23100300 |
| H | 2.07943400  | 5.14616700  | -0.36820000 |
| H | -0.42176500 | 5.27174900  | -0.34348200 |
| H | -1.74386900 | 3.22352300  | -0.15384600 |
| H | -4.52469600 | -3.71383700 | -0.21538900 |
| H | -2.33958200 | -4.84413800 | -0.45053400 |
| H | -0.23861600 | -3.60311300 | -0.40431900 |
| H | -5.62829100 | 1.01480000  | 0.39354600  |
| H | -5.81544500 | -1.41860200 | 0.10577800  |
| H | -4.39503700 | 2.75543500  | 0.58577300  |
| H | 7.23548100  | -1.72732500 | 0.25458600  |
| H | 5.92909700  | -2.55861100 | 1.14110300  |
| H | 5.99148600  | -2.63360700 | -0.64827100 |

**Optimized structure for 2b (anion, B3LYP/CPCM(DCM)/6-31+G(d,p))**

|   |             |             |             |
|---|-------------|-------------|-------------|
| C | -4.09019100 | -0.81995100 | 0.00000100  |
| C | -3.43997700 | 0.40737000  | 0.00000000  |
| C | -2.03228400 | 0.50919400  | 0.00000000  |
| C | -1.25171500 | -0.69145000 | 0.00000000  |
| C | -1.94866400 | -1.92374300 | 0.00000100  |
| C | -3.33342100 | -2.00590100 | 0.00000100  |
| C | -1.35610900 | 1.80681700  | 0.00000000  |
| C | 0.07606500  | 1.87615300  | 0.00000000  |
| C | 0.85254200  | 0.65129300  | 0.00000000  |
| C | 0.18843400  | -0.59932100 | 0.00000000  |
| C | -2.08840800 | 3.01943400  | 0.00000000  |
| C | -1.46342000 | 4.25613400  | -0.00000100 |
| C | -0.05903600 | 4.32192100  | -0.00000100 |

|   |             |             |             |
|---|-------------|-------------|-------------|
| C | 0.68968100  | 3.15617800  | -0.00000100 |
| C | 2.46374300  | -0.99248100 | 0.00000000  |
| C | 3.68820400  | -1.69513200 | 0.00000000  |
| C | 3.64671000  | -3.10310600 | 0.00000000  |
| C | 2.41650100  | -3.76542600 | 0.00000000  |
| C | 1.19715300  | -3.05694400 | 0.00000000  |
| C | 1.19815500  | -1.65606900 | 0.00000000  |
| C | 2.30741400  | 0.42011200  | 0.00000000  |
| C | 3.50139200  | 1.22911100  | -0.00000100 |
| C | 4.77026900  | 0.47583400  | -0.00000100 |
| C | 4.87528400  | -0.88577500 | 0.00000000  |
| O | 3.57508500  | 2.50175200  | -0.00000100 |
| O | -5.46458100 | -0.77973300 | 0.00000100  |
| C | -6.17908500 | -2.01493600 | 0.00000200  |
| H | -4.06499000 | 1.29189600  | 0.00000000  |
| H | -1.39520100 | -2.85108700 | 0.00000100  |
| H | -3.80760100 | -2.98006100 | 0.00000100  |
| H | -3.17178700 | 2.99588200  | 0.00000000  |
| H | -2.06002100 | 5.16431600  | -0.00000100 |
| H | 0.44280200  | 5.28625800  | -0.00000100 |
| H | 1.77536400  | 3.19228500  | -0.00000100 |
| H | 4.57382800  | -3.67208000 | 0.00000000  |
| H | 2.39171800  | -4.85175100 | 0.00000000  |
| H | 0.28272700  | -3.63785200 | 0.00000000  |
| H | 5.66499800  | 1.09394400  | -0.00000100 |
| H | 5.85332800  | -1.36384900 | 0.00000000  |
| H | -7.23614400 | -1.74699100 | 0.00000200  |
| H | -5.95423700 | -2.60647300 | -0.89531200 |
| H | -5.95423700 | -2.60647300 | 0.89531500  |

**Optimized structure for 2b (anion, B3LYP/6-31+G(d,p))**

|   |            |             |             |
|---|------------|-------------|-------------|
| C | 4.08954100 | -0.81541000 | -0.00000100 |
| C | 3.43790400 | 0.40870100  | 0.00000200  |
| C | 2.03066200 | 0.50949700  | 0.00000200  |
| C | 1.25087100 | -0.69356600 | -0.00000100 |
| C | 1.95212500 | -1.92302900 | -0.00000700 |
| C | 3.33809300 | -2.00221600 | -0.00000700 |
| C | 1.35216200 | 1.80533600  | 0.00000300  |

|   |             |             |             |
|---|-------------|-------------|-------------|
| C | -0.07975700 | 1.87096400  | 0.00000000  |
| C | -0.85399900 | 0.64557100  | -0.00000100 |
| C | -0.18636900 | -0.60700000 | 0.00000000  |
| C | 2.08096500  | 3.01914800  | 0.00000700  |
| C | 1.45175600  | 4.25326800  | 0.00000600  |
| C | 0.04748400  | 4.31380000  | 0.00000300  |
| C | -0.69958800 | 3.14780300  | -0.00000100 |
| C | -2.45947100 | -0.99342300 | -0.00000100 |
| C | -3.68494500 | -1.69449700 | 0.00000000  |
| C | -3.64581600 | -3.09954100 | 0.00000500  |
| C | -2.41633200 | -3.76700900 | 0.00000900  |
| C | -1.19741700 | -3.06161300 | 0.00000800  |
| C | -1.19409600 | -1.66042100 | 0.00000200  |
| C | -2.30056600 | 0.41613400  | -0.00000300 |
| C | -3.49482400 | 1.23606600  | -0.00000500 |
| C | -4.76831900 | 0.47829600  | -0.00000500 |
| C | -4.87182000 | -0.88055600 | -0.00000300 |
| O | -3.56862900 | 2.49642100  | -0.00000700 |
| O | 5.47427800  | -0.77038700 | 0.00000000  |
| C | 6.17718700  | -1.99707700 | -0.00000400 |
| H | 4.06259200  | 1.29352800  | 0.00000500  |
| H | 1.39599900  | -2.84905300 | -0.00001300 |
| H | 3.81382600  | -2.97659900 | -0.00001200 |
| H | 3.16499200  | 2.99665600  | 0.00001000  |
| H | 2.04621100  | 5.16423300  | 0.00000900  |
| H | -0.45988800 | 5.27581800  | 0.00000200  |
| H | -1.78675100 | 3.18194200  | -0.00000300 |
| H | -4.57537200 | -3.66652100 | 0.00000600  |
| H | -2.39527800 | -4.85438600 | 0.00001400  |
| H | -0.28210000 | -3.64275600 | 0.00001300  |
| H | -5.65715700 | 1.10482100  | -0.00000700 |
| H | -5.85012500 | -1.36126100 | -0.00000200 |
| H | 7.23844700  | -1.73778800 | -0.00000200 |
| H | 5.95341900  | -2.59614100 | 0.89412200  |
| H | 5.95342100  | -2.59613400 | -0.89413500 |

**Optimized structure for 2c (neutral, B3LYP/CPCM(DCM)/6-31+G(d,p))**

|   |            |             |            |
|---|------------|-------------|------------|
| C | 4.09484800 | -1.29228600 | 0.13313300 |
|---|------------|-------------|------------|

|   |             |             |             |
|---|-------------|-------------|-------------|
| C | 3.57567000  | -0.00141600 | 0.06586700  |
| C | 2.18689900  | 0.23216300  | -0.01025500 |
| C | 1.30411100  | -0.89394400 | -0.01441700 |
| C | 1.86371800  | -2.19706300 | 0.06786300  |
| C | 3.22344500  | -2.40705800 | 0.13705900  |
| C | 1.64129400  | 1.58368700  | -0.08802300 |
| C | 0.22228200  | 1.78809900  | -0.07116100 |
| C | -0.64890300 | 0.63547600  | 0.00768300  |
| C | -0.11348900 | -0.66417200 | -0.05671400 |
| C | 2.48700600  | 2.71380700  | -0.20068800 |
| C | 1.98114600  | 3.99746600  | -0.30448000 |
| C | 0.58991700  | 4.19681900  | -0.30858300 |
| C | -0.26450100 | 3.11479400  | -0.19566900 |
| C | -2.41492800 | -0.87336300 | -0.03455100 |
| C | -3.69779500 | -1.44908400 | -0.04185800 |
| C | -3.78530400 | -2.85778200 | -0.19485800 |
| C | -2.62682300 | -3.60789700 | -0.32149900 |
| C | -1.34035500 | -3.01129400 | -0.28642200 |
| C | -1.21965600 | -1.63420800 | -0.12789100 |
| C | -2.12879200 | 0.51865100  | 0.08133600  |
| C | -3.23644800 | 1.34590600  | 0.28309600  |
| C | -4.55459900 | 0.79090100  | 0.27740200  |
| C | -4.79413600 | -0.55379100 | 0.11236000  |
| O | -3.10554200 | 2.68051200  | 0.51239800  |
| C | 5.51143900  | -1.48765100 | 0.21152000  |
| N | 6.66323500  | -1.65373100 | 0.27464100  |
| H | 4.27179400  | 0.82636300  | 0.08385500  |
| H | 1.21439200  | -3.05825900 | 0.10359600  |
| H | 3.62432800  | -3.41225600 | 0.20551100  |
| H | 3.56225000  | 2.58732800  | -0.22329900 |
| H | 2.65909700  | 4.84085700  | -0.39377000 |
| H | 0.18094200  | 5.19813800  | -0.40653600 |
| H | -1.32943900 | 3.28313600  | -0.20644300 |
| H | -4.75869100 | -3.33987900 | -0.21502200 |
| H | -2.69564100 | -4.68399000 | -0.44808500 |
| H | -0.48450300 | -3.66413100 | -0.40019500 |
| H | -5.39058100 | 1.47218500  | 0.41596900  |
| H | -5.81342000 | -0.92882600 | 0.11306400  |

|   |             |            |            |
|---|-------------|------------|------------|
| H | -3.97510200 | 3.09079000 | 0.62819000 |
|---|-------------|------------|------------|

**Optimized structure for 2c (neutral, B3LYP/6-31+G(d,p))**

|   |             |             |             |
|---|-------------|-------------|-------------|
| C | 4.09714400  | -1.29147600 | 0.13103200  |
| C | 3.57545500  | -0.00327200 | 0.05612600  |
| C | 2.18621300  | 0.23274900  | -0.01374400 |
| C | 1.30334800  | -0.89165100 | -0.00725900 |
| C | 1.86258600  | -2.19309500 | 0.08829600  |
| C | 3.22262800  | -2.40269600 | 0.15272700  |
| C | 1.64047300  | 1.58333000  | -0.09136000 |
| C | 0.22204300  | 1.78966500  | -0.06598700 |
| C | -0.64833900 | 0.63740700  | 0.01016000  |
| C | -0.11369600 | -0.66032500 | -0.05150600 |
| C | 2.48583700  | 2.71256800  | -0.20700700 |
| C | 1.98157600  | 3.99647600  | -0.30176900 |
| C | 0.59146200  | 4.19756000  | -0.29182600 |
| C | -0.26337100 | 3.11718400  | -0.17793600 |
| C | -2.41582000 | -0.87383300 | -0.03112200 |
| C | -3.69638800 | -1.45298500 | -0.04003500 |
| C | -3.78033600 | -2.86195200 | -0.19541500 |
| C | -2.62160500 | -3.60725100 | -0.32638100 |
| C | -1.33691100 | -3.00616200 | -0.29081000 |
| C | -1.21880100 | -1.63152700 | -0.12498100 |
| C | -2.13041300 | 0.51864000  | 0.08187000  |
| C | -3.23955400 | 1.34167600  | 0.27452300  |
| C | -4.55526800 | 0.78351800  | 0.27246700  |
| C | -4.79409200 | -0.56171500 | 0.11270800  |
| O | -3.11910700 | 2.68448100  | 0.48960500  |
| C | 5.51557600  | -1.48829600 | 0.20155300  |
| N | 6.66689000  | -1.65429600 | 0.25778900  |
| H | 4.27283800  | 0.82380800  | 0.06472800  |
| H | 1.21011900  | -3.05140600 | 0.14270900  |
| H | 3.62555800  | -3.40657500 | 0.23226800  |
| H | 3.56062700  | 2.58303200  | -0.23825700 |
| H | 2.66007800  | 4.83937500  | -0.39335900 |
| H | 0.18312400  | 5.20019700  | -0.37963100 |
| H | -1.32747000 | 3.28765400  | -0.17811800 |
| H | -4.75254400 | -3.34685000 | -0.21565300 |

|   |             |             |             |
|---|-------------|-------------|-------------|
| H | -2.68773900 | -4.68309600 | -0.45766600 |
| H | -0.47771000 | -3.65333400 | -0.41315500 |
| H | -5.39402200 | 1.46394500  | 0.40763200  |
| H | -5.81293500 | -0.93870000 | 0.11416900  |
| H | -3.99378100 | 3.07895700  | 0.60702300  |

**Optimized structure for 2c (anion, B3LYP/CPCM(DCM)/6-31+G(d,p))**

|   |             |             |             |
|---|-------------|-------------|-------------|
| C | -4.08679300 | -1.30250900 | -0.00000300 |
| C | -3.55965300 | -0.00936500 | 0.00000000  |
| C | -2.17268100 | 0.22798600  | 0.00000100  |
| C | -1.27999600 | -0.89640800 | -0.00000100 |
| C | -1.84998100 | -2.20141400 | -0.00000500 |
| C | -3.21070100 | -2.41460400 | -0.00000600 |
| C | -1.62867100 | 1.58591900  | 0.00000300  |
| C | -0.21101100 | 1.79261600  | 0.00000100  |
| C | 0.67849400  | 0.64652400  | -0.00000100 |
| C | 0.13470000  | -0.66951700 | 0.00000100  |
| C | -2.47528200 | 2.72107900  | 0.00000700  |
| C | -1.97111200 | 4.01141200  | 0.00000800  |
| C | -0.58021900 | 4.21251900  | 0.00000600  |
| C | 0.27743800  | 3.12484800  | 0.00000200  |
| C | 2.43308000  | -0.83967500 | 0.00000000  |
| C | 3.72097700  | -1.41570800 | 0.00000000  |
| C | 3.82094500  | -2.81967800 | 0.00000500  |
| C | 2.66277800  | -3.60157900 | 0.00000800  |
| C | 1.37996200  | -3.01915400 | 0.00000700  |
| C | 1.24214400  | -1.62414700 | 0.00000200  |
| C | 2.13868700  | 0.55390200  | -0.00000300 |
| C | 3.25245900  | 1.47709200  | -0.00000600 |
| C | 4.58893100  | 0.85132400  | -0.00000600 |
| C | 4.82340400  | -0.49266900 | -0.00000300 |
| O | 3.20021900  | 2.74623900  | -0.00001000 |
| C | -5.50217500 | -1.49828500 | -0.00000400 |
| N | -6.65711800 | -1.66531500 | -0.00000400 |
| H | -4.25670400 | 0.81841100  | 0.00000200  |
| H | -1.20280100 | -3.06475100 | -0.00000900 |
| H | -3.61054200 | -3.42307900 | -0.00001000 |
| H | -3.55152300 | 2.59683800  | 0.00000900  |

|   |             |             |             |
|---|-------------|-------------|-------------|
| H | -2.65230900 | 4.85769700  | 0.00001100  |
| H | -0.17391300 | 5.22053600  | 0.00000700  |
| H | 1.35388100  | 3.26625500  | 0.00000000  |
| H | 4.80023200  | -3.29276500 | 0.00000500  |
| H | 2.74651100  | -4.68476400 | 0.00001200  |
| H | 0.52936100  | -3.68957400 | 0.00001100  |
| H | 5.41878100  | 1.55382300  | -0.00000800 |
| H | 5.84273500  | -0.87438800 | -0.00000300 |

**Optimized structure for 2c (anion, B3LYP/6-31+G(d,p))**

|   |             |             |             |
|---|-------------|-------------|-------------|
| C | 4.09594400  | -1.29351400 | 0.00000700  |
| C | 3.55724300  | -0.00364400 | -0.00000200 |
| C | 2.17138500  | 0.23160100  | -0.00000300 |
| C | 1.27914300  | -0.89569700 | 0.00000300  |
| C | 1.85805800  | -2.19802600 | 0.00001700  |
| C | 3.21924900  | -2.40553300 | 0.00001900  |
| C | 1.62209400  | 1.58788900  | -0.00000800 |
| C | 0.20412300  | 1.79002600  | -0.00000100 |
| C | -0.68209700 | 0.64206600  | 0.00000300  |
| C | -0.13232300 | -0.67567000 | -0.00000100 |
| C | 2.46347900  | 2.72608600  | -0.00001800 |
| C | 1.95364400  | 4.01390900  | -0.00001900 |
| C | 0.56238700  | 4.20860100  | -0.00001000 |
| C | -0.29215300 | 3.11912900  | -0.00000100 |
| C | -2.42875800 | -0.84399000 | 0.00000100  |
| C | -3.71637900 | -1.42030300 | -0.00000100 |
| C | -3.81554400 | -2.82183500 | -0.00001300 |
| C | -2.65746000 | -3.60602800 | -0.00002400 |
| C | -1.37627100 | -3.02405100 | -0.00002100 |
| C | -1.23729200 | -1.62925600 | -0.00000600 |
| C | -2.13415000 | 0.54776400  | 0.00000700  |
| C | -3.24916000 | 1.47902300  | 0.00001500  |
| C | -4.58915000 | 0.84709600  | 0.00001500  |
| C | -4.81976600 | -0.49481500 | 0.00000700  |
| O | -3.20058400 | 2.73748600  | 0.00002200  |
| C | 5.51190800  | -1.48564400 | 0.00000700  |
| N | 6.66762900  | -1.65164900 | 0.00000700  |
| H | 4.25080200  | 0.82772000  | -0.00000800 |

|   |             |             |             |
|---|-------------|-------------|-------------|
| H | 1.21013100  | -3.06140100 | 0.00003100  |
| H | 3.62414100  | -3.41280000 | 0.00003000  |
| H | 3.54067900  | 2.60423300  | -0.00002500 |
| H | 2.63225900  | 4.86357800  | -0.00002700 |
| H | 0.14936000  | 5.21437300  | -0.00001000 |
| H | -1.37034900 | 3.25725700  | 0.00000600  |
| H | -4.79583700 | -3.29495000 | -0.00001500 |
| H | -2.74268200 | -4.68990800 | -0.00003600 |
| H | -0.52329300 | -3.69261000 | -0.00003400 |
| H | -5.41384800 | 1.55537700  | 0.00002100  |
| H | -5.83901900 | -0.88030400 | 0.00000700  |

**Optimized structure for 3a (neutral, B3LYP/CPCM(DCM)/6-31+G(d,p))**

|   |             |             |             |
|---|-------------|-------------|-------------|
| C | -3.86417800 | -1.91478600 | 0.00001300  |
| C | -3.57568600 | -0.56030700 | 0.00001000  |
| C | -2.24276700 | -0.09010000 | 0.00000600  |
| C | -1.17601800 | -1.04636800 | 0.00000500  |
| C | -1.51162900 | -2.42364700 | 0.00000700  |
| C | -2.82157400 | -2.86130800 | 0.00001100  |
| C | -1.93670500 | 1.33838600  | 0.00000200  |
| C | -0.57357600 | 1.77886900  | -0.00000400 |
| C | 0.47608000  | 0.79400100  | -0.00000500 |
| C | 0.18236000  | -0.57496300 | 0.00000200  |
| C | -2.95902100 | 2.31937100  | 0.00000400  |
| C | -2.67333300 | 3.67368600  | 0.00000000  |
| C | -1.33405700 | 4.10533500  | -0.00000600 |
| C | -0.31219900 | 3.17379900  | -0.00000800 |
| C | 2.49003200  | -0.35362400 | -0.00000500 |
| C | 3.86301100  | -0.64850300 | -0.00000700 |
| C | 4.22225100  | -2.02749500 | 0.00000000  |
| C | 3.23113700  | -2.99325900 | 0.00001000  |
| C | 1.84537400  | -2.66398300 | 0.00001100  |
| C | 1.45926700  | -1.33140300 | 0.00000300  |
| C | 1.95005800  | 0.96112200  | -0.00001100 |
| C | 2.84995900  | 2.01709200  | -0.00002000 |
| C | 4.24935200  | 1.74808100  | -0.00002300 |
| C | 4.75754500  | 0.46139700  | -0.00001700 |
| O | -5.18433900 | -2.28453900 | 0.00001800  |



|   |             |             |             |
|---|-------------|-------------|-------------|
| H | 2.54139300  | 3.05495000  | -0.00002500 |
| H | -4.41316600 | 0.12558600  | 0.00001100  |
| H | -0.72881300 | -3.16772600 | 0.00000400  |
| H | -3.04405400 | -3.92498200 | 0.00001100  |
| H | -3.99915900 | 2.01708600  | 0.00000800  |
| H | -3.48255300 | 4.39764300  | 0.00000100  |
| H | -1.10018300 | 5.16580000  | -0.00000900 |
| H | 0.70911500  | 3.52550400  | -0.00001200 |
| H | 5.26982700  | -2.31572600 | -0.00000100 |
| H | 3.50937500  | -4.04300200 | 0.00001600  |
| H | 1.13785900  | -3.48360400 | 0.00002000  |
| H | 4.93356000  | 2.59146100  | -0.00003000 |
| H | 5.83103100  | 0.29387300  | -0.00001900 |
| H | -5.26362400 | -3.24892100 | 0.00002000  |

**Optimized structure for 3a (neutral, B3LYP/6-31+G(d,p))**

|   |             |             |             |
|---|-------------|-------------|-------------|
| C | 3.86304000  | -1.91399400 | 0.00011200  |
| C | 3.57415700  | -0.56087800 | 0.00005100  |
| C | 2.24222500  | -0.09079100 | 0.00000300  |
| C | 1.17514900  | -1.04637900 | 0.00000600  |
| C | 1.51029900  | -2.42256700 | 0.00010200  |
| C | 2.82051100  | -2.85911700 | 0.00015000  |
| C | 1.93637200  | 1.33692400  | -0.00004500 |
| C | 0.57411300  | 1.77727300  | -0.00003300 |
| C | -0.47520700 | 0.79311200  | 0.00002000  |
| C | -0.18246300 | -0.57485900 | -0.00003500 |
| C | 2.95798100  | 2.31727100  | -0.00010700 |
| C | 2.67350100  | 3.67088400  | -0.00016600 |
| C | 1.33516600  | 4.10252200  | -0.00018300 |
| C | 0.31391900  | 3.17160200  | -0.00012200 |
| C | -2.49014300 | -0.35313400 | 0.00000500  |
| C | -3.86247700 | -0.64708600 | 0.00001200  |
| C | -4.22195200 | -2.02519900 | -0.00014300 |
| C | -3.23221400 | -2.99089700 | -0.00029400 |
| C | -1.84709300 | -2.66170100 | -0.00027800 |
| C | -1.45960200 | -1.33056000 | -0.00010300 |
| C | -1.94898600 | 0.96056900  | 0.00010100  |
| C | -2.84820900 | 2.01569300  | 0.00027800  |

|   |             |             |             |
|---|-------------|-------------|-------------|
| C | -4.24723300 | 1.74838100  | 0.00030900  |
| C | -4.75568800 | 0.46296500  | 0.00017000  |
| O | 5.18397800  | -2.28338900 | 0.00014900  |
| H | -2.53677800 | 3.05277600  | 0.00041300  |
| H | 4.41361500  | 0.12209600  | 0.00004900  |
| H | 0.72546100  | -3.16460200 | 0.00017100  |
| H | 3.04311700  | -3.92388300 | 0.00023200  |
| H | 3.99752000  | 2.01298500  | -0.00011500 |
| H | 3.48311400  | 4.39457700  | -0.00021300 |
| H | 1.10179600  | 5.16327700  | -0.00025500 |
| H | -0.70792800 | 3.52177000  | -0.00017300 |
| H | -5.26987800 | -2.31308000 | -0.00015000 |
| H | -3.51168500 | -4.04056200 | -0.00042900 |
| H | -1.13826700 | -3.48050800 | -0.00042700 |
| H | -4.93143100 | 2.59207100  | 0.00044600  |
| H | -5.82954800 | 0.29641600  | 0.00018900  |
| H | 5.25807900  | -3.24643700 | 0.00020400  |

**Optimized structure for 3a (anion, B3LYP/CPCM(DCM)/6-31+G(d,p))**

|   |             |             |             |
|---|-------------|-------------|-------------|
| C | -3.92334800 | -2.04316700 | 0.00000300  |
| C | -3.59607200 | -0.65398900 | 0.00000200  |
| C | -2.28240600 | -0.15775500 | 0.00000100  |
| C | -1.17933900 | -1.08634900 | 0.00000100  |
| C | -1.49512600 | -2.47629000 | 0.00000300  |
| C | -2.78838800 | -2.94045600 | 0.00000400  |
| C | -1.99389900 | 1.28214000  | 0.00000000  |
| C | -0.63845700 | 1.75342200  | -0.00000100 |
| C | 0.43246300  | 0.79477900  | 0.00000000  |
| C | 0.15668900  | -0.58510800 | 0.00000000  |
| C | -3.03298600 | 2.24441100  | -0.00000100 |
| C | -2.78052900 | 3.60709700  | -0.00000200 |
| C | -1.45098100 | 4.06744200  | -0.00000200 |
| C | -0.40999500 | 3.15583300  | -0.00000200 |
| C | 2.46696400  | -0.31790900 | -0.00000100 |
| C | 3.84563900  | -0.58540600 | -0.00000100 |
| C | 4.23101500  | -1.95720700 | -0.00000200 |
| C | 3.25895200  | -2.94262600 | -0.00000300 |
| C | 1.86714600  | -2.64039100 | -0.00000200 |

|   |             |             |             |
|---|-------------|-------------|-------------|
| C | 1.45473200  | -1.31540600 | -0.00000100 |
| C | 1.89643000  | 0.98849300  | 0.00000000  |
| C | 2.78062100  | 2.06026900  | 0.00000000  |
| C | 4.18580200  | 1.81669400  | 0.00000000  |
| C | 4.72173100  | 0.54183800  | -0.00000100 |
| O | -5.13164600 | -2.48029700 | 0.00000300  |
| H | -4.44198000 | 0.02502700  | 0.00000100  |
| H | -0.69285100 | -3.20209300 | 0.00000400  |
| H | -2.98650100 | -4.01015100 | 0.00000600  |
| H | -4.06527900 | 1.91541500  | -0.00000100 |
| H | -3.60674300 | 4.31227800  | -0.00000200 |
| H | -1.23826100 | 5.13292300  | -0.00000300 |
| H | 0.60439900  | 3.52918300  | -0.00000200 |
| H | 5.28436300  | -2.22499400 | -0.00000200 |
| H | 3.55823300  | -3.98693200 | -0.00000300 |
| H | 1.17355000  | -3.47168200 | -0.00000300 |
| H | 2.45266500  | 3.09247600  | 0.00000000  |
| H | 4.85327300  | 2.67414600  | 0.00000000  |
| H | 5.79834300  | 0.39462700  | -0.00000100 |

**Optimized structure for 3a (anion, B3LYP/6-31+G(d,p))**

|   |             |             |             |
|---|-------------|-------------|-------------|
| C | 3.92305900  | -2.05323600 | 0.00000600  |
| C | 3.58950000  | -0.65312900 | 0.00000700  |
| C | 2.28586600  | -0.15829800 | 0.00000200  |
| C | 1.17334700  | -1.08825100 | -0.00000200 |
| C | 1.48901800  | -2.48302500 | -0.00000400 |
| C | 2.77560800  | -2.95001700 | 0.00000000  |
| C | 1.99293900  | 1.28401900  | 0.00000000  |
| C | 0.63744600  | 1.75646400  | -0.00000200 |
| C | -0.43296300 | 0.80041200  | 0.00000000  |
| C | -0.15059500 | -0.58599200 | -0.00000300 |
| C | 3.03062700  | 2.24365700  | -0.00000200 |
| C | 2.78387200  | 3.60840000  | -0.00000600 |
| C | 1.45631400  | 4.07012400  | -0.00000900 |
| C | 0.41392300  | 3.15953000  | -0.00000700 |
| C | -2.46384800 | -0.31745500 | -0.00000100 |
| C | -3.84281400 | -0.58292300 | 0.00000100  |
| C | -4.22760400 | -1.95353400 | -0.00000400 |

|   |             |             |             |
|---|-------------|-------------|-------------|
| C | -3.25650300 | -2.94023500 | -0.00000800 |
| C | -1.86623800 | -2.63963400 | -0.00000800 |
| C | -1.45212300 | -1.31477300 | -0.00000500 |
| C | -1.88612100 | 0.99051800  | 0.00000300  |
| C | -2.77618500 | 2.06236900  | 0.00001100  |
| C | -4.17898900 | 1.81780600  | 0.00001300  |
| C | -4.71996600 | 0.54498400  | 0.00000700  |
| O | 5.11125500  | -2.48546100 | 0.00001000  |
| H | 4.44343600  | 0.01513700  | 0.00001100  |
| H | 0.68175600  | -3.20383000 | -0.00000800 |
| H | 2.98158100  | -4.01803500 | -0.00000100 |
| H | 4.06043000  | 1.90655900  | -0.00000100 |
| H | 3.61331900  | 4.31099600  | -0.00000700 |
| H | 1.24385500  | 5.13679600  | -0.00001300 |
| H | -0.60088000 | 3.53296300  | -0.00001200 |
| H | -5.28225000 | -2.22033400 | -0.00000300 |
| H | -3.55805900 | -3.98496400 | -0.00001100 |
| H | -1.16894500 | -3.46771400 | -0.00001100 |
| H | -2.44559200 | 3.09386800  | 0.00001800  |
| H | -4.84674400 | 2.67673900  | 0.00001900  |
| H | -5.79737400 | 0.39882400  | 0.00000800  |

**Optimized structure for 3b (neutral, B3LYP/CPCM(DCM)/6-31+G(d,p))**

|   |             |             |             |
|---|-------------|-------------|-------------|
| C | 4.56613000  | -1.06231900 | 0.24517900  |
| C | 3.93711500  | 0.16638000  | 0.13689100  |
| C | 2.53167500  | 0.26660500  | 0.01970100  |
| C | 1.75193100  | -0.93127600 | 0.02114700  |
| C | 2.43087800  | -2.16948700 | 0.14738800  |
| C | 3.80639600  | -2.24709000 | 0.25368500  |
| C | 1.86203900  | 1.55724100  | -0.11081300 |
| C | 0.42900900  | 1.63303900  | -0.12916900 |
| C | -0.34001300 | 0.40974200  | -0.03266700 |
| C | 0.31767900  | -0.83175500 | -0.05586900 |
| C | 2.60521000  | 2.75591100  | -0.24544600 |
| C | 1.99210900  | 3.98611000  | -0.40489600 |
| C | 0.58883400  | 4.05870100  | -0.44525200 |
| C | -0.16763600 | 2.90793700  | -0.31175300 |
| C | -1.95687900 | -1.25751300 | -0.08397900 |

|   |             |             |             |
|---|-------------|-------------|-------------|
| C | -3.17784100 | -1.95518900 | -0.10910800 |
| C | -3.12575100 | -3.36909900 | -0.23966700 |
| C | -1.89865500 | -4.00563600 | -0.32679500 |
| C | -0.67541400 | -3.28636200 | -0.27172400 |
| C | -0.69048800 | -1.90291900 | -0.13506300 |
| C | -1.80815500 | 0.15434500  | 0.01265200  |
| C | -2.99432300 | 0.88164000  | 0.18684300  |
| C | -4.25309600 | 0.19942700  | 0.15894400  |
| C | -4.35475100 | -1.16673300 | 0.00576100  |
| O | 5.93389300  | -1.07256400 | 0.35468900  |
| O | -2.94212300 | 2.22096100  | 0.40615000  |
| C | -4.14286900 | 2.97901600  | 0.60007100  |
| H | 4.56397200  | 1.04875100  | 0.15626800  |
| H | 1.86881100  | -3.09043000 | 0.19040300  |
| H | 4.29461500  | -3.21252700 | 0.35649900  |
| H | 3.68772900  | 2.72145800  | -0.24233300 |
| H | 2.59481500  | 4.88331500  | -0.51052000 |
| H | 0.09398400  | 5.01519600  | -0.58801000 |
| H | -1.24339700 | 2.97561200  | -0.34816000 |
| H | -4.04772200 | -3.94313100 | -0.27325800 |
| H | -1.86046300 | -5.08530700 | -0.43615700 |
| H | 0.24210000  | -3.85516400 | -0.35308300 |
| H | -5.16244100 | 0.77632900  | 0.26650700  |
| H | -5.33415600 | -1.63645200 | -0.01241100 |
| H | 6.25594700  | -1.98142500 | 0.43512800  |
| H | -3.81063000 | 4.00548000  | 0.75448200  |
| H | -4.78815200 | 2.93247100  | -0.28271900 |
| H | -4.68798000 | 2.63435800  | 1.48429000  |

**Optimized structure for 3b (neutral, B3LYP/6-31+G(d,p))**

|   |            |             |             |
|---|------------|-------------|-------------|
| C | 4.55877400 | -1.07033300 | 0.26064900  |
| C | 3.93432900 | 0.15802900  | 0.13768900  |
| C | 2.53064500 | 0.26202400  | 0.01674200  |
| C | 1.74738000 | -0.93311600 | 0.02647600  |
| C | 2.41969600 | -2.17122200 | 0.17304700  |
| C | 3.79456100 | -2.25105700 | 0.28444500  |
| C | 1.86484200 | 1.55275300  | -0.12275300 |
| C | 0.43283100 | 1.63297100  | -0.13886200 |

|   |             |             |             |
|---|-------------|-------------|-------------|
| C | -0.33801700 | 0.41239800  | -0.03827100 |
| C | 0.31523500  | -0.82919500 | -0.05895500 |
| C | 2.61084700  | 2.74739800  | -0.26596700 |
| C | 2.00168900  | 3.97772900  | -0.43061100 |
| C | 0.59943700  | 4.05425600  | -0.46740900 |
| C | -0.16019700 | 2.90771200  | -0.32597200 |
| C | -1.95999700 | -1.25195700 | -0.09063100 |
| C | -3.18080800 | -1.94784200 | -0.11628600 |
| C | -3.13008700 | -3.36130400 | -0.25507900 |
| C | -1.90530800 | -3.99709900 | -0.35047300 |
| C | -0.68148900 | -3.27839400 | -0.29259800 |
| C | -0.69458000 | -1.89813100 | -0.14401100 |
| C | -1.80724800 | 0.15909500  | 0.00870200  |
| C | -2.99055700 | 0.88527500  | 0.18738400  |
| C | -4.24974200 | 0.20623100  | 0.16342200  |
| C | -4.35496900 | -1.15923200 | 0.00564200  |
| O | 5.92705900  | -1.08285000 | 0.37179200  |
| O | -2.93716100 | 2.22970500  | 0.40338800  |
| C | -4.12548800 | 2.97080900  | 0.66680900  |
| H | 4.56642500  | 1.03634700  | 0.15081900  |
| H | 1.85026300  | -3.08699600 | 0.23344500  |
| H | 4.27871800  | -3.21773900 | 0.40540100  |
| H | 3.69318500  | 2.70749800  | -0.26617400 |
| H | 2.60688800  | 4.87255600  | -0.54338000 |
| H | 0.10759800  | 5.01176000  | -0.61507600 |
| H | -1.23529000 | 2.97756400  | -0.36175100 |
| H | -4.05288000 | -3.93436300 | -0.28985200 |
| H | -1.86854800 | -5.07606600 | -0.46903000 |
| H | 0.23746800  | -3.84371900 | -0.38476700 |
| H | -5.15825600 | 0.78450200  | 0.27394100  |
| H | -5.33539300 | -1.62759800 | -0.01190700 |
| H | 6.24135400  | -1.99140600 | 0.46434800  |
| H | -3.79370300 | 3.99486700  | 0.84290100  |
| H | -4.80952800 | 2.95382300  | -0.18967700 |
| H | -4.63816000 | 2.59735000  | 1.56055100  |

**Optimized structure for 3b (anion, B3LYP/CPCM(DCM)/6-31+G(d,p))**

|   |            |             |            |
|---|------------|-------------|------------|
| C | 4.66075900 | -1.13866800 | 0.27034100 |
|---|------------|-------------|------------|

|   |             |             |             |
|---|-------------|-------------|-------------|
| C | 3.97486400  | 0.10656100  | 0.15873700  |
| C | 2.57941100  | 0.22474000  | 0.03343400  |
| C | 1.76864400  | -0.96186800 | 0.02528400  |
| C | 2.44177200  | -2.21144600 | 0.15016900  |
| C | 3.80905100  | -2.30688900 | 0.26438300  |
| C | 1.91447300  | 1.52438100  | -0.10801600 |
| C | 0.48048000  | 1.62126300  | -0.13101800 |
| C | -0.30609500 | 0.41182400  | -0.03167300 |
| C | 0.34527600  | -0.83886000 | -0.05161300 |
| C | 2.67013100  | 2.71442900  | -0.24961900 |
| C | 2.07758400  | 3.95488100  | -0.41766000 |
| C | 0.67509000  | 4.04698700  | -0.46108500 |
| C | -0.09602300 | 2.90580900  | -0.32376300 |
| C | -1.94244800 | -1.23976600 | -0.08594100 |
| C | -3.17218800 | -1.92248200 | -0.11420800 |
| C | -3.13495100 | -3.33755900 | -0.24821900 |
| C | -1.91533700 | -3.98715900 | -0.33463400 |
| C | -0.68300400 | -3.28140800 | -0.27526500 |
| C | -0.68206300 | -1.89905700 | -0.13524300 |
| C | -1.77411800 | 0.17212800  | 0.01276000  |
| C | -2.95347300 | 0.90848700  | 0.18984900  |
| C | -4.22007100 | 0.24302900  | 0.15830900  |
| C | -4.34167200 | -1.12205400 | 0.00038400  |
| O | 5.93966200  | -1.23242400 | 0.38088200  |
| O | -2.88416600 | 2.25238300  | 0.41882800  |
| C | -4.07599500 | 3.01795900  | 0.61292500  |
| H | 4.60262300  | 0.99092500  | 0.18376600  |
| H | 1.86440600  | -3.12536800 | 0.18783600  |
| H | 4.28193300  | -3.28115600 | 0.36960500  |
| H | 3.75204700  | 2.65979300  | -0.24442400 |
| H | 2.69452800  | 4.84229400  | -0.52847400 |
| H | 0.19237100  | 5.00924700  | -0.61076400 |
| H | -1.17123500 | 2.98771400  | -0.36414700 |
| H | -4.06355800 | -3.90123200 | -0.28456800 |
| H | -1.88904300 | -5.06729300 | -0.44625700 |
| H | 0.22952400  | -3.85826200 | -0.35436300 |
| H | -5.12219100 | 0.83164400  | 0.26695200  |
| H | -5.32671900 | -1.57985900 | -0.02134300 |

|   |             |            |             |
|---|-------------|------------|-------------|
| H | -3.73752100 | 4.04167500 | 0.77498400  |
| H | -4.72159700 | 2.98406600 | -0.27115900 |
| H | -4.63010200 | 2.67457000 | 1.49297300  |

**Optimized structure for 3b (anion, B3LYP/6-31+G(d,p))**

|   |             |             |             |
|---|-------------|-------------|-------------|
| C | 4.65285000  | -1.15498000 | 0.30909500  |
| C | 3.96278700  | 0.10078700  | 0.18301100  |
| C | 2.57989800  | 0.22276600  | 0.03990400  |
| C | 1.75804700  | -0.96630800 | 0.02802400  |
| C | 2.42603500  | -2.22208000 | 0.17206900  |
| C | 3.78560900  | -2.32444900 | 0.30291600  |
| C | 1.91437600  | 1.52296600  | -0.12407000 |
| C | 0.48106600  | 1.62552900  | -0.15378700 |
| C | -0.30802000 | 0.42080000  | -0.04613200 |
| C | 0.34843000  | -0.83515500 | -0.06284500 |
| C | 2.67436100  | 2.70543400  | -0.28203600 |
| C | 2.09072800  | 3.94785900  | -0.46899800 |
| C | 0.68961800  | 4.04550600  | -0.51729500 |
| C | -0.08724700 | 2.90995000  | -0.36749800 |
| C | -1.94370900 | -1.23380800 | -0.09693600 |
| C | -3.17583400 | -1.91166600 | -0.12609900 |
| C | -3.13943300 | -3.32615000 | -0.27366100 |
| C | -1.92206500 | -3.97539200 | -0.37417700 |
| C | -0.68793000 | -3.27286000 | -0.31304300 |
| C | -0.68455000 | -1.89387700 | -0.15356300 |
| C | -1.76436000 | 0.18092000  | 0.00640000  |
| C | -2.94603100 | 0.91226400  | 0.19544700  |
| C | -4.21084200 | 0.25434500  | 0.16734500  |
| C | -4.34378800 | -1.11155100 | -0.00082400 |
| O | 5.90876900  | -1.25241200 | 0.43066500  |
| O | -2.87062500 | 2.26705800  | 0.43122900  |
| C | -4.04054000 | 3.00006700  | 0.73963900  |
| H | 4.60263600  | 0.97568100  | 0.21480900  |
| H | 1.83777900  | -3.12931000 | 0.21969100  |
| H | 4.26164200  | -3.29464800 | 0.42745800  |
| H | 3.75568300  | 2.63800300  | -0.27560000 |
| H | 2.71414300  | 4.83003800  | -0.59286400 |
| H | 0.21046700  | 5.00802400  | -0.68418900 |



|   |             |             |             |
|---|-------------|-------------|-------------|
| H | -1.16154800 | 2.99599000  | -0.41765900 |
| H | -4.06997200 | -3.88843400 | -0.31071600 |
| H | -1.89868900 | -5.05514100 | -0.49934900 |
| H | 0.22687600  | -3.84353400 | -0.40838400 |
| H | -5.11090000 | 0.84677800  | 0.28345900  |
| H | -5.33105600 | -1.56597000 | -0.02245300 |
| H | -3.70428600 | 4.01967100  | 0.94029100  |
| H | -4.75046800 | 3.01569000  | -0.09896900 |
| H | -4.54419800 | 2.60449100  | 1.63200300  |

**Optimized structure for 3c (neutral, B3LYP/CPCM(DCM)/6-31+G(d,p))**

|   |             |             |             |
|---|-------------|-------------|-------------|
| C | 4.32923500  | -1.40999600 | 0.31195100  |
| C | 3.81333600  | -0.12882700 | 0.20048200  |
| C | 2.42889800  | 0.09319000  | 0.03471600  |
| C | 1.54929300  | -1.03696700 | -0.00039800 |
| C | 2.11382800  | -2.33218300 | 0.12109200  |
| C | 3.47212600  | -2.52755200 | 0.27065000  |
| C | 1.88162100  | 1.43630300  | -0.13143800 |
| C | 0.46371600  | 1.62934300  | -0.20428400 |
| C | -0.40026800 | 0.48306000  | -0.06619600 |
| C | 0.13470200  | -0.81125800 | -0.09234900 |
| C | 2.72249500  | 2.56715600  | -0.27179400 |
| C | 2.21224100  | 3.83159700  | -0.51008100 |
| C | 0.82361200  | 4.00805700  | -0.64711500 |
| C | -0.02472700 | 2.92554100  | -0.50200700 |
| C | -2.17387200 | -1.01659900 | -0.10954600 |
| C | -3.46143100 | -1.57400900 | -0.11791800 |
| C | -3.55560400 | -2.98716300 | -0.27725900 |
| C | -2.40212300 | -3.74021200 | -0.38721400 |
| C | -1.10458000 | -3.15446800 | -0.32981700 |
| C | -0.98076600 | -1.78292600 | -0.17969600 |
| C | -1.87809800 | 0.37152200  | 0.02362300  |
| C | -2.97350700 | 1.20475000  | 0.28631300  |
| C | -4.30445900 | 0.65908700  | 0.27390900  |
| C | -4.55333400 | -0.67670500 | 0.05656500  |
| O | 5.68255400  | -1.53807600 | 0.46939300  |
| C | -2.90465700 | 2.57937900  | 0.68497800  |
| N | -2.95252600 | 3.68111400  | 1.06150300  |

|   |             |             |             |
|---|-------------|-------------|-------------|
| H | 4.51271100  | 0.69595100  | 0.25123300  |
| H | 1.47267700  | -3.20139200 | 0.12501600  |
| H | 3.87470200  | -3.53201200 | 0.36927600  |
| H | 3.79791700  | 2.45024000  | -0.21801400 |
| H | 2.88597100  | 4.67600100  | -0.61884700 |
| H | 0.41562100  | 4.98669100  | -0.88125300 |
| H | -1.08304000 | 3.07481800  | -0.65260000 |
| H | -4.53094900 | -3.46377700 | -0.30802000 |
| H | -2.47592100 | -4.81619600 | -0.51177100 |
| H | -0.25127900 | -3.81496800 | -0.41569100 |
| H | -5.12953200 | 1.33892000  | 0.45695200  |
| H | -5.57400500 | -1.04660300 | 0.05001100  |
| H | 5.92631800  | -2.47158100 | 0.54504200  |

**Optimized structure for 3c (neutral, B3LYP/6-31+G(d,p))**

|   |             |             |             |
|---|-------------|-------------|-------------|
| C | 4.33678800  | -1.39641800 | 0.29799600  |
| C | 3.81761400  | -0.11866700 | 0.17915400  |
| C | 2.43187600  | 0.10067100  | 0.02589000  |
| C | 1.55401000  | -1.03015300 | 0.00688800  |
| C | 2.11983800  | -2.32199500 | 0.14345400  |
| C | 3.47998600  | -2.51357100 | 0.28241400  |
| C | 1.87972700  | 1.44148900  | -0.13434400 |
| C | 0.46084400  | 1.63374000  | -0.18845000 |
| C | -0.40083800 | 0.48417700  | -0.05678400 |
| C | 0.13922600  | -0.80710300 | -0.08409800 |
| C | 2.71768700  | 2.57287800  | -0.27772900 |
| C | 2.20439200  | 3.83936000  | -0.49192600 |
| C | 0.81457500  | 4.01807900  | -0.59758500 |
| C | -0.03100300 | 2.93418800  | -0.45562500 |
| C | -2.16729400 | -1.02720400 | -0.09762400 |
| C | -3.44936900 | -1.59579600 | -0.10887000 |
| C | -3.53265100 | -3.00800700 | -0.27354200 |
| C | -2.37464100 | -3.75151400 | -0.39297300 |
| C | -1.08327300 | -3.15504200 | -0.33676000 |
| C | -0.96910000 | -1.78444700 | -0.17305200 |
| C | -1.88115700 | 0.36431900  | 0.03123900  |
| C | -2.98358000 | 1.19135200  | 0.28047300  |
| C | -4.30881600 | 0.63112600  | 0.27151200  |

|   |             |             |             |
|---|-------------|-------------|-------------|
| C | -4.54779800 | -0.70679800 | 0.06372700  |
| O | 5.69323500  | -1.52001400 | 0.44072800  |
| C | -2.94195900 | 2.57863300  | 0.64063600  |
| N | -3.02515000 | 3.69168600  | 0.97362800  |
| H | 4.51813900  | 0.70529600  | 0.21800000  |
| H | 1.47651200  | -3.18940200 | 0.17359500  |
| H | 3.88332500  | -3.51732900 | 0.39533400  |
| H | 3.79370100  | 2.45378200  | -0.24265500 |
| H | 2.87660100  | 4.68520500  | -0.60071100 |
| H | 0.39976200  | 5.00071600  | -0.80024700 |
| H | -1.09136100 | 3.09163700  | -0.57338400 |
| H | -4.50464300 | -3.49221900 | -0.30410700 |
| H | -2.44139600 | -4.82727100 | -0.52621900 |
| H | -0.22278300 | -3.80436900 | -0.43854500 |
| H | -5.13768300 | 1.30846100  | 0.44772100  |
| H | -5.56595700 | -1.08481700 | 0.05858400  |
| H | 5.93545500  | -2.45116800 | 0.52729300  |

**Optimized structure for 3c (anion, B3LYP/CPCM(DCM)/6-31+G(d,p))**

|   |             |             |             |
|---|-------------|-------------|-------------|
| C | 4.39943900  | -1.51965600 | 0.34659300  |
| C | 3.83667600  | -0.20940700 | 0.22978700  |
| C | 2.47188700  | 0.03739100  | 0.04885000  |
| C | 1.55358200  | -1.07683700 | -0.00261400 |
| C | 2.10473700  | -2.38962500 | 0.11523900  |
| C | 3.44799900  | -2.61102000 | 0.27801500  |
| C | 1.93781000  | 1.39361500  | -0.12975600 |
| C | 0.52314700  | 1.61567600  | -0.20140800 |
| C | -0.36665900 | 0.48850100  | -0.06527900 |
| C | 0.16043200  | -0.82276400 | -0.09358300 |
| C | 2.79888500  | 2.50637600  | -0.28227800 |
| C | 2.31893500  | 3.78389600  | -0.52434500 |
| C | 0.93403400  | 3.98948900  | -0.65291400 |
| C | 0.06424000  | 2.92332800  | -0.50115200 |
| C | -2.15560000 | -0.99052800 | -0.10271100 |
| C | -3.45241500 | -1.52327200 | -0.11606100 |
| C | -3.57117400 | -2.93258000 | -0.27840300 |
| C | -2.43122100 | -3.70833200 | -0.39294800 |
| C | -1.12520500 | -3.14657700 | -0.33754700 |

|   |             |             |             |
|---|-------------|-------------|-------------|
| C | -0.97744700 | -1.77656900 | -0.17975200 |
| C | -1.82858000 | 0.39948900  | 0.02811900  |
| C | -2.91865800 | 1.25113500  | 0.28509800  |
| C | -4.26073300 | 0.72352000  | 0.26660800  |
| C | -4.53456300 | -0.60513500 | 0.05236700  |
| O | 5.65155700  | -1.72799100 | 0.50715800  |
| C | -2.83192600 | 2.61930400  | 0.68835800  |
| N | -2.86452300 | 3.72198700  | 1.06943700  |
| H | 4.54391400  | 0.61062100  | 0.29106300  |
| H | 1.44251100  | -3.24489100 | 0.10699900  |
| H | 3.83086900  | -3.62400600 | 0.37785800  |
| H | 3.87146300  | 2.36069400  | -0.23451100 |
| H | 3.01215500  | 4.61175400  | -0.64172300 |
| H | 0.54390800  | 4.97593000  | -0.88732800 |
| H | -0.99211000 | 3.09511100  | -0.64577600 |
| H | -4.55538300 | -3.39154900 | -0.30975000 |
| H | -2.52617500 | -4.78248900 | -0.52182500 |
| H | -0.28193300 | -3.81860700 | -0.43156800 |
| H | -5.07460700 | 1.41948400  | 0.44259200  |
| H | -5.56112900 | -0.95854000 | 0.04095600  |

**Optimized structure for 3c (anion, B3LYP/6-31+G(d,p))**

|   |             |             |             |
|---|-------------|-------------|-------------|
| C | 4.42005000  | -1.49155300 | 0.32605100  |
| C | 3.83991500  | -0.17651800 | 0.20539900  |
| C | 2.48034400  | 0.06093300  | 0.04277600  |
| C | 1.56191400  | -1.06223200 | 0.01011600  |
| C | 2.12234700  | -2.37548000 | 0.14266100  |
| C | 3.46291900  | -2.59142200 | 0.28945800  |
| C | 1.92855400  | 1.41405800  | -0.13063200 |
| C | 0.51209800  | 1.62902100  | -0.17720800 |
| C | -0.37260800 | 0.49438300  | -0.05064600 |
| C | 0.17741900  | -0.81734200 | -0.08051300 |
| C | 2.78117800  | 2.52908500  | -0.29203600 |
| C | 2.29433100  | 3.80955200  | -0.50505100 |
| C | 0.90754900  | 4.01301800  | -0.58861100 |
| C | 0.04484600  | 2.94107900  | -0.43667900 |
| C | -2.13529600 | -1.01454000 | -0.08177100 |
| C | -3.42361900 | -1.56704600 | -0.10576000 |

|   |             |             |             |
|---|-------------|-------------|-------------|
| C | -3.52107400 | -2.97470100 | -0.27391300 |
| C | -2.37065500 | -3.73594900 | -0.39761700 |
| C | -1.07660200 | -3.15591700 | -0.34294000 |
| C | -0.94862200 | -1.78430600 | -0.16600000 |
| C | -1.82209300 | 0.38720200  | 0.04035700  |
| C | -2.93619000 | 1.22701300  | 0.27209200  |
| C | -4.26583600 | 0.66937900  | 0.24935900  |
| C | -4.52287300 | -0.66360000 | 0.05014100  |
| O | 5.65728800  | -1.68989600 | 0.46367600  |
| C | -2.90428100 | 2.60845600  | 0.63255100  |
| N | -3.00708300 | 3.72381700  | 0.96430400  |
| H | 4.55155100  | 0.63992500  | 0.25392100  |
| H | 1.45760000  | -3.22888400 | 0.16651100  |
| H | 3.85974200  | -3.59710100 | 0.40494700  |
| H | 3.85430600  | 2.38028600  | -0.26996300 |
| H | 2.98415100  | 4.64069100  | -0.62673500 |
| H | 0.50403800  | 5.00335300  | -0.78279800 |
| H | -1.01496900 | 3.11874800  | -0.53631000 |
| H | -4.50018100 | -3.44673800 | -0.30785700 |
| H | -2.45251100 | -4.81085600 | -0.53748200 |
| H | -0.21971100 | -3.80724200 | -0.45771900 |
| H | -5.09045700 | 1.35773200  | 0.40936300  |
| H | -5.54456900 | -1.03289900 | 0.03510300  |

**Input geometry for NICS(1) calculation of 2a (neutral)**

|   |             |             |             |
|---|-------------|-------------|-------------|
| C | 3.93450000  | -2.67790000 | 0.22490000  |
| C | 3.81670000  | -1.30290000 | 0.13160000  |
| C | 2.55600000  | -0.66300000 | 0.04280000  |
| C | 1.38240000  | -1.47740000 | 0.04920000  |
| C | 1.53280000  | -2.88340000 | 0.16360000  |
| C | 2.77800000  | -3.47720000 | 0.24650000  |
| C | 2.42880000  | 0.78660000  | -0.05240000 |
| C | 1.13390000  | 1.40290000  | -0.04750000 |
| C | -0.03770000 | 0.55860000  | 0.02320000  |
| C | 0.09440000  | -0.83750000 | -0.01640000 |
| C | 3.56960000  | 1.61810000  | -0.16450000 |
| C | 3.46770000  | 2.99270000  | -0.27380000 |
| C | 2.19820000  | 3.59450000  | -0.28220000 |

|    |             |             |             |
|----|-------------|-------------|-------------|
| C  | 1.06260000  | 2.81380000  | -0.17310000 |
| C  | -2.17210000 | -0.36670000 | -0.03640000 |
| C  | -3.56570000 | -0.54600000 | -0.06410000 |
| C  | -4.05610000 | -1.87130000 | -0.20780000 |
| C  | -3.16420000 | -2.92420000 | -0.30980000 |
| C  | -1.75990000 | -2.72450000 | -0.25590000 |
| C  | -1.24680000 | -1.44270000 | -0.10070000 |
| C  | -1.49210000 | 0.88220000  | 0.06850000  |
| C  | -2.31440000 | 1.99540000  | 0.23060000  |
| C  | -3.73620000 | 1.84750000  | 0.20880000  |
| C  | -4.35720000 | 0.62940000  | 0.05830000  |
| H  | 4.91770000  | -3.13380000 | 0.29490000  |
| O  | -1.81070000 | 3.25000000  | 0.43440000  |
| H  | 4.72340000  | -0.71060000 | 0.14050000  |
| H  | 0.65560000  | -3.51090000 | 0.21920000  |
| H  | 2.85890000  | -4.55630000 | 0.34080000  |
| H  | 4.55790000  | 1.17560000  | -0.18050000 |
| H  | 4.36540000  | 3.59770000  | -0.36210000 |
| H  | 2.10360000  | 4.67220000  | -0.38060000 |
| H  | 0.09570000  | 3.28970000  | -0.18770000 |
| H  | -5.12740000 | -2.05080000 | -0.24180000 |
| H  | -3.54010000 | -3.93570000 | -0.43210000 |
| H  | -1.12500000 | -3.59550000 | -0.35530000 |
| H  | -4.34020000 | 2.74620000  | 0.32060000  |
| H  | -5.44170000 | 0.56730000  | 0.04360000  |
| H  | -2.53550000 | 3.88280000  | 0.52570000  |
| Bq | 2.66670000  | -2.08030000 | 0.14310000  |
| Bq | 2.63090000  | -2.01250000 | 1.14020000  |
| Bq | 2.70260000  | -2.14810000 | -0.85400000 |
| Bq | 1.25960000  | -0.03830000 | -0.00020000 |
| Bq | 2.31010000  | 2.20140000  | -0.16560000 |
| Bq | -0.97090000 | -0.24120000 | -0.01240000 |
| Bq | -2.66080000 | -1.64590000 | -0.16250000 |
| Bq | -2.93960000 | 0.74030000  | 0.07760000  |
| Bq | 1.27990000  | -0.00370000 | 0.99900000  |
| Bq | 1.23940000  | -0.07290000 | -0.99940000 |
| Bq | 2.34650000  | 2.28770000  | 0.83000000  |
| Bq | 2.27380000  | 2.11520000  | -1.16120000 |

|    |             |             |             |
|----|-------------|-------------|-------------|
| Bq | -0.95900000 | -0.16400000 | -1.00930000 |
| Bq | -0.98270000 | -0.31850000 | 0.98460000  |
| Bq | -2.64490000 | -1.54390000 | -1.15710000 |
| Bq | -2.67670000 | -1.74790000 | 0.83220000  |
| Bq | -2.93550000 | 0.86090000  | -0.91510000 |
| Bq | -2.94370000 | 0.61970000  | 1.07030000  |

**Input geometry for NICS(1) calculation of 2a (anion)**

|   |             |             |            |
|---|-------------|-------------|------------|
| C | 3.93790000  | -2.68350000 | 0.00000000 |
| C | 3.80560000  | -1.30370000 | 0.00000000 |
| C | 2.54390000  | -0.66330000 | 0.00000000 |
| C | 1.36370000  | -1.47700000 | 0.00000000 |
| C | 1.53240000  | -2.88880000 | 0.00000000 |
| C | 2.78150000  | -3.48350000 | 0.00000000 |
| C | 2.41520000  | 0.79290000  | 0.00000000 |
| C | 1.11880000  | 1.40450000  | 0.00000000 |
| C | -0.06510000 | 0.56880000  | 0.00000000 |
| C | 0.07190000  | -0.84650000 | 0.00000000 |
| C | 3.55360000  | 1.63590000  | 0.00000000 |
| C | 3.44550000  | 3.01680000  | 0.00000000 |
| C | 2.17220000  | 3.61210000  | 0.00000000 |
| C | 1.03550000  | 2.82140000  | 0.00000000 |
| C | -2.17570000 | -0.33090000 | 0.00000000 |
| C | -3.57640000 | -0.50660000 | 0.00000000 |
| C | -4.08110000 | -1.81840000 | 0.00000000 |
| C | -3.20290000 | -2.90690000 | 0.00000000 |
| C | -1.80650000 | -2.72460000 | 0.00000000 |
| C | -1.26430000 | -1.43240000 | 0.00000000 |
| C | -1.48730000 | 0.91050000  | 0.00000000 |
| C | -2.27630000 | 2.12650000  | 0.00000000 |
| C | -3.74290000 | 1.91590000  | 0.00000000 |
| C | -4.35950000 | 0.70080000  | 0.00000000 |
| O | -1.86120000 | 3.31830000  | 0.00000000 |
| H | 4.92570000  | -3.13720000 | 0.00000000 |
| H | 4.70990000  | -0.70570000 | 0.00000000 |
| H | 0.65840000  | -3.52330000 | 0.00000000 |
| H | 2.86340000  | -4.56810000 | 0.00000000 |
| H | 4.54680000  | 1.20090000  | 0.00000000 |

|    |             |             |             |
|----|-------------|-------------|-------------|
| H  | 4.34400000  | 3.63000000  | 0.00000000  |
| H  | 2.07280000  | 4.69510000  | 0.00000000  |
| H  | 0.04480000  | 3.26990000  | 0.00000000  |
| H  | -5.15720000 | -1.98400000 | 0.00000000  |
| H  | -3.60120000 | -3.91890000 | 0.00000000  |
| H  | -1.18560000 | -3.61300000 | 0.00000000  |
| H  | -4.32310000 | 2.83560000  | 0.00000000  |
| H  | -5.44740000 | 0.63230000  | 0.00000000  |
| Bq | 2.66080000  | -2.08330000 | 0.00000000  |
| Bq | 1.24140000  | -0.03680000 | 0.00000000  |
| Bq | 2.29010000  | 2.21390000  | 0.00000000  |
| Bq | -0.98410000 | -0.22610000 | 0.00000000  |
| Bq | -2.68450000 | -1.62000000 | 0.00000000  |
| Bq | -2.93640000 | 0.80270000  | 0.00000000  |
| Bq | 2.66080000  | -2.08330000 | -1.00000000 |
| Bq | 2.66080000  | -2.08330000 | -1.00000000 |
| Bq | 2.66080000  | -2.08330000 | 1.00000000  |
| Bq | 1.24140000  | -0.03680000 | -1.00000000 |
| Bq | 1.24140000  | -0.03680000 | 1.00000000  |
| Bq | 2.29010000  | 2.21390000  | -1.00000000 |
| Bq | 2.29010000  | 2.21390000  | 1.00000000  |
| Bq | -0.98410000 | -0.22610000 | -1.00000000 |
| Bq | -0.98410000 | -0.22610000 | 1.00000000  |
| Bq | -2.68450000 | -1.62000000 | -1.00000000 |
| Bq | -2.68450000 | -1.62000000 | 1.00000000  |
| Bq | -2.93640000 | 0.80270000  | -1.00000000 |
| Bq | -2.93640000 | 0.80270000  | 1.00000000  |

**Input geometry for NICS(1) calculation of 2b (neutral)**

|   |             |             |             |
|---|-------------|-------------|-------------|
| C | 4.09590000  | -0.81730000 | 0.10110000  |
| C | 3.45110000  | 0.41060000  | 0.03840000  |
| C | 2.04700000  | 0.51240000  | -0.02090000 |
| C | 1.27040000  | -0.68870000 | -0.01630000 |
| C | 1.95650000  | -1.92190000 | 0.06680000  |
| C | 3.33770000  | -2.00360000 | 0.12190000  |
| C | 1.37030000  | 1.80490000  | -0.08790000 |
| C | -0.06120000 | 1.87620000  | -0.05830000 |
| C | -0.82110000 | 0.64680000  | 0.01270000  |



|    |             |             |             |
|----|-------------|-------------|-------------|
| C  | -0.16510000 | -0.59070000 | -0.05020000 |
| C  | 2.10440000  | 3.00970000  | -0.19740000 |
| C  | 1.48300000  | 4.24260000  | -0.28130000 |
| C  | 0.08040000  | 4.31150000  | -0.26550000 |
| C  | -0.66830000 | 3.15370000  | -0.15830000 |
| C  | -2.43930000 | -1.02550000 | -0.03110000 |
| C  | -3.65750000 | -1.72580000 | -0.04150000 |
| C  | -3.60390000 | -3.13690000 | -0.19450000 |
| C  | -2.37820000 | -3.76640000 | -0.32170000 |
| C  | -1.15750000 | -3.04300000 | -0.28590000 |
| C  | -1.17320000 | -1.66350000 | -0.12320000 |
| C  | -2.28750000 | 0.38810000  | 0.08070000  |
| C  | -3.47120000 | 1.09890000  | 0.26730000  |
| C  | -4.72800000 | 0.41680000  | 0.26280000  |
| C  | -4.83760000 | -0.94520000 | 0.10640000  |
| O  | -3.48430000 | 2.45030000  | 0.47890000  |
| O  | 5.46350000  | -0.77670000 | 0.15270000  |
| C  | 6.18020000  | -2.00220000 | 0.22920000  |
| H  | 4.08080000  | 1.29080000  | 0.04900000  |
| H  | 1.39600000  | -2.84360000 | 0.11950000  |
| H  | 3.81140000  | -2.97530000 | 0.19330000  |
| H  | 3.18650000  | 2.97800000  | -0.23100000 |
| H  | 2.07940000  | 5.14620000  | -0.36820000 |
| H  | -0.42180000 | 5.27170000  | -0.34350000 |
| H  | -1.74390000 | 3.22350000  | -0.15380000 |
| H  | -4.52470000 | -3.71380000 | -0.21540000 |
| H  | -2.33960000 | -4.84410000 | -0.45050000 |
| H  | -0.23860000 | -3.60310000 | -0.40430000 |
| H  | -5.62830000 | 1.01480000  | 0.39350000  |
| H  | -5.81540000 | -1.41860000 | 0.10580000  |
| H  | -4.39500000 | 2.75540000  | 0.58580000  |
| H  | 7.23550000  | -1.72730000 | 0.25460000  |
| H  | 5.92910000  | -2.55860000 | 1.14110000  |
| H  | 5.99150000  | -2.63360000 | -0.64830000 |
| Bq | 2.69310000  | -0.75140000 | 0.04850000  |
| Bq | 0.60670000  | 0.59350000  | -0.03680000 |
| Bq | 0.71810000  | 3.06640000  | -0.17480000 |
| Bq | -1.37720000 | -0.44900000 | -0.02220000 |

|    |             |             |             |
|----|-------------|-------------|-------------|
| Bq | -3.57020000 | -0.29880000 | 0.10740000  |
| Bq | -2.40160000 | -2.39350000 | -0.16630000 |
| Bq | 2.73720000  | -0.78370000 | -0.95000000 |
| Bq | 2.64900000  | -0.71910000 | 1.04700000  |
| Bq | 0.57080000  | 0.55800000  | -1.03550000 |
| Bq | 0.64270000  | 0.62890000  | 0.96190000  |
| Bq | 0.70110000  | 2.98510000  | -1.17130000 |
| Bq | 0.73510000  | 3.14770000  | 0.82180000  |
| Bq | -1.43410000 | -0.38830000 | -1.01880000 |
| Bq | -1.32030000 | -0.50960000 | 0.97430000  |
| Bq | -2.44890000 | -2.29660000 | -1.16050000 |
| Bq | -2.35430000 | -2.49050000 | 0.82780000  |
| Bq | -3.62990000 | -0.18020000 | -0.88370000 |
| Bq | -3.51050000 | -0.41740000 | 1.09860000  |

**Input geometry for NICS(1) calculation of 2b (anion)**

|   |             |             |            |
|---|-------------|-------------|------------|
| C | 4.08950000  | -0.81540000 | 0.00000000 |
| C | 3.43790000  | 0.40870000  | 0.00000000 |
| C | 2.03070000  | 0.50950000  | 0.00000000 |
| C | 1.25090000  | -0.69360000 | 0.00000000 |
| C | 1.95210000  | -1.92300000 | 0.00000000 |
| C | 3.33810000  | -2.00220000 | 0.00000000 |
| C | 1.35220000  | 1.80530000  | 0.00000000 |
| C | -0.07980000 | 1.87100000  | 0.00000000 |
| C | -0.85400000 | 0.64560000  | 0.00000000 |
| C | -0.18640000 | -0.60700000 | 0.00000000 |
| C | 2.08100000  | 3.01910000  | 0.00000000 |
| C | 1.45180000  | 4.25330000  | 0.00000000 |
| C | 0.04750000  | 4.31380000  | 0.00000000 |
| C | -0.69960000 | 3.14780000  | 0.00000000 |
| C | -2.45950000 | -0.99340000 | 0.00000000 |
| C | -3.68490000 | -1.69450000 | 0.00000000 |
| C | -3.64580000 | -3.09950000 | 0.00000000 |
| C | -2.41630000 | -3.76700000 | 0.00000000 |
| C | -1.19740000 | -3.06160000 | 0.00000000 |
| C | -1.19410000 | -1.66040000 | 0.00000000 |
| C | -2.30060000 | 0.41610000  | 0.00000000 |
| C | -3.49480000 | 1.23610000  | 0.00000000 |

|    |             |             |             |
|----|-------------|-------------|-------------|
| C  | -4.76830000 | 0.47830000  | 0.00000000  |
| C  | -4.87180000 | -0.88060000 | 0.00000000  |
| O  | -3.56860000 | 2.49640000  | 0.00000000  |
| O  | 5.47430000  | -0.77040000 | 0.00000000  |
| C  | 6.17720000  | -1.99710000 | 0.00000000  |
| H  | 4.06260000  | 1.29350000  | 0.00000000  |
| H  | 1.39600000  | -2.84910000 | 0.00000000  |
| H  | 3.81380000  | -2.97660000 | 0.00000000  |
| H  | 3.16500000  | 2.99670000  | 0.00000000  |
| H  | 2.04620000  | 5.16420000  | 0.00000000  |
| H  | -0.45990000 | 5.27580000  | 0.00000000  |
| H  | -1.78680000 | 3.18190000  | 0.00000000  |
| H  | -4.57540000 | -3.66650000 | 0.00000000  |
| H  | -2.39530000 | -4.85440000 | 0.00000000  |
| H  | -0.28210000 | -3.64280000 | 0.00000000  |
| H  | -5.65720000 | 1.10480000  | 0.00000000  |
| H  | -5.85010000 | -1.36130000 | 0.00000000  |
| H  | 7.23840000  | -1.73780000 | 0.00000000  |
| H  | 5.95340000  | -2.59610000 | 0.89410000  |
| H  | 5.95340000  | -2.59610000 | -0.89410000 |
| Bq | 2.68320000  | -0.75270000 | 0.00000000  |
| Bq | 0.58560000  | 0.58850000  | 0.00000000  |
| Bq | 0.69220000  | 3.06840000  | 0.00000000  |
| Bq | -1.39890000 | -0.43980000 | 0.00000000  |
| Bq | -2.43300000 | -2.37940000 | 0.00000000  |
| Bq | -3.59660000 | -0.23970000 | 0.00000000  |
| Bq | 2.68320000  | -0.75270000 | 1.00000000  |
| Bq | 2.68320000  | -0.75270000 | -1.00000000 |
| Bq | 0.58560000  | 0.58850000  | -1.00000000 |
| Bq | 0.58560000  | 0.58850000  | 1.00000000  |
| Bq | 0.69220000  | 3.06840000  | -1.00000000 |
| Bq | 0.69220000  | 3.06840000  | 1.00000000  |
| Bq | -1.39890000 | -0.43980000 | -1.00000000 |
| Bq | -1.39890000 | -0.43980000 | 1.00000000  |
| Bq | -2.43300000 | -2.37940000 | -1.00000000 |
| Bq | -2.43300000 | -2.37940000 | 1.00000000  |
| Bq | -3.59660000 | -0.23970000 | -1.00000000 |
| Bq | -3.59660000 | -0.23970000 | 1.00000000  |

**Input geometry for NICS(1) calculation of 2c (neutral)**

|   |             |             |             |
|---|-------------|-------------|-------------|
| C | 4.09710000  | -1.29150000 | 0.13100000  |
| C | 3.57550000  | -0.00330000 | 0.05610000  |
| C | 2.18620000  | 0.23270000  | -0.01370000 |
| C | 1.30330000  | -0.89170000 | -0.00730000 |
| C | 1.86260000  | -2.19310000 | 0.08830000  |
| C | 3.22260000  | -2.40270000 | 0.15270000  |
| C | 1.64050000  | 1.58330000  | -0.09140000 |
| C | 0.22200000  | 1.78970000  | -0.06600000 |
| C | -0.64830000 | 0.63740000  | 0.01020000  |
| C | -0.11370000 | -0.66030000 | -0.05150000 |
| C | 2.48580000  | 2.71260000  | -0.20700000 |
| C | 1.98160000  | 3.99650000  | -0.30180000 |
| C | 0.59150000  | 4.19760000  | -0.29180000 |
| C | -0.26340000 | 3.11720000  | -0.17790000 |
| C | -2.41580000 | -0.87380000 | -0.03110000 |
| C | -3.69640000 | -1.45300000 | -0.04000000 |
| C | -3.78030000 | -2.86200000 | -0.19540000 |
| C | -2.62160000 | -3.60730000 | -0.32640000 |
| C | -1.33690000 | -3.00620000 | -0.29080000 |
| C | -1.21880000 | -1.63150000 | -0.12500000 |
| C | -2.13040000 | 0.51860000  | 0.08190000  |
| C | -3.23960000 | 1.34170000  | 0.27450000  |
| C | -4.55530000 | 0.78350000  | 0.27250000  |
| C | -4.79410000 | -0.56170000 | 0.11270000  |
| O | -3.11910000 | 2.68450000  | 0.48960000  |
| C | 5.51560000  | -1.48830000 | 0.20160000  |
| N | 6.66690000  | -1.65430000 | 0.25780000  |
| H | 4.27280000  | 0.82380000  | 0.06470000  |
| H | 1.21010000  | -3.05140000 | 0.14270000  |
| H | 3.62560000  | -3.40660000 | 0.23230000  |
| H | 3.56060000  | 2.58300000  | -0.23830000 |
| H | 2.66010000  | 4.83940000  | -0.39340000 |
| H | 0.18310000  | 5.20020000  | -0.37960000 |
| H | -1.32750000 | 3.28770000  | -0.17810000 |
| H | -4.75250000 | -3.34680000 | -0.21570000 |
| H | -2.68770000 | -4.68310000 | -0.45770000 |

|    |             |             |             |
|----|-------------|-------------|-------------|
| H  | -0.47770000 | -3.65330000 | -0.41320000 |
| H  | -5.39400000 | 1.46390000  | 0.40760000  |
| H  | -5.81290000 | -0.93870000 | 0.11420000  |
| H  | -3.99380000 | 3.07900000  | 0.60700000  |
| Bq | 2.70790000  | -1.09160000 | 0.06790000  |
| Bq | 0.76500000  | 0.44850000  | -0.03660000 |
| Bq | 1.10970000  | 2.89950000  | -0.18930000 |
| Bq | -1.30540000 | -0.40190000 | -0.02310000 |
| Bq | -3.47190000 | -0.04080000 | 0.11180000  |
| Bq | -2.51160000 | -2.23900000 | -0.16810000 |
| Bq | 2.75520000  | -1.13440000 | -0.93010000 |
| Bq | 2.66060000  | -1.04880000 | 1.06580000  |
| Bq | 0.72690000  | 0.41120000  | -1.03520000 |
| Bq | 0.80310000  | 0.48580000  | 0.96200000  |
| Bq | 1.08750000  | 2.81200000  | -1.18520000 |
| Bq | 1.13180000  | 2.98700000  | 0.80660000  |
| Bq | -1.33520000 | -0.31500000 | -1.01890000 |
| Bq | -1.27560000 | -0.48880000 | 0.97270000  |
| Bq | -2.54500000 | -2.12740000 | -1.16130000 |
| Bq | -2.47820000 | -2.35050000 | 0.82510000  |
| Bq | -3.52260000 | 0.08590000  | -0.87890000 |
| Bq | -3.42130000 | -0.16750000 | 1.10240000  |

**Input geometry for NICS(1) calculation of 2c (anion)**

|   |             |             |            |
|---|-------------|-------------|------------|
| C | 4.09590000  | -1.29350000 | 0.00000000 |
| C | 3.55720000  | -0.00360000 | 0.00000000 |
| C | 2.17140000  | 0.23160000  | 0.00000000 |
| C | 1.27910000  | -0.89570000 | 0.00000000 |
| C | 1.85810000  | -2.19800000 | 0.00000000 |
| C | 3.21920000  | -2.40550000 | 0.00000000 |
| C | 1.62210000  | 1.58790000  | 0.00000000 |
| C | 0.20410000  | 1.79000000  | 0.00000000 |
| C | -0.68210000 | 0.64210000  | 0.00000000 |
| C | -0.13230000 | -0.67570000 | 0.00000000 |
| C | 2.46350000  | 2.72610000  | 0.00000000 |
| C | 1.95360000  | 4.01390000  | 0.00000000 |
| C | 0.56240000  | 4.20860000  | 0.00000000 |
| C | -0.29220000 | 3.11910000  | 0.00000000 |

|    |             |             |             |
|----|-------------|-------------|-------------|
| C  | -2.42880000 | -0.84400000 | 0.00000000  |
| C  | -3.71640000 | -1.42030000 | 0.00000000  |
| C  | -3.81550000 | -2.82180000 | 0.00000000  |
| C  | -2.65750000 | -3.60600000 | 0.00000000  |
| C  | -1.37630000 | -3.02410000 | 0.00000000  |
| C  | -1.23730000 | -1.62930000 | 0.00000000  |
| C  | -2.13410000 | 0.54780000  | 0.00000000  |
| C  | -3.24920000 | 1.47900000  | 0.00000000  |
| C  | -4.58920000 | 0.84710000  | 0.00000000  |
| C  | -4.81980000 | -0.49480000 | 0.00000000  |
| O  | -3.20060000 | 2.73750000  | 0.00000000  |
| C  | 5.51190000  | -1.48560000 | 0.00000000  |
| N  | 6.66760000  | -1.65160000 | 0.00000000  |
| H  | 4.25080000  | 0.82770000  | 0.00000000  |
| H  | 1.21010000  | -3.06140000 | 0.00000000  |
| H  | 3.62410000  | -3.41280000 | 0.00000000  |
| H  | 3.54070000  | 2.60420000  | 0.00000000  |
| H  | 2.63230000  | 4.86360000  | 0.00000000  |
| H  | 0.14940000  | 5.21440000  | 0.00000000  |
| H  | -1.37030000 | 3.25730000  | 0.00000000  |
| H  | -4.79580000 | -3.29500000 | 0.00000000  |
| H  | -2.74270000 | -4.68990000 | 0.00000000  |
| H  | -0.52330000 | -3.69260000 | 0.00000000  |
| H  | -5.41380000 | 1.55540000  | 0.00000000  |
| H  | -5.83900000 | -0.88030000 | 0.00000000  |
| Bq | 2.69680000  | -1.09410000 | 0.00000000  |
| Bq | 0.74370000  | 0.44670000  | 0.00000000  |
| Bq | 1.08560000  | 2.90760000  | 0.00000000  |
| Bq | -1.32290000 | -0.39180000 | 0.00000000  |
| Bq | -3.48960000 | 0.01910000  | 0.00000000  |
| Bq | -2.53860000 | -2.22420000 | 0.00000000  |
| Bq | 2.69680000  | -1.09410000 | -1.00000000 |
| Bq | 2.69680000  | -1.09410000 | 1.00000000  |
| Bq | 0.74370000  | 0.44670000  | -1.00000000 |
| Bq | 0.74370000  | 0.44670000  | 1.00000000  |
| Bq | 1.08560000  | 2.90760000  | -1.00000000 |
| Bq | 1.08560000  | 2.90760000  | 1.00000000  |
| Bq | -1.32290000 | -0.39180000 | 1.00000000  |

|    |             |             |             |
|----|-------------|-------------|-------------|
| Bq | -1.32290000 | -0.39180000 | -1.00000000 |
| Bq | -2.53860000 | -2.22420000 | -1.00000000 |
| Bq | -2.53860000 | -2.22420000 | 1.00000000  |
| Bq | -3.48960000 | 0.01910000  | 1.00000000  |
| Bq | -3.48960000 | 0.01910000  | -1.00000000 |

**Input geometry for NICS(1) calculation of 3a (neutral)**

|   |             |             |             |
|---|-------------|-------------|-------------|
| C | 3.86300000  | -1.91400000 | 0.00010000  |
| C | 3.57420000  | -0.56090000 | 0.00010000  |
| C | 2.24220000  | -0.09080000 | 0.00000000  |
| C | 1.17510000  | -1.04640000 | 0.00000000  |
| C | 1.51030000  | -2.42260000 | 0.00010000  |
| C | 2.82050000  | -2.85910000 | 0.00010000  |
| C | 1.93640000  | 1.33690000  | 0.00000000  |
| C | 0.57410000  | 1.77730000  | 0.00000000  |
| C | -0.47520000 | 0.79310000  | 0.00000000  |
| C | -0.18250000 | -0.57490000 | 0.00000000  |
| C | 2.95800000  | 2.31730000  | -0.00010000 |
| C | 2.67350000  | 3.67090000  | -0.00020000 |
| C | 1.33520000  | 4.10250000  | -0.00020000 |
| C | 0.31390000  | 3.17160000  | -0.00010000 |
| C | -2.49010000 | -0.35310000 | 0.00000000  |
| C | -3.86250000 | -0.64710000 | 0.00000000  |
| C | -4.22200000 | -2.02520000 | -0.00010000 |
| C | -3.23220000 | -2.99090000 | -0.00030000 |
| C | -1.84710000 | -2.66170000 | -0.00030000 |
| C | -1.45960000 | -1.33060000 | -0.00010000 |
| C | -1.94900000 | 0.96060000  | 0.00010000  |
| C | -2.84820000 | 2.01570000  | 0.00030000  |
| C | -4.24720000 | 1.74840000  | 0.00030000  |
| C | -4.75570000 | 0.46300000  | 0.00020000  |
| O | 5.18400000  | -2.28340000 | 0.00010000  |
| H | -2.53680000 | 3.05280000  | 0.00040000  |
| H | 4.41360000  | 0.12210000  | 0.00000000  |
| H | 0.72550000  | -3.16460000 | 0.00020000  |
| H | 3.04310000  | -3.92390000 | 0.00020000  |
| H | 3.99750000  | 2.01300000  | -0.00010000 |
| H | 3.48310000  | 4.39460000  | -0.00020000 |

|    |             |             |             |
|----|-------------|-------------|-------------|
| H  | 1.10180000  | 5.16330000  | -0.00030000 |
| H  | -0.70790000 | 3.52180000  | -0.00020000 |
| H  | -5.26990000 | -2.31310000 | -0.00010000 |
| H  | -3.51170000 | -4.04060000 | -0.00040000 |
| H  | -1.13830000 | -3.48050000 | -0.00040000 |
| H  | -4.93140000 | 2.59210000  | 0.00040000  |
| H  | -5.82950000 | 0.29640000  | 0.00020000  |
| H  | 5.25810000  | -3.24640000 | 0.00020000  |
| Bq | 2.53090000  | -1.48230000 | 0.00010000  |
| Bq | 0.87830000  | 0.36590000  | 0.00000000  |
| Bq | 1.63190000  | 2.72940000  | -0.00010000 |
| Bq | -1.31130000 | -0.10100000 | 0.00000000  |
| Bq | -3.35880000 | 0.69790000  | 0.00020000  |
| Bq | -2.85230000 | -1.66810000 | -0.00010000 |
| Bq | 2.53090000  | -1.48230000 | -0.99990000 |
| Bq | 2.53080000  | -1.48230000 | 1.00010000  |
| Bq | 0.87830000  | 0.36590000  | -1.00000000 |
| Bq | 0.87830000  | 0.36590000  | 1.00000000  |
| Bq | 1.63180000  | 2.72930000  | -1.00010000 |
| Bq | 1.63190000  | 2.72950000  | 0.99990000  |
| Bq | -1.31130000 | -0.10090000 | -1.00000000 |
| Bq | -1.31130000 | -0.10110000 | 1.00000000  |
| Bq | -2.85230000 | -1.66800000 | -1.00010000 |
| Bq | -2.85220000 | -1.66820000 | 0.99990000  |
| Bq | -3.35880000 | 0.69800000  | -0.99980000 |
| Bq | -3.35870000 | 0.69780000  | 1.00010000  |

**Input geometry for NICS(1) calculation of 3a (anion)**

|   |             |             |            |
|---|-------------|-------------|------------|
| C | 3.92310000  | -2.05320000 | 0.00000000 |
| C | 3.58950000  | -0.65310000 | 0.00000000 |
| C | 2.28590000  | -0.15830000 | 0.00000000 |
| C | 1.17330000  | -1.08830000 | 0.00000000 |
| C | 1.48900000  | -2.48300000 | 0.00000000 |
| C | 2.77560000  | -2.95000000 | 0.00000000 |
| C | 1.99290000  | 1.28400000  | 0.00000000 |
| C | 0.63740000  | 1.75650000  | 0.00000000 |
| C | -0.43300000 | 0.80040000  | 0.00000000 |
| C | -0.15060000 | -0.58600000 | 0.00000000 |



|    |             |             |             |
|----|-------------|-------------|-------------|
| C  | 3.03060000  | 2.24370000  | 0.00000000  |
| C  | 2.78390000  | 3.60840000  | 0.00000000  |
| C  | 1.45630000  | 4.07010000  | 0.00000000  |
| C  | 0.41390000  | 3.15950000  | 0.00000000  |
| C  | -2.46380000 | -0.31750000 | 0.00000000  |
| C  | -3.84280000 | -0.58290000 | 0.00000000  |
| C  | -4.22760000 | -1.95350000 | 0.00000000  |
| C  | -3.25650000 | -2.94020000 | 0.00000000  |
| C  | -1.86620000 | -2.63960000 | 0.00000000  |
| C  | -1.45210000 | -1.31480000 | 0.00000000  |
| C  | -1.88610000 | 0.99050000  | 0.00000000  |
| C  | -2.77620000 | 2.06240000  | 0.00000000  |
| C  | -4.17900000 | 1.81780000  | 0.00000000  |
| C  | -4.72000000 | 0.54500000  | 0.00000000  |
| O  | 5.11130000  | -2.48550000 | 0.00000000  |
| H  | 4.44340000  | 0.01510000  | 0.00000000  |
| H  | 0.68180000  | -3.20380000 | 0.00000000  |
| H  | 2.98160000  | -4.01800000 | 0.00000000  |
| H  | 4.06040000  | 1.90660000  | 0.00000000  |
| H  | 3.61330000  | 4.31100000  | 0.00000000  |
| H  | 1.24390000  | 5.13680000  | 0.00000000  |
| H  | -0.60090000 | 3.53300000  | 0.00000000  |
| H  | -5.28230000 | -2.22030000 | 0.00000000  |
| H  | -3.55810000 | -3.98500000 | 0.00000000  |
| H  | -1.16890000 | -3.46770000 | 0.00000000  |
| H  | -2.44560000 | 3.09390000  | 0.00000000  |
| H  | -4.84670000 | 2.67670000  | 0.00000000  |
| H  | -5.79740000 | 0.39880000  | 0.00000000  |
| Bq | -2.85150000 | -1.62480000 | 0.00000000  |
| Bq | -3.31130000 | 0.75260000  | 0.00000000  |
| Bq | -1.27710000 | -0.08550000 | 0.00000000  |
| Bq | 0.91760000  | 0.33470000  | 0.00000000  |
| Bq | 1.71920000  | 2.68700000  | 0.00000000  |
| Bq | 2.53940000  | -1.56430000 | 0.00000000  |
| Bq | 2.53940000  | -1.56430000 | -1.00000000 |
| Bq | 2.53940000  | -1.56430000 | 1.00000000  |
| Bq | 0.91760000  | 0.33470000  | -1.00000000 |
| Bq | 0.91760000  | 0.33470000  | 1.00000000  |

|    |             |             |             |
|----|-------------|-------------|-------------|
| Bq | 1.71920000  | 2.68700000  | -1.00000000 |
| Bq | 1.71920000  | 2.68700000  | 1.00000000  |
| Bq | -1.27710000 | -0.08550000 | -1.00000000 |
| Bq | -1.27710000 | -0.08550000 | 1.00000000  |
| Bq | -2.85150000 | -1.62480000 | 1.00000000  |
| Bq | -2.85150000 | -1.62480000 | -1.00000000 |
| Bq | -3.31130000 | 0.75260000  | 1.00000000  |
| Bq | -3.31130000 | 0.75260000  | -1.00000000 |

**Input geometry for NICS(1) calculation of 3b (neutral)**

|   |             |             |             |
|---|-------------|-------------|-------------|
| C | 4.09590000  | -0.81730000 | 0.10110000  |
| C | 3.45110000  | 0.41060000  | 0.03840000  |
| C | 2.04700000  | 0.51240000  | -0.02090000 |
| C | 1.27040000  | -0.68870000 | -0.01630000 |
| C | 1.95650000  | -1.92190000 | 0.06680000  |
| C | 3.33770000  | -2.00360000 | 0.12190000  |
| C | 1.37030000  | 1.80490000  | -0.08790000 |
| C | -0.06120000 | 1.87620000  | -0.05830000 |
| C | -0.82110000 | 0.64680000  | 0.01270000  |
| C | -0.16510000 | -0.59070000 | -0.05020000 |
| C | 2.10440000  | 3.00970000  | -0.19740000 |
| C | 1.48300000  | 4.24260000  | -0.28130000 |
| C | 0.08040000  | 4.31150000  | -0.26550000 |
| C | -0.66830000 | 3.15370000  | -0.15830000 |
| C | -2.43930000 | -1.02550000 | -0.03110000 |
| C | -3.65750000 | -1.72580000 | -0.04150000 |
| C | -3.60390000 | -3.13690000 | -0.19450000 |
| C | -2.37820000 | -3.76640000 | -0.32170000 |
| C | -1.15750000 | -3.04300000 | -0.28590000 |
| C | -1.17320000 | -1.66350000 | -0.12320000 |
| C | -2.28750000 | 0.38810000  | 0.08070000  |
| C | -3.47120000 | 1.09890000  | 0.26730000  |
| C | -4.72800000 | 0.41680000  | 0.26280000  |
| C | -4.83760000 | -0.94520000 | 0.10640000  |
| O | -3.48430000 | 2.45030000  | 0.47890000  |
| O | 5.46350000  | -0.77670000 | 0.15270000  |
| C | 6.18020000  | -2.00220000 | 0.22920000  |
| H | 4.08080000  | 1.29080000  | 0.04900000  |

|    |             |             |             |
|----|-------------|-------------|-------------|
| H  | 1.39600000  | -2.84360000 | 0.11950000  |
| H  | 3.81140000  | -2.97530000 | 0.19330000  |
| H  | 3.18650000  | 2.97800000  | -0.23100000 |
| H  | 2.07940000  | 5.14620000  | -0.36820000 |
| H  | -0.42180000 | 5.27170000  | -0.34350000 |
| H  | -1.74390000 | 3.22350000  | -0.15380000 |
| H  | -4.52470000 | -3.71380000 | -0.21540000 |
| H  | -2.33960000 | -4.84410000 | -0.45050000 |
| H  | -0.23860000 | -3.60310000 | -0.40430000 |
| H  | -5.62830000 | 1.01480000  | 0.39350000  |
| H  | -5.81540000 | -1.41860000 | 0.10580000  |
| H  | -4.39500000 | 2.75540000  | 0.58580000  |
| H  | 7.23550000  | -1.72730000 | 0.25460000  |
| H  | 5.92910000  | -2.55860000 | 1.14110000  |
| H  | 5.99150000  | -2.63360000 | -0.64830000 |
| Bq | 2.69310000  | -0.75140000 | 0.04850000  |
| Bq | 0.60670000  | 0.59350000  | -0.03680000 |
| Bq | 0.71810000  | 3.06640000  | -0.17480000 |
| Bq | -1.37720000 | -0.44900000 | -0.02220000 |
| Bq | -3.57020000 | -0.29880000 | 0.10740000  |
| Bq | -2.40160000 | -2.39350000 | -0.16630000 |
| Bq | 2.73720000  | -0.78370000 | -0.95000000 |
| Bq | 2.64900000  | -0.71910000 | 1.04700000  |
| Bq | 0.57080000  | 0.55800000  | -1.03550000 |
| Bq | 0.64270000  | 0.62890000  | 0.96190000  |
| Bq | 0.70110000  | 2.98510000  | -1.17130000 |
| Bq | 0.73510000  | 3.14770000  | 0.82180000  |
| Bq | -1.43410000 | -0.38830000 | -1.01880000 |
| Bq | -1.32030000 | -0.50960000 | 0.97430000  |
| Bq | -2.44890000 | -2.29660000 | -1.16050000 |
| Bq | -2.35430000 | -2.49050000 | 0.82780000  |
| Bq | -3.62990000 | -0.18020000 | -0.88370000 |
| Bq | -3.51050000 | -0.41740000 | 1.09860000  |

**Input geometry for NICS(1) calculation of 3b (anion)**

|   |            |             |            |
|---|------------|-------------|------------|
| C | 4.08950000 | -0.81540000 | 0.00000000 |
| C | 3.43790000 | 0.40870000  | 0.00000000 |
| C | 2.03070000 | 0.50950000  | 0.00000000 |

|   |             |             |            |
|---|-------------|-------------|------------|
| C | 1.25090000  | -0.69360000 | 0.00000000 |
| C | 1.95210000  | -1.92300000 | 0.00000000 |
| C | 3.33810000  | -2.00220000 | 0.00000000 |
| C | 1.35220000  | 1.80530000  | 0.00000000 |
| C | -0.07980000 | 1.87100000  | 0.00000000 |
| C | -0.85400000 | 0.64560000  | 0.00000000 |
| C | -0.18640000 | -0.60700000 | 0.00000000 |
| C | 2.08100000  | 3.01910000  | 0.00000000 |
| C | 1.45180000  | 4.25330000  | 0.00000000 |
| C | 0.04750000  | 4.31380000  | 0.00000000 |
| C | -0.69960000 | 3.14780000  | 0.00000000 |
| C | -2.45950000 | -0.99340000 | 0.00000000 |
| C | -3.68490000 | -1.69450000 | 0.00000000 |
| C | -3.64580000 | -3.09950000 | 0.00000000 |
| C | -2.41630000 | -3.76700000 | 0.00000000 |
| C | -1.19740000 | -3.06160000 | 0.00000000 |
| C | -1.19410000 | -1.66040000 | 0.00000000 |
| C | -2.30060000 | 0.41610000  | 0.00000000 |
| C | -3.49480000 | 1.23610000  | 0.00000000 |
| C | -4.76830000 | 0.47830000  | 0.00000000 |
| C | -4.87180000 | -0.88060000 | 0.00000000 |
| O | -3.56860000 | 2.49640000  | 0.00000000 |
| O | 5.47430000  | -0.77040000 | 0.00000000 |
| C | 6.17720000  | -1.99710000 | 0.00000000 |
| H | 4.06260000  | 1.29350000  | 0.00000000 |
| H | 1.39600000  | -2.84910000 | 0.00000000 |
| H | 3.81380000  | -2.97660000 | 0.00000000 |
| H | 3.16500000  | 2.99670000  | 0.00000000 |
| H | 2.04620000  | 5.16420000  | 0.00000000 |
| H | -0.45990000 | 5.27580000  | 0.00000000 |
| H | -1.78680000 | 3.18190000  | 0.00000000 |
| H | -4.57540000 | -3.66650000 | 0.00000000 |
| H | -2.39530000 | -4.85440000 | 0.00000000 |
| H | -0.28210000 | -3.64280000 | 0.00000000 |
| H | -5.65720000 | 1.10480000  | 0.00000000 |
| H | -5.85010000 | -1.36130000 | 0.00000000 |
| H | 7.23840000  | -1.73780000 | 0.00000000 |
| H | 5.95340000  | -2.59610000 | 0.89410000 |

|    |             |             |             |
|----|-------------|-------------|-------------|
| H  | 5.95340000  | -2.59610000 | -0.89410000 |
| Bq | 2.68320000  | -0.75270000 | 0.00000000  |
| Bq | 0.58560000  | 0.58850000  | 0.00000000  |
| Bq | 0.69220000  | 3.06840000  | 0.00000000  |
| Bq | -1.39890000 | -0.43980000 | 0.00000000  |
| Bq | -2.43300000 | -2.37940000 | 0.00000000  |
| Bq | -3.59660000 | -0.23970000 | 0.00000000  |
| Bq | 2.68320000  | -0.75270000 | 1.00000000  |
| Bq | 2.68320000  | -0.75270000 | -1.00000000 |
| Bq | 0.58560000  | 0.58850000  | -1.00000000 |
| Bq | 0.58560000  | 0.58850000  | 1.00000000  |
| Bq | 0.69220000  | 3.06840000  | -1.00000000 |
| Bq | 0.69220000  | 3.06840000  | 1.00000000  |
| Bq | -1.39890000 | -0.43980000 | -1.00000000 |
| Bq | -1.39890000 | -0.43980000 | 1.00000000  |
| Bq | -2.43300000 | -2.37940000 | -1.00000000 |
| Bq | -2.43300000 | -2.37940000 | 1.00000000  |
| Bq | -3.59660000 | -0.23970000 | -1.00000000 |
| Bq | -3.59660000 | -0.23970000 | 1.00000000  |

**Input geometry for NICS(1) calculation of 3c (neutral)**

|   |             |             |             |
|---|-------------|-------------|-------------|
| C | 4.09710000  | -1.29150000 | 0.13100000  |
| C | 3.57550000  | -0.00330000 | 0.05610000  |
| C | 2.18620000  | 0.23270000  | -0.01370000 |
| C | 1.30330000  | -0.89170000 | -0.00730000 |
| C | 1.86260000  | -2.19310000 | 0.08830000  |
| C | 3.22260000  | -2.40270000 | 0.15270000  |
| C | 1.64050000  | 1.58330000  | -0.09140000 |
| C | 0.22200000  | 1.78970000  | -0.06600000 |
| C | -0.64830000 | 0.63740000  | 0.01020000  |
| C | -0.11370000 | -0.66030000 | -0.05150000 |
| C | 2.48580000  | 2.71260000  | -0.20700000 |
| C | 1.98160000  | 3.99650000  | -0.30180000 |
| C | 0.59150000  | 4.19760000  | -0.29180000 |
| C | -0.26340000 | 3.11720000  | -0.17790000 |
| C | -2.41580000 | -0.87380000 | -0.03110000 |
| C | -3.69640000 | -1.45300000 | -0.04000000 |
| C | -3.78030000 | -2.86200000 | -0.19540000 |

|    |             |             |             |
|----|-------------|-------------|-------------|
| C  | -2.62160000 | -3.60730000 | -0.32640000 |
| C  | -1.33690000 | -3.00620000 | -0.29080000 |
| C  | -1.21880000 | -1.63150000 | -0.12500000 |
| C  | -2.13040000 | 0.51860000  | 0.08190000  |
| C  | -3.23960000 | 1.34170000  | 0.27450000  |
| C  | -4.55530000 | 0.78350000  | 0.27250000  |
| C  | -4.79410000 | -0.56170000 | 0.11270000  |
| O  | -3.11910000 | 2.68450000  | 0.48960000  |
| C  | 5.51560000  | -1.48830000 | 0.20160000  |
| N  | 6.66690000  | -1.65430000 | 0.25780000  |
| H  | 4.27280000  | 0.82380000  | 0.06470000  |
| H  | 1.21010000  | -3.05140000 | 0.14270000  |
| H  | 3.62560000  | -3.40660000 | 0.23230000  |
| H  | 3.56060000  | 2.58300000  | -0.23830000 |
| H  | 2.66010000  | 4.83940000  | -0.39340000 |
| H  | 0.18310000  | 5.20020000  | -0.37960000 |
| H  | -1.32750000 | 3.28770000  | -0.17810000 |
| H  | -4.75250000 | -3.34680000 | -0.21570000 |
| H  | -2.68770000 | -4.68310000 | -0.45770000 |
| H  | -0.47770000 | -3.65330000 | -0.41320000 |
| H  | -5.39400000 | 1.46390000  | 0.40760000  |
| H  | -5.81290000 | -0.93870000 | 0.11420000  |
| H  | -3.99380000 | 3.07900000  | 0.60700000  |
| Bq | 2.70790000  | -1.09160000 | 0.06790000  |
| Bq | 0.76500000  | 0.44850000  | -0.03660000 |
| Bq | 1.10970000  | 2.89950000  | -0.18930000 |
| Bq | -1.30540000 | -0.40190000 | -0.02310000 |
| Bq | -3.47190000 | -0.04080000 | 0.11180000  |
| Bq | -2.51160000 | -2.23900000 | -0.16810000 |
| Bq | 2.75520000  | -1.13440000 | -0.93010000 |
| Bq | 2.66060000  | -1.04880000 | 1.06580000  |
| Bq | 0.72690000  | 0.41120000  | -1.03520000 |
| Bq | 0.80310000  | 0.48580000  | 0.96200000  |
| Bq | 1.08750000  | 2.81200000  | -1.18520000 |
| Bq | 1.13180000  | 2.98700000  | 0.80660000  |
| Bq | -1.33520000 | -0.31500000 | -1.01890000 |
| Bq | -1.27560000 | -0.48880000 | 0.97270000  |
| Bq | -2.54500000 | -2.12740000 | -1.16130000 |

|    |             |             |             |
|----|-------------|-------------|-------------|
| Bq | -2.47820000 | -2.35050000 | 0.82510000  |
| Bq | -3.52260000 | 0.08590000  | -0.87890000 |
| Bq | -3.42130000 | -0.16750000 | 1.10240000  |

**Input geometry for NICS(1) calculation of 3c (anion)**

|   |             |             |            |
|---|-------------|-------------|------------|
| C | 4.09590000  | -1.29350000 | 0.00000000 |
| C | 3.55720000  | -0.00360000 | 0.00000000 |
| C | 2.17140000  | 0.23160000  | 0.00000000 |
| C | 1.27910000  | -0.89570000 | 0.00000000 |
| C | 1.85810000  | -2.19800000 | 0.00000000 |
| C | 3.21920000  | -2.40550000 | 0.00000000 |
| C | 1.62210000  | 1.58790000  | 0.00000000 |
| C | 0.20410000  | 1.79000000  | 0.00000000 |
| C | -0.68210000 | 0.64210000  | 0.00000000 |
| C | -0.13230000 | -0.67570000 | 0.00000000 |
| C | 2.46350000  | 2.72610000  | 0.00000000 |
| C | 1.95360000  | 4.01390000  | 0.00000000 |
| C | 0.56240000  | 4.20860000  | 0.00000000 |
| C | -0.29220000 | 3.11910000  | 0.00000000 |
| C | -2.42880000 | -0.84400000 | 0.00000000 |
| C | -3.71640000 | -1.42030000 | 0.00000000 |
| C | -3.81550000 | -2.82180000 | 0.00000000 |
| C | -2.65750000 | -3.60600000 | 0.00000000 |
| C | -1.37630000 | -3.02410000 | 0.00000000 |
| C | -1.23730000 | -1.62930000 | 0.00000000 |
| C | -2.13410000 | 0.54780000  | 0.00000000 |
| C | -3.24920000 | 1.47900000  | 0.00000000 |
| C | -4.58920000 | 0.84710000  | 0.00000000 |
| C | -4.81980000 | -0.49480000 | 0.00000000 |
| O | -3.20060000 | 2.73750000  | 0.00000000 |
| C | 5.51190000  | -1.48560000 | 0.00000000 |
| N | 6.66760000  | -1.65160000 | 0.00000000 |
| H | 4.25080000  | 0.82770000  | 0.00000000 |
| H | 1.21010000  | -3.06140000 | 0.00000000 |
| H | 3.62410000  | -3.41280000 | 0.00000000 |
| H | 3.54070000  | 2.60420000  | 0.00000000 |
| H | 2.63230000  | 4.86360000  | 0.00000000 |
| H | 0.14940000  | 5.21440000  | 0.00000000 |

|    |             |             |             |
|----|-------------|-------------|-------------|
| H  | -1.37030000 | 3.25730000  | 0.00000000  |
| H  | -4.79580000 | -3.29500000 | 0.00000000  |
| H  | -2.74270000 | -4.68990000 | 0.00000000  |
| H  | -0.52330000 | -3.69260000 | 0.00000000  |
| H  | -5.41380000 | 1.55540000  | 0.00000000  |
| H  | -5.83900000 | -0.88030000 | 0.00000000  |
| Bq | 2.69680000  | -1.09410000 | 0.00000000  |
| Bq | 0.74370000  | 0.44670000  | 0.00000000  |
| Bq | 1.08560000  | 2.90760000  | 0.00000000  |
| Bq | -1.32290000 | -0.39180000 | 0.00000000  |
| Bq | -3.48960000 | 0.01910000  | 0.00000000  |
| Bq | -2.53860000 | -2.22420000 | 0.00000000  |
| Bq | 2.69680000  | -1.09410000 | -1.00000000 |
| Bq | 2.69680000  | -1.09410000 | 1.00000000  |
| Bq | 0.74370000  | 0.44670000  | -1.00000000 |
| Bq | 0.74370000  | 0.44670000  | 1.00000000  |
| Bq | 1.08560000  | 2.90760000  | -1.00000000 |
| Bq | 1.08560000  | 2.90760000  | 1.00000000  |
| Bq | -1.32290000 | -0.39180000 | 1.00000000  |
| Bq | -1.32290000 | -0.39180000 | -1.00000000 |
| Bq | -2.53860000 | -2.22420000 | -1.00000000 |
| Bq | -2.53860000 | -2.22420000 | 1.00000000  |
| Bq | -3.48960000 | 0.01910000  | 1.00000000  |
| Bq | -3.48960000 | 0.01910000  | -1.00000000 |



## 7. $^1\text{H}$ and $^{13}\text{C}$ NMR spectra

S1:  $^1\text{H}$  NMR,  $\text{CDCl}_3$ , 600 MHz

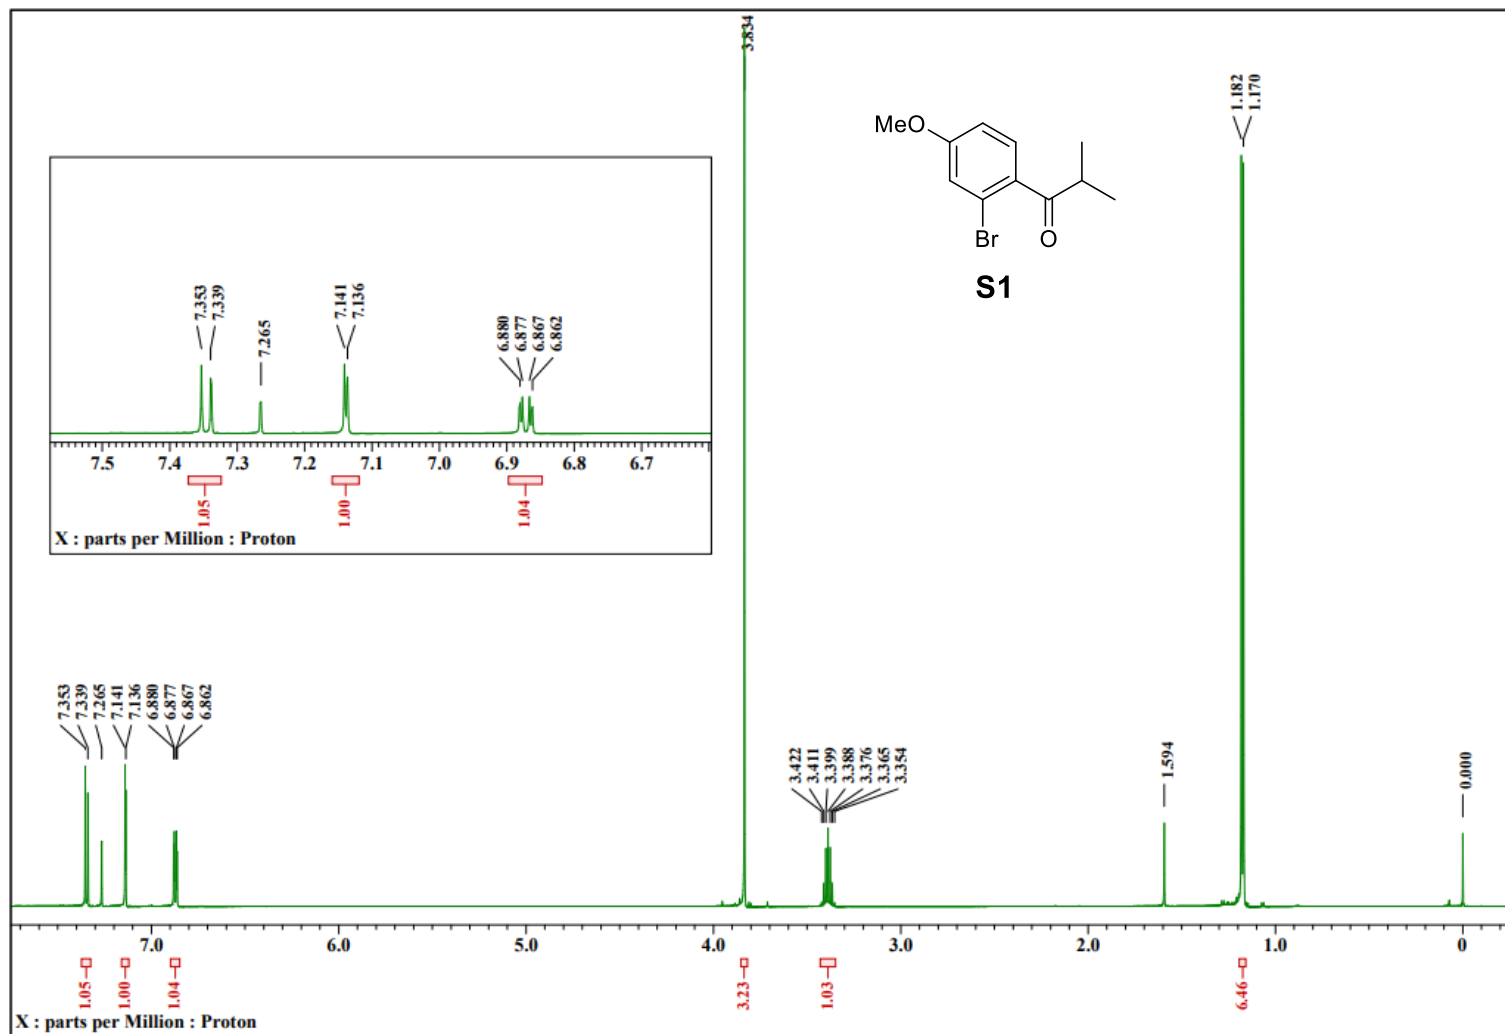

S1:  $^{13}\text{C}$  NMR,  $\text{CDCl}_3$ , 151 MHz

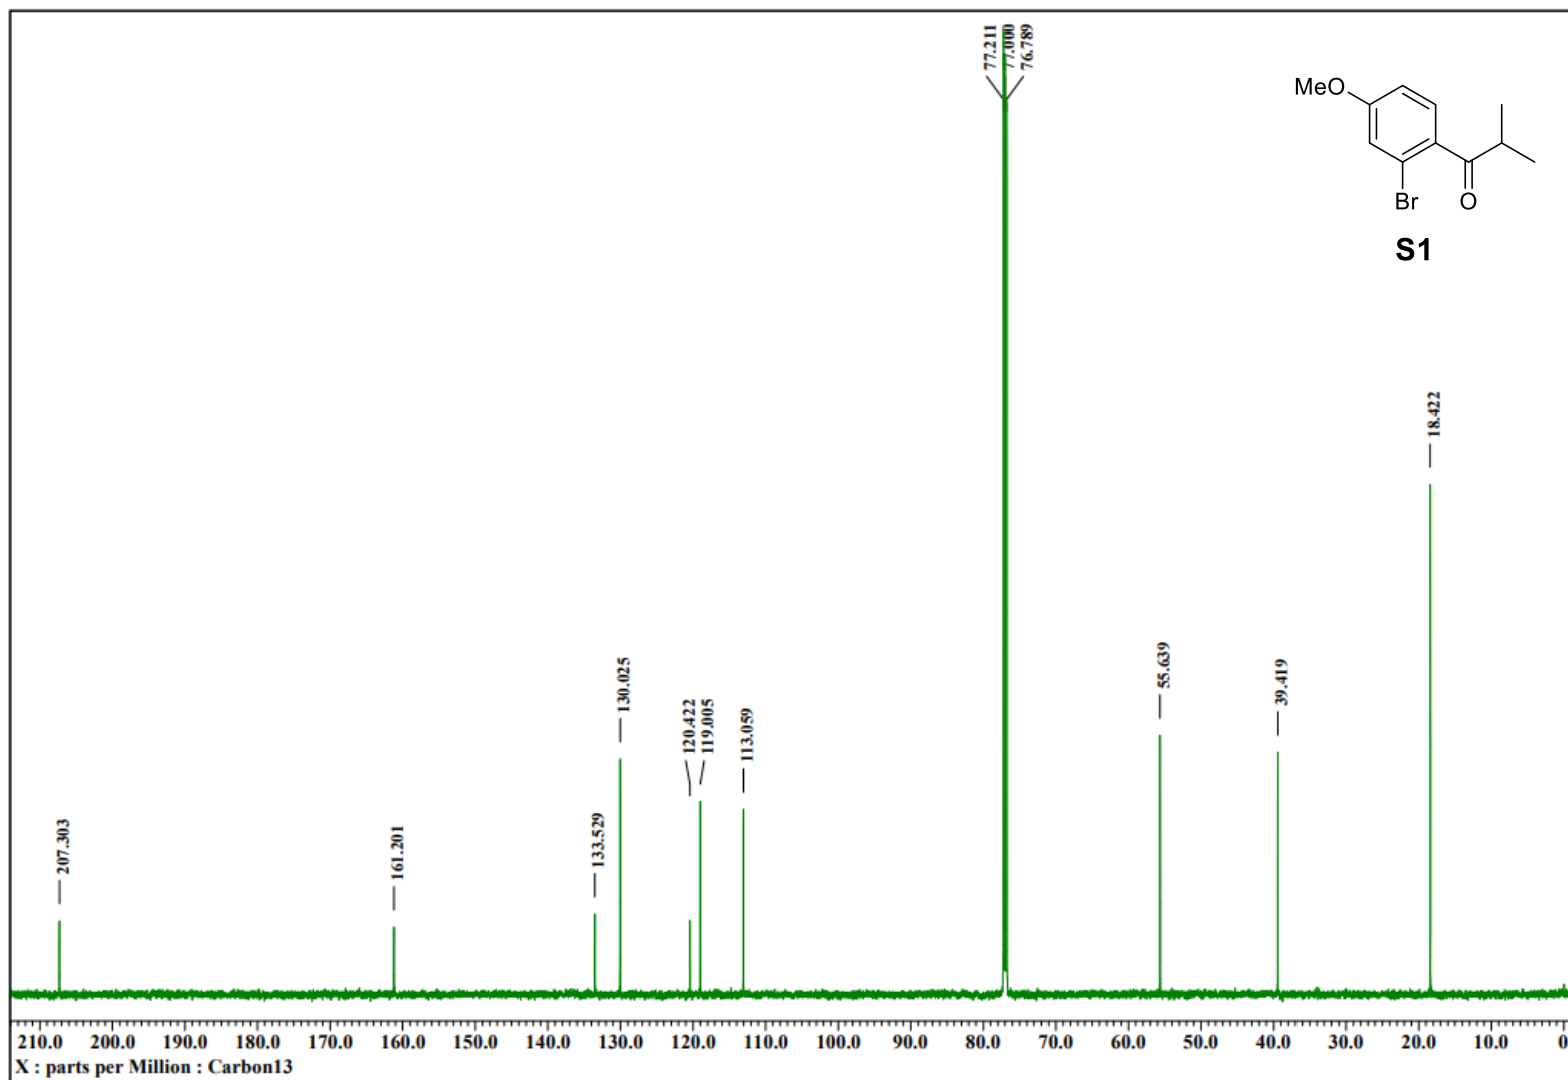

1b:  $^1\text{H}$  NMR,  $\text{CDCl}_3$ , 600 MHz

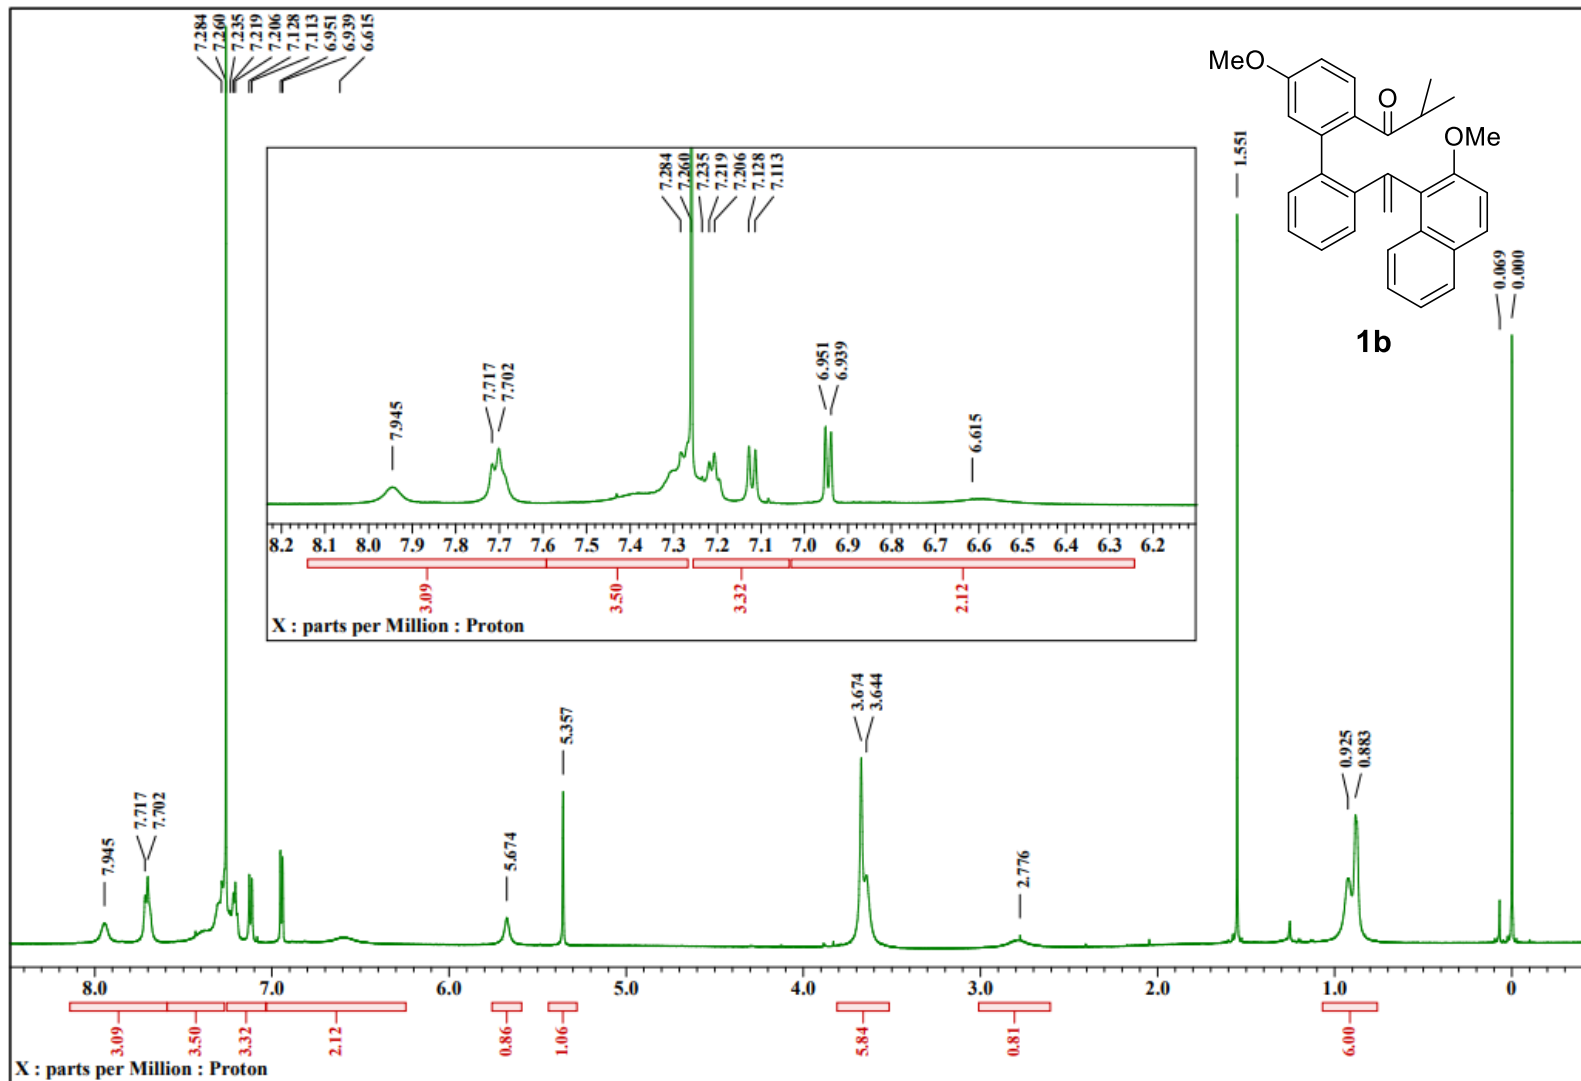

1b:  $^{13}\text{C}$  NMR,  $\text{CDCl}_3$ , 151 MHz

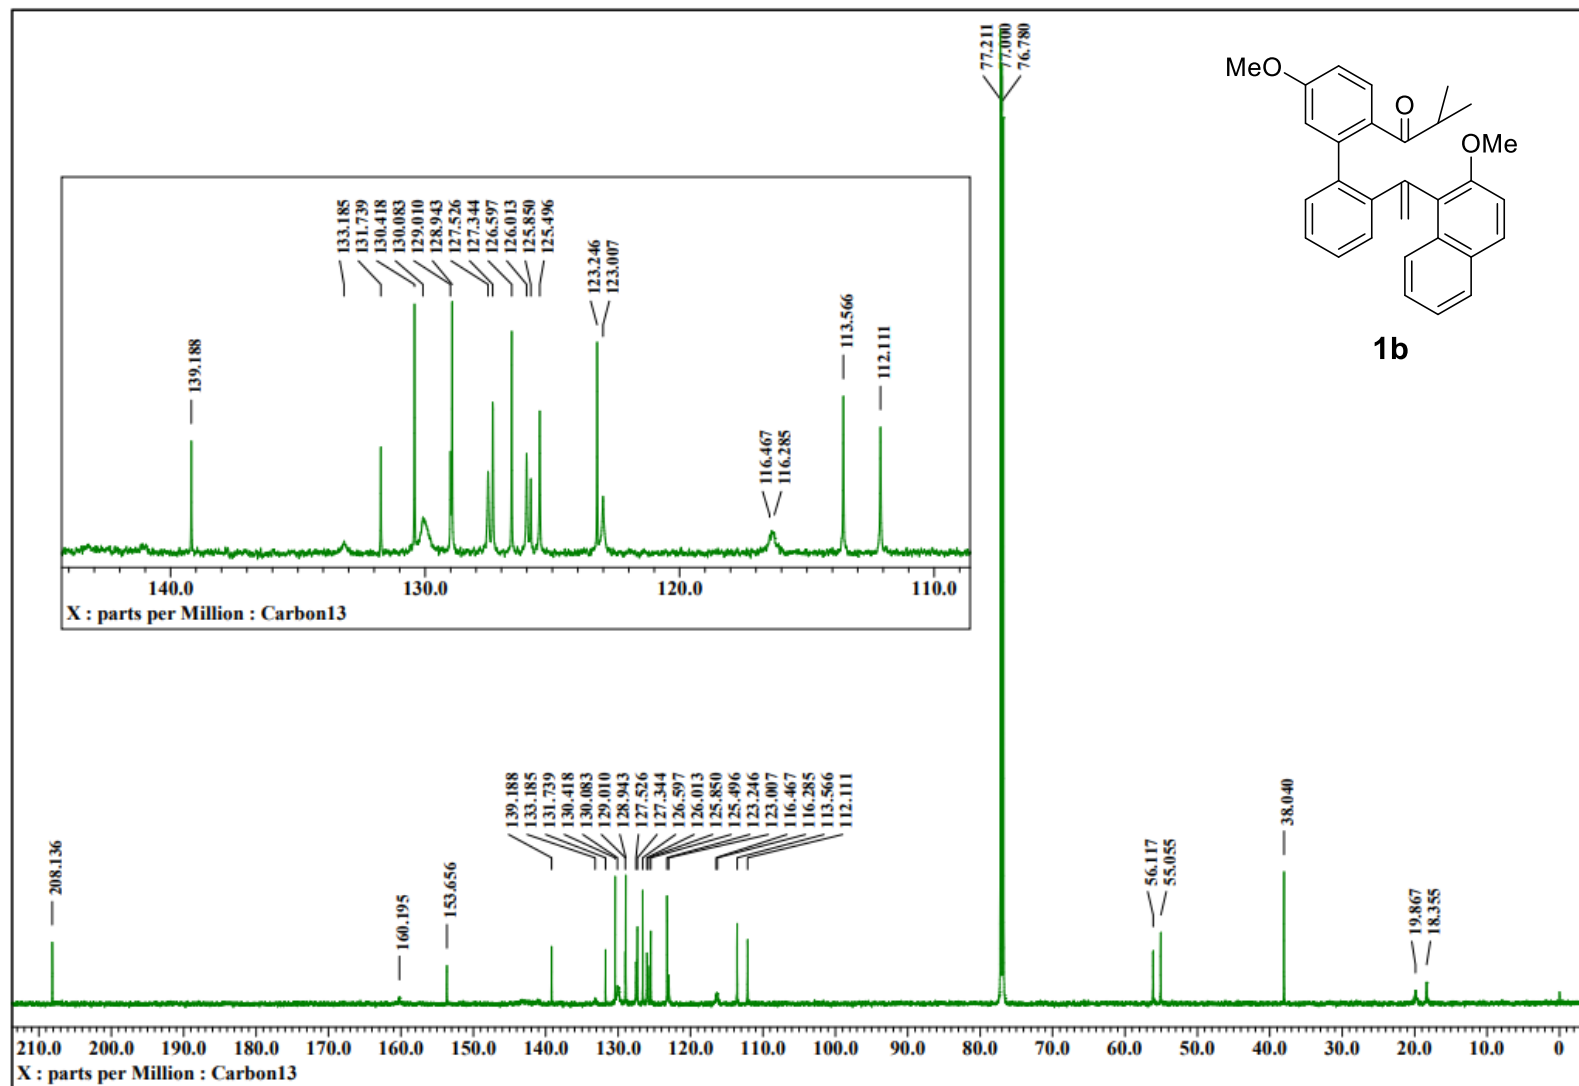

2b: <sup>1</sup>H NMR, acetone-d<sub>6</sub>, 600 MHz

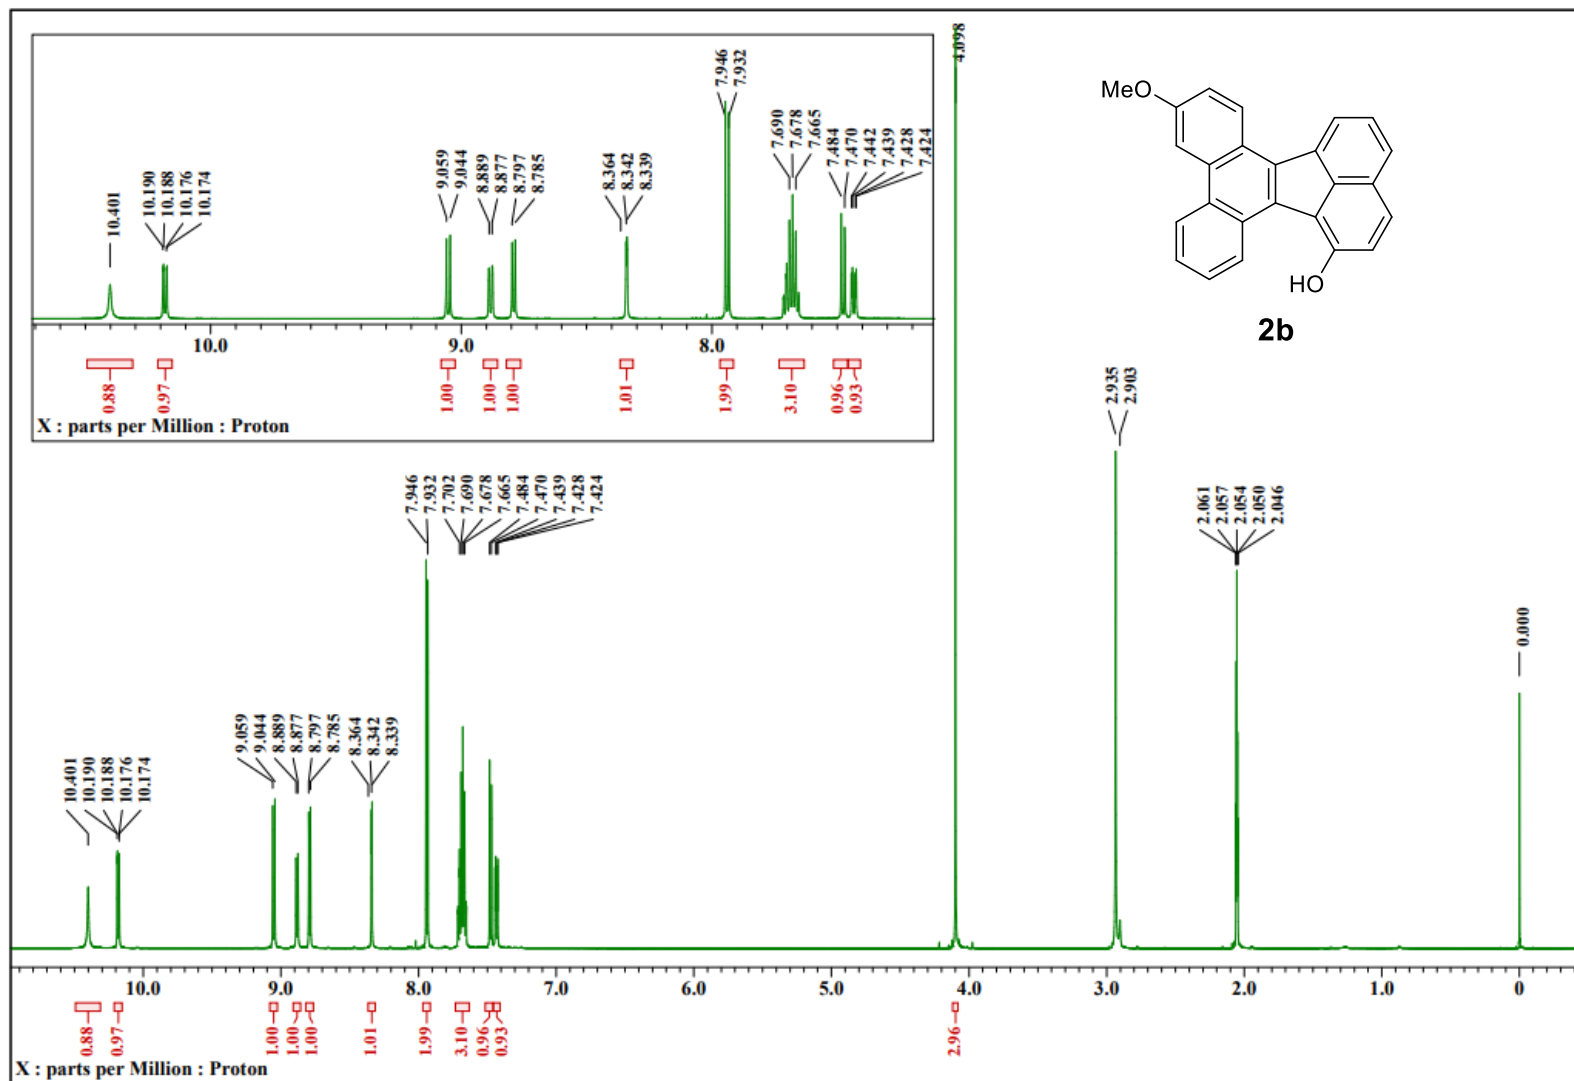

2b: <sup>13</sup>C NMR, acetone-d<sub>6</sub>, 151 MHz

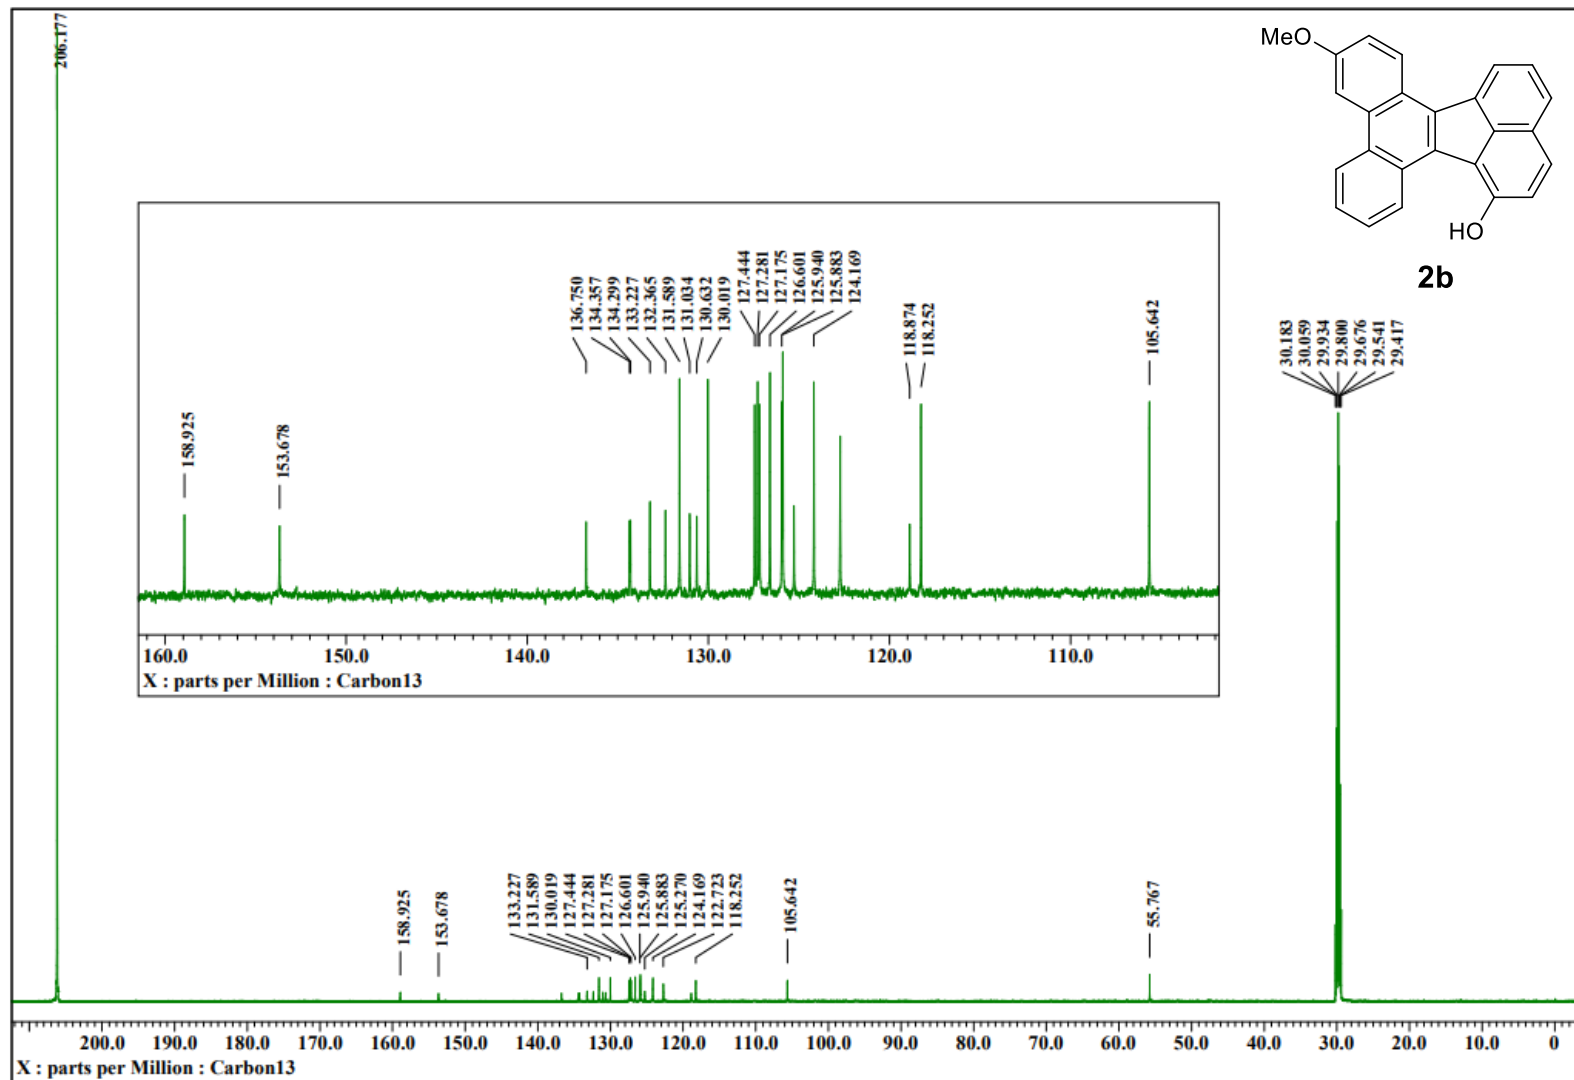

5:  $^1\text{H}$  NMR,  $\text{CDCl}_3$ , 600 MHz

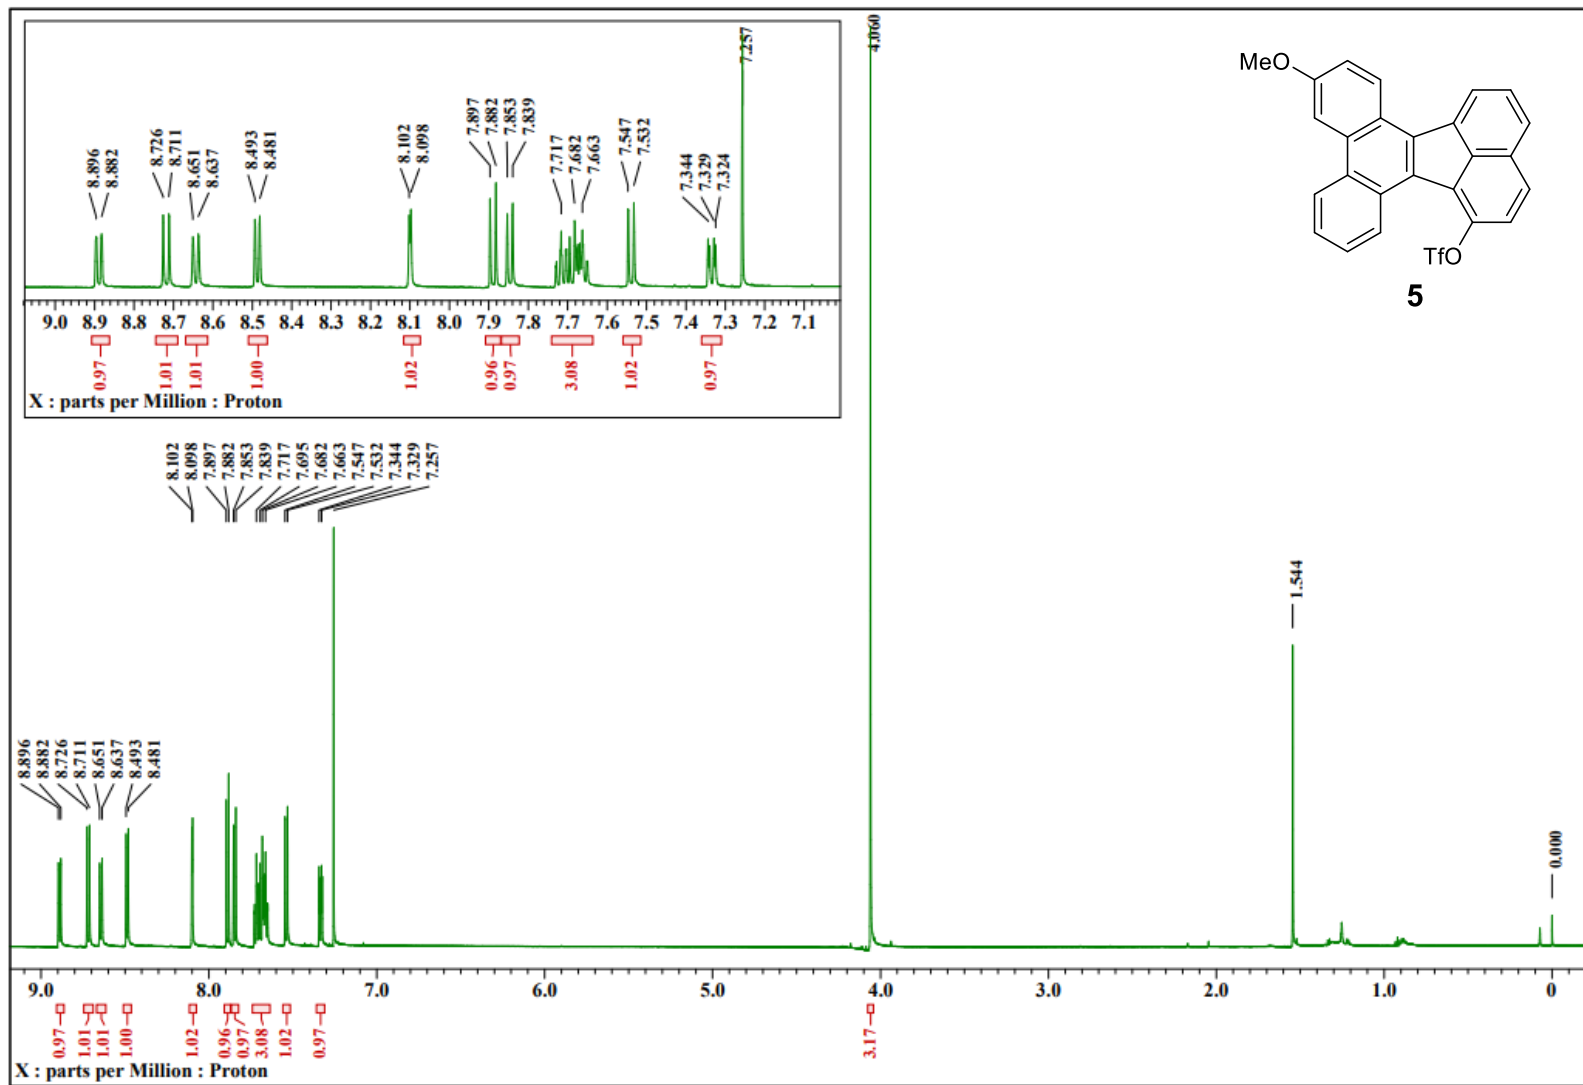

5: <sup>13</sup>C NMR, CDCl<sub>3</sub>, 151 MHz

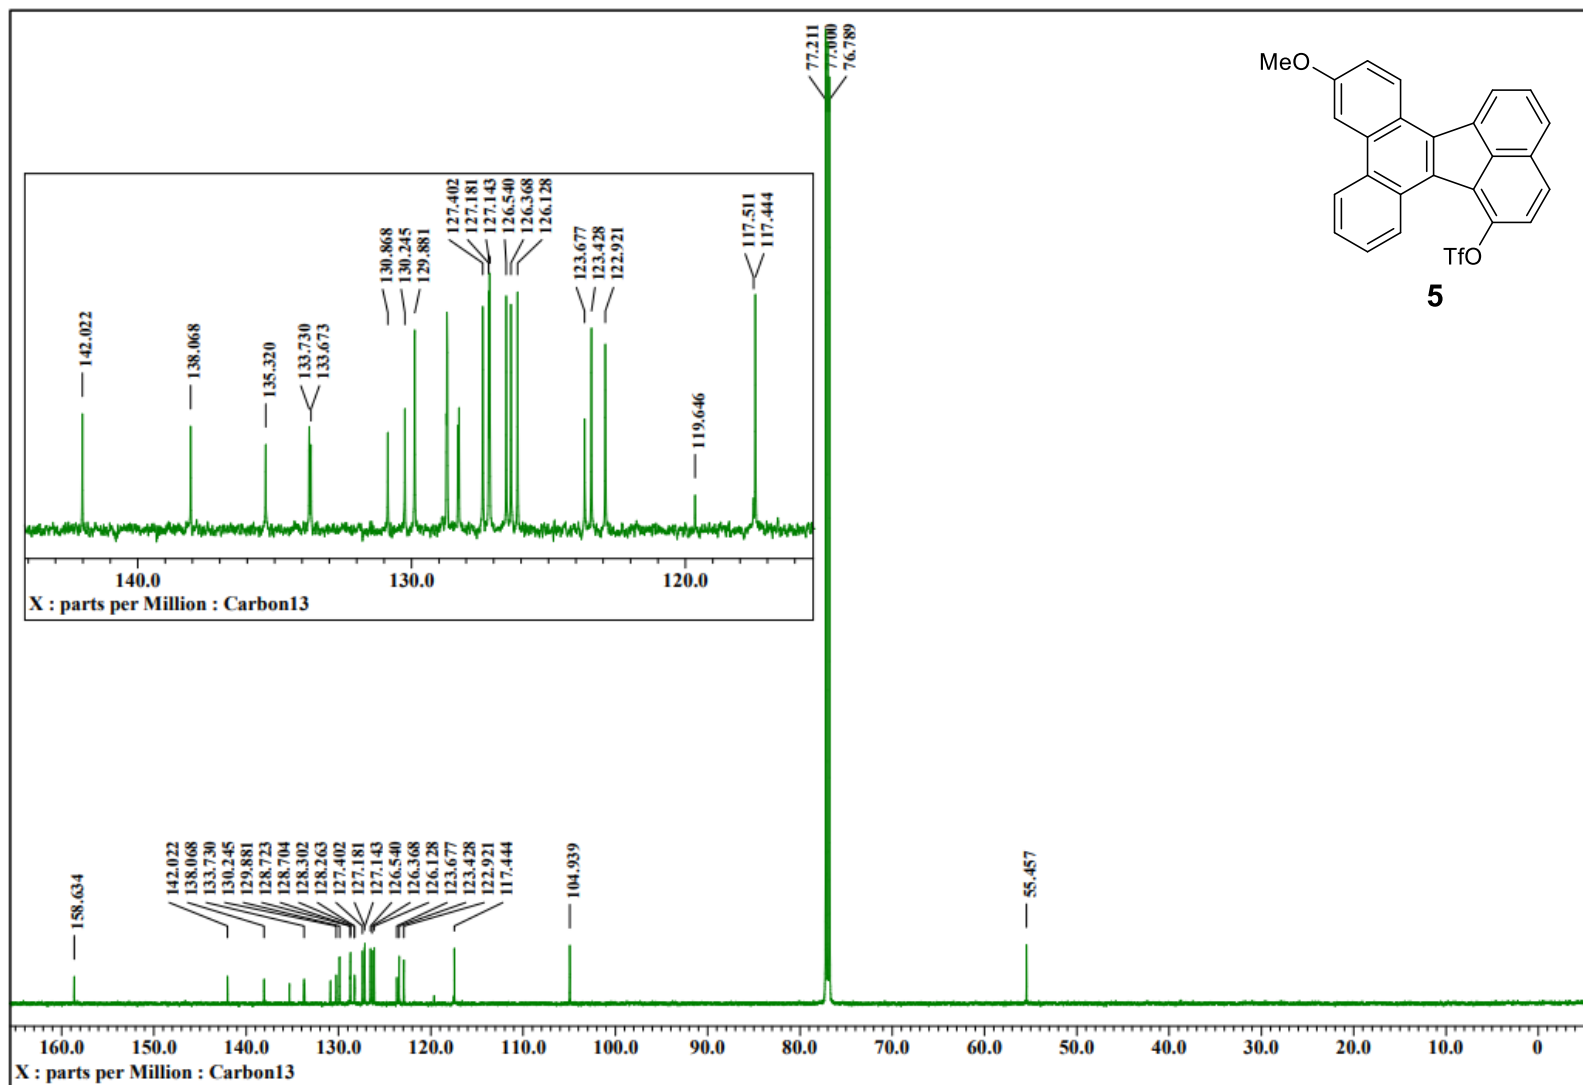



S3:  $^1\text{H}$  NMR,  $\text{CDCl}_3$ , 600 MHz

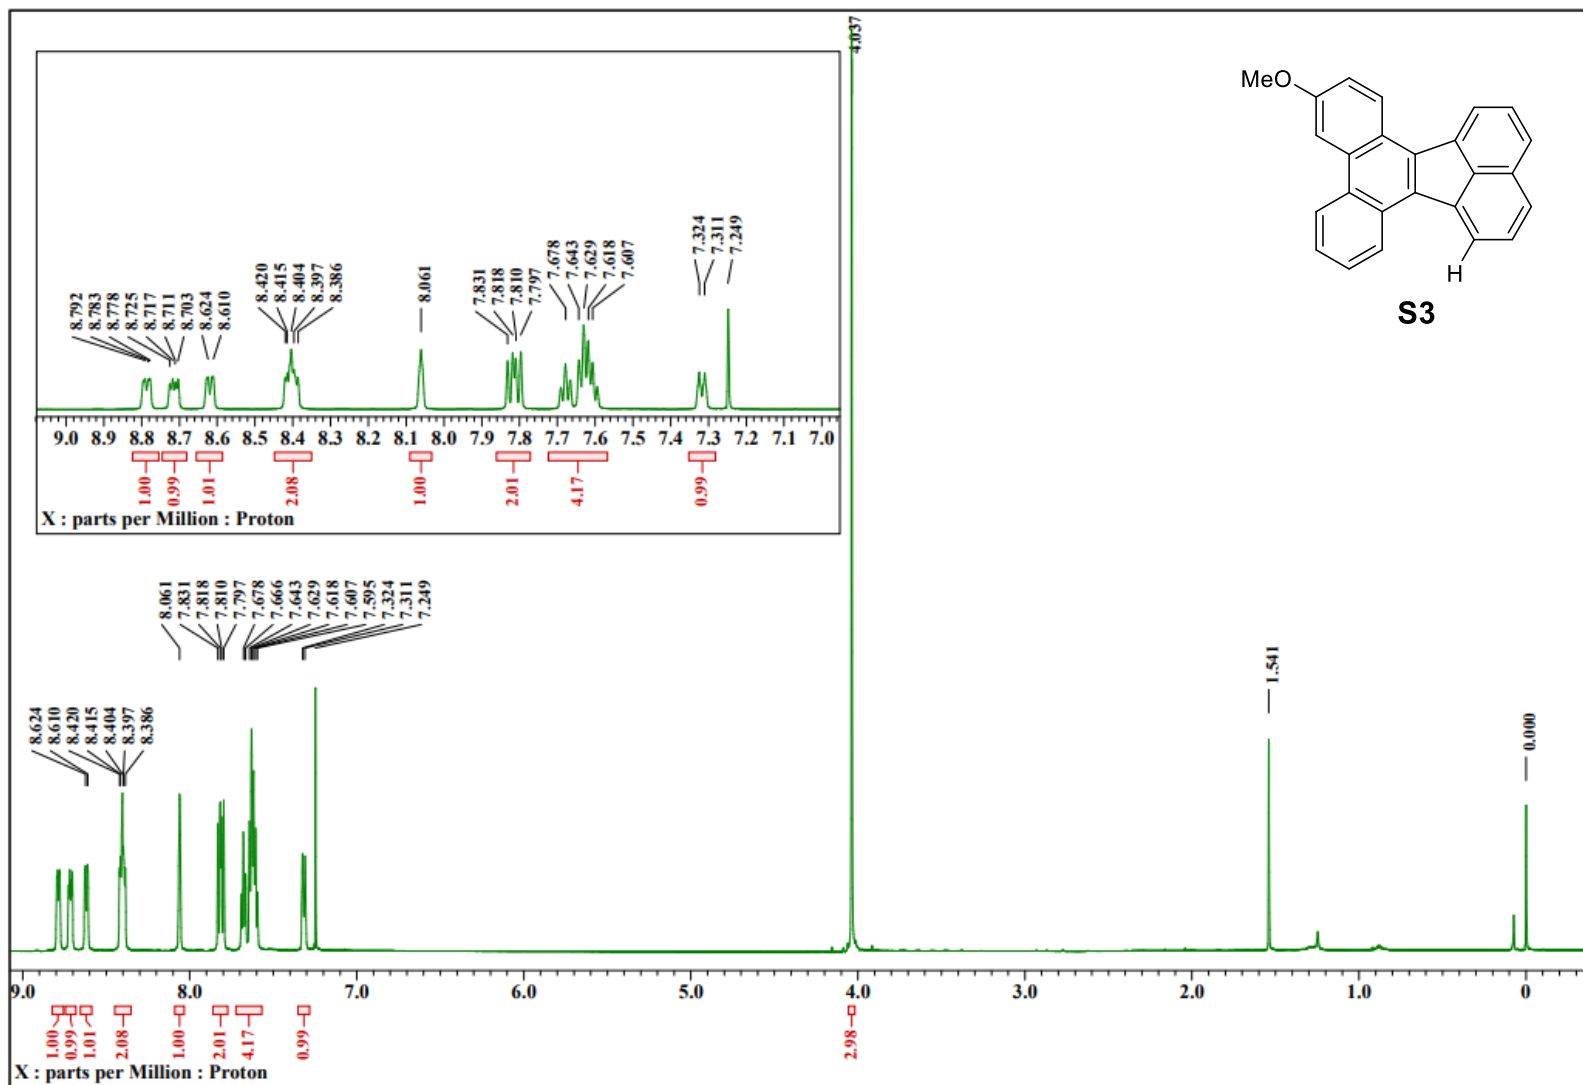

S3: <sup>13</sup>C NMR, CDCl<sub>3</sub>, 151 MHz

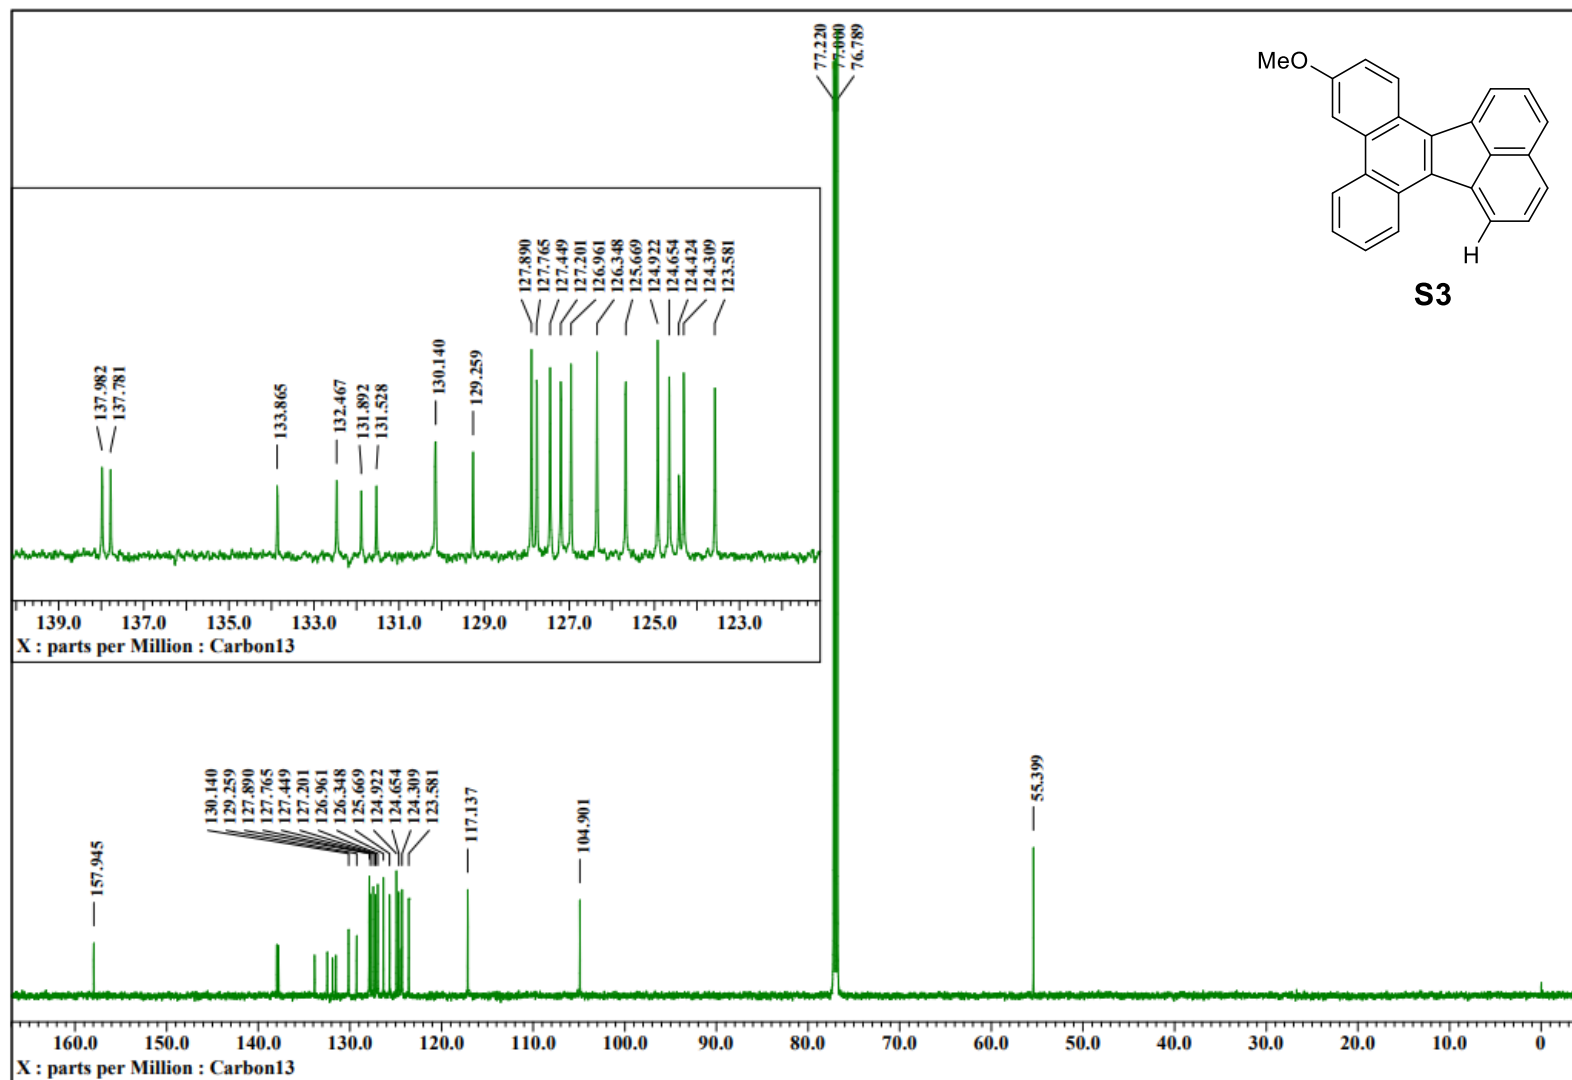

S82

3a: <sup>1</sup>H NMR, acetone-d<sub>6</sub>, 600 MHz

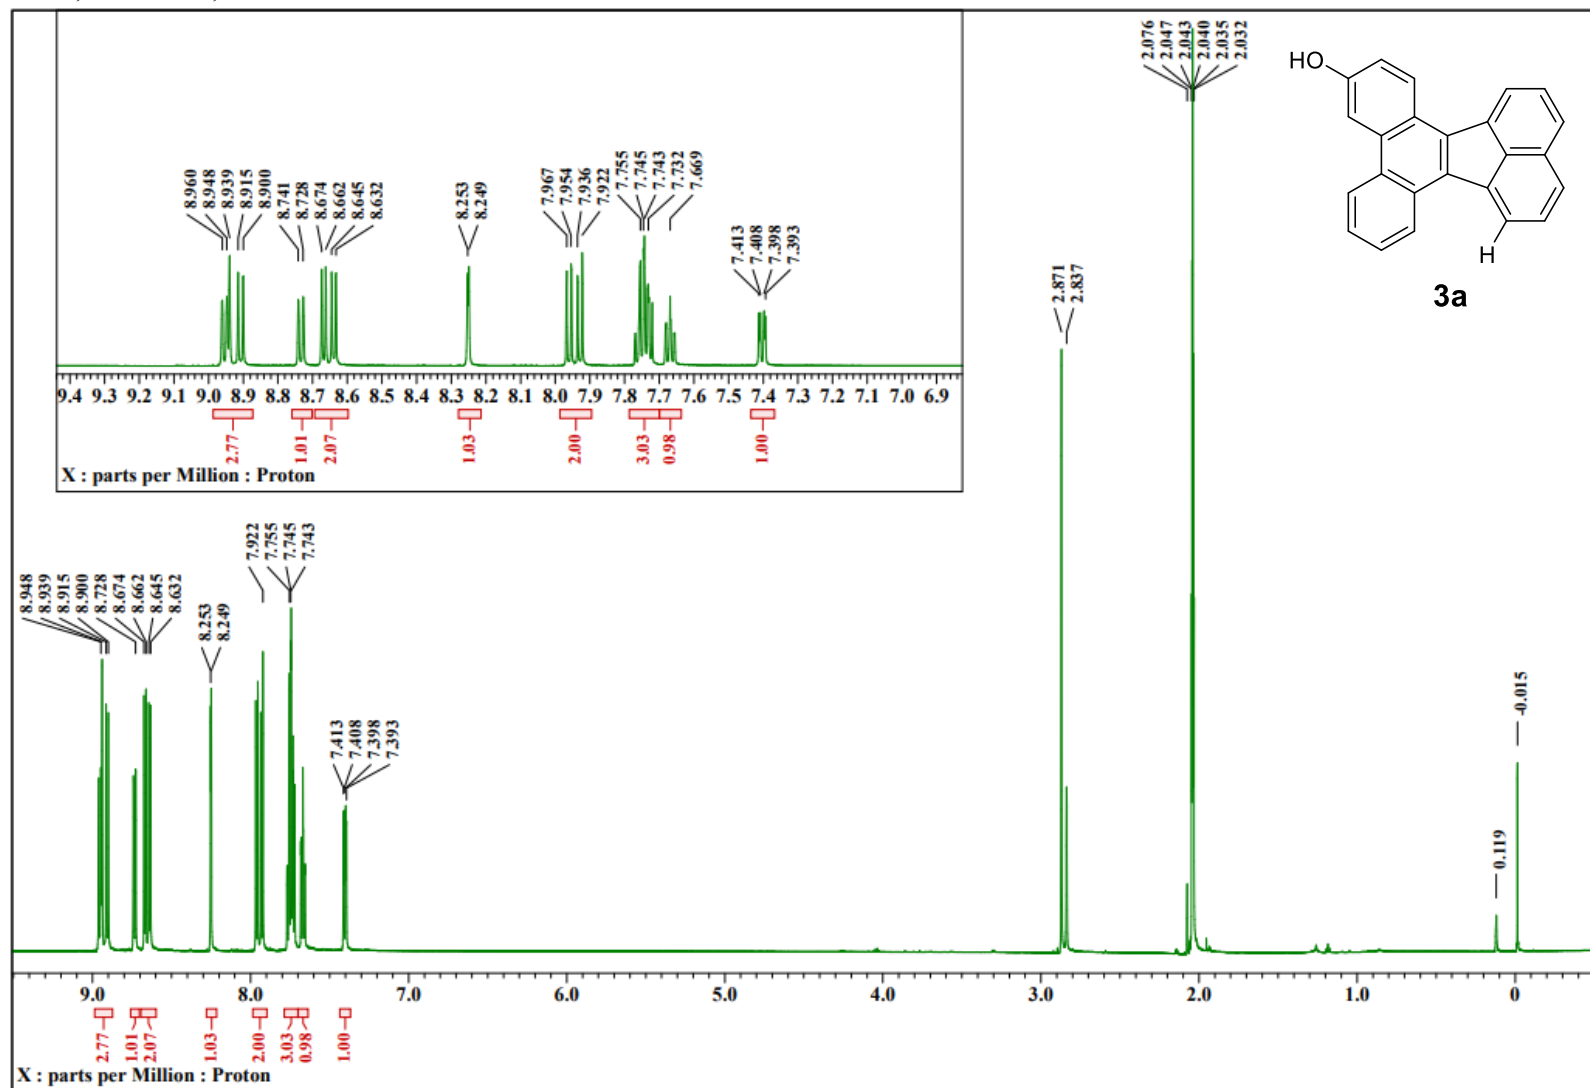

3a:  $^{13}\text{C}$  NMR, acetone- $d_6$ , 151 MHz

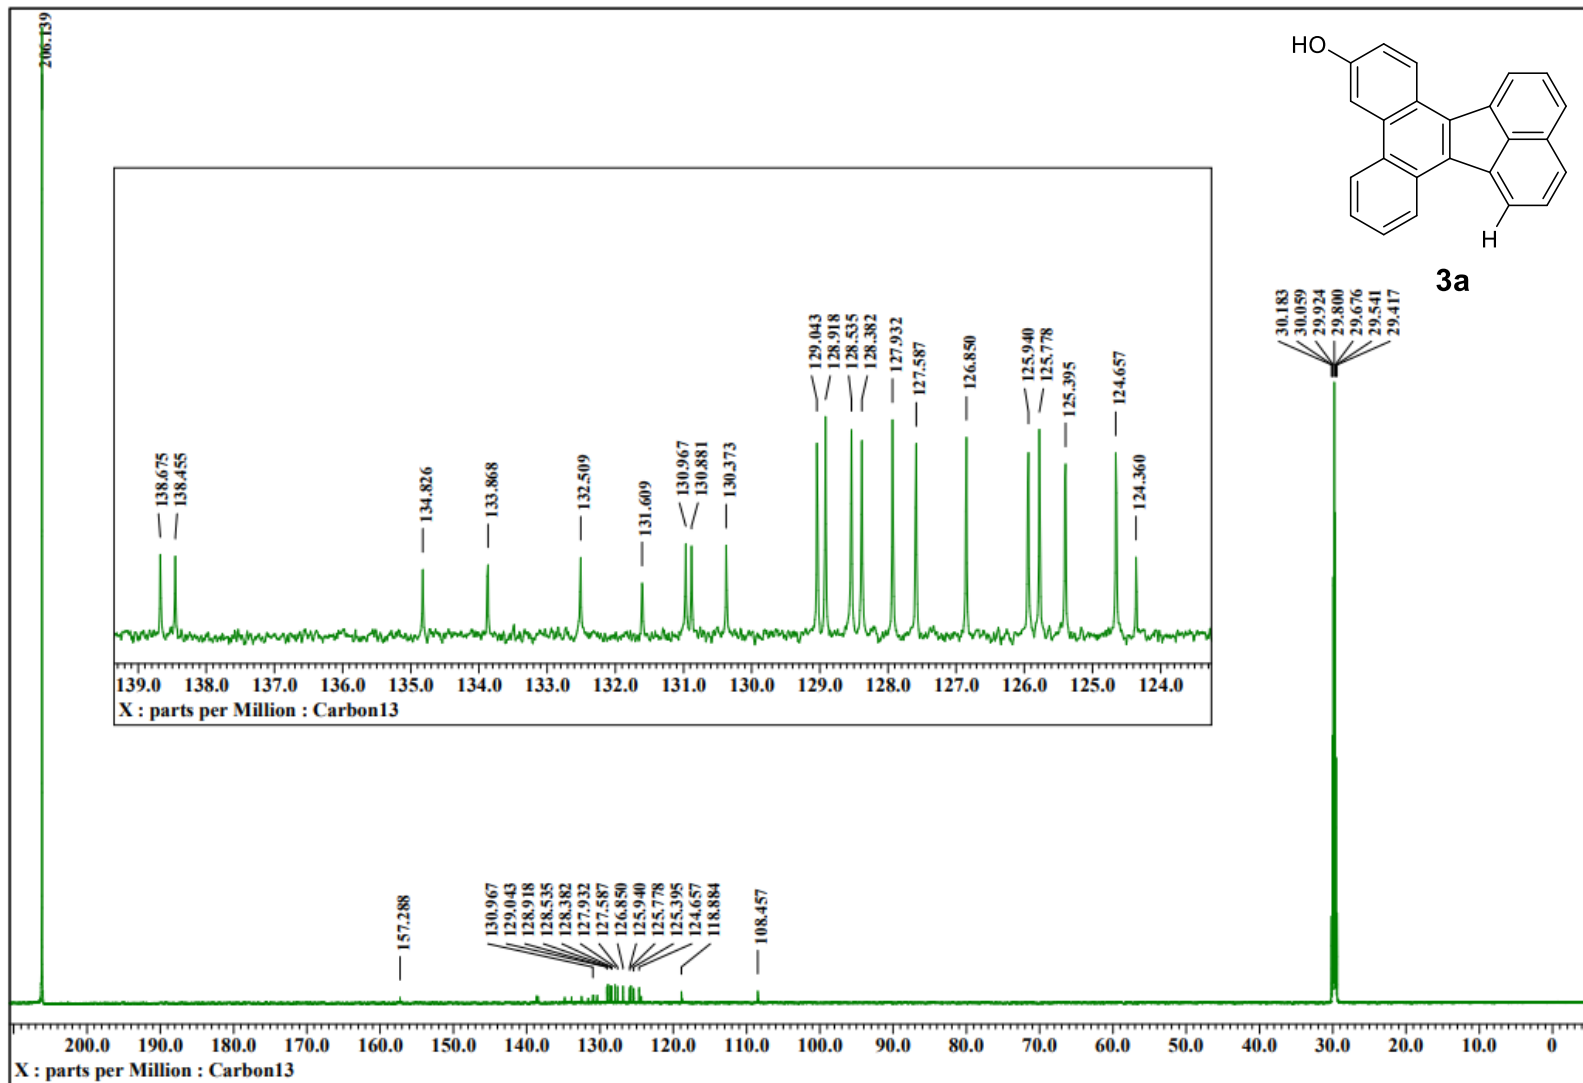

S4: <sup>1</sup>H NMR, DMSO-d<sub>6</sub>, 600 MHz

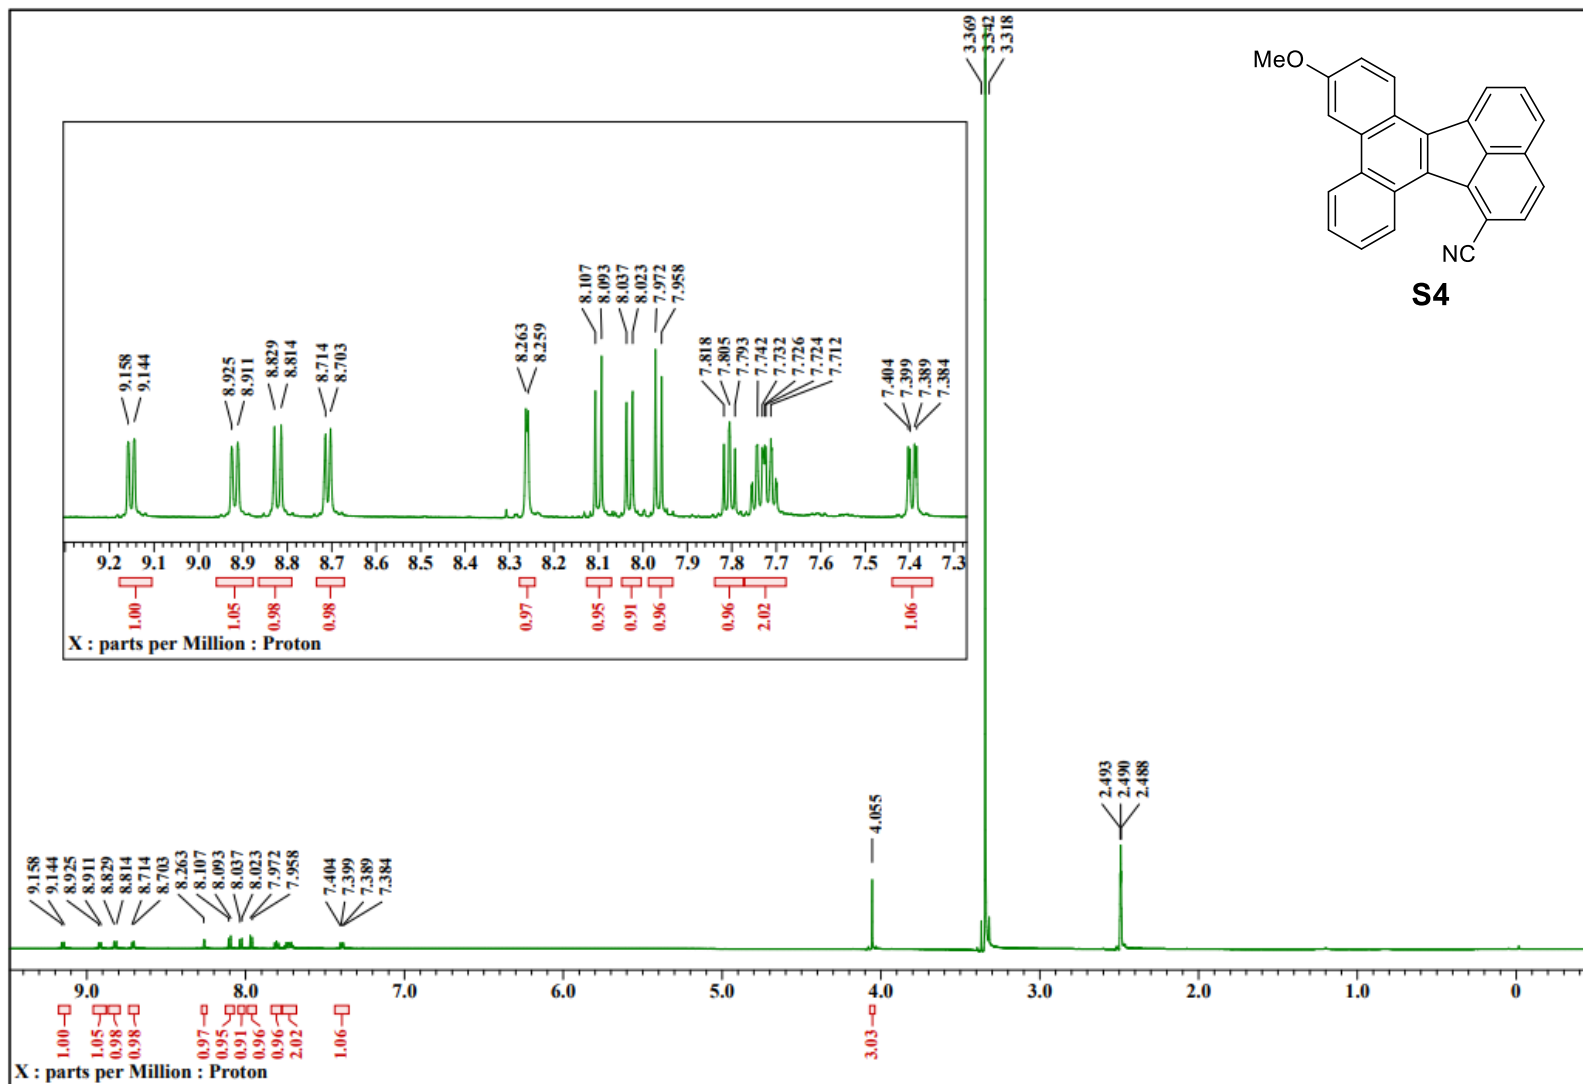

S85

S4: <sup>13</sup>C NMR, DMSO-d<sub>6</sub>, 151 MHz

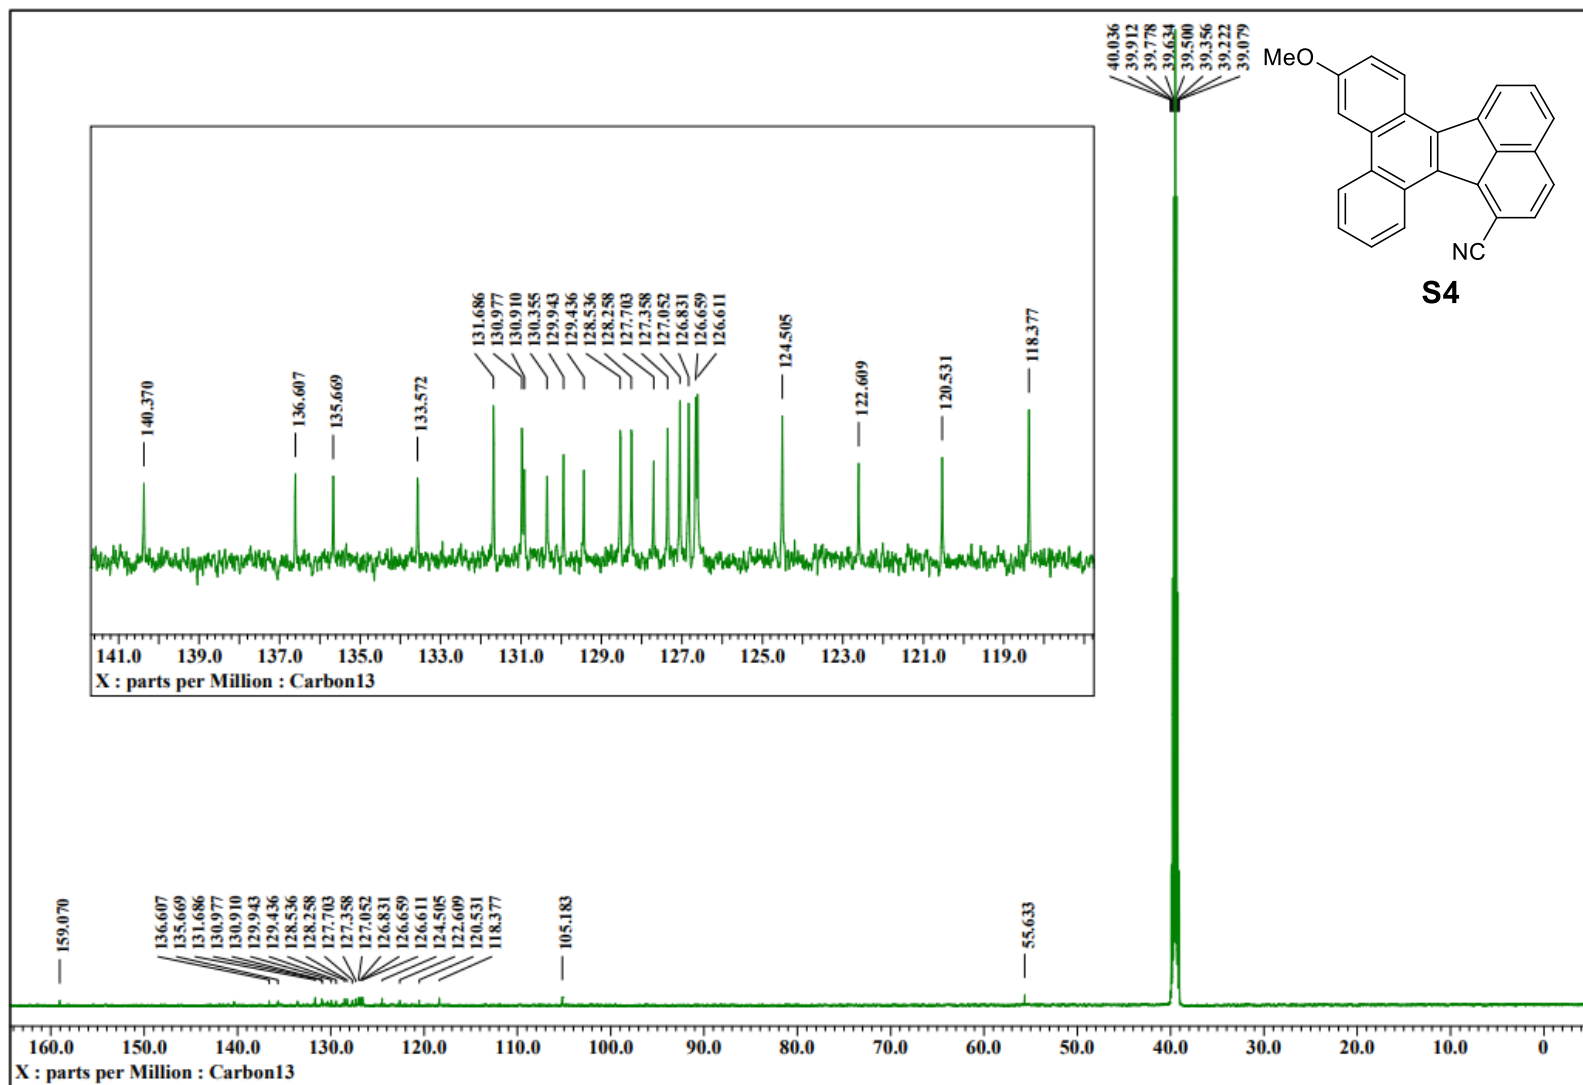

3c: <sup>1</sup>H NMR, DMSO-d<sub>6</sub>, 600 MHz

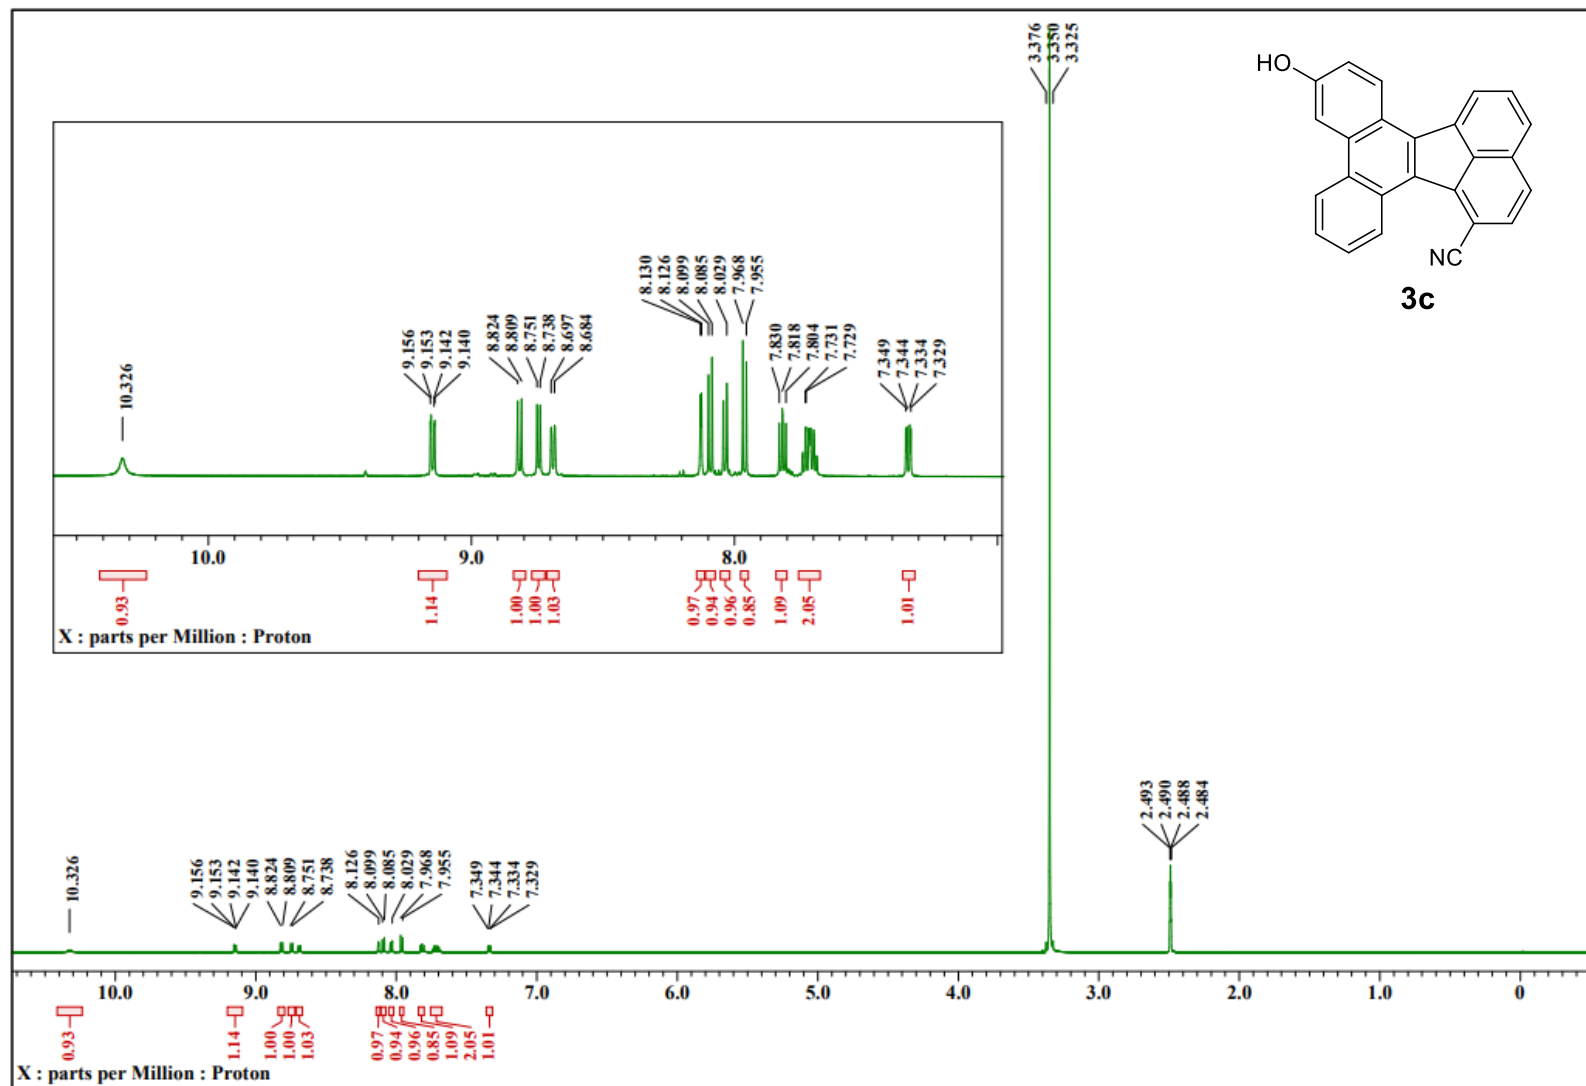

3c: <sup>13</sup>C NMR, DMSO-d<sub>6</sub>, 151 MHz

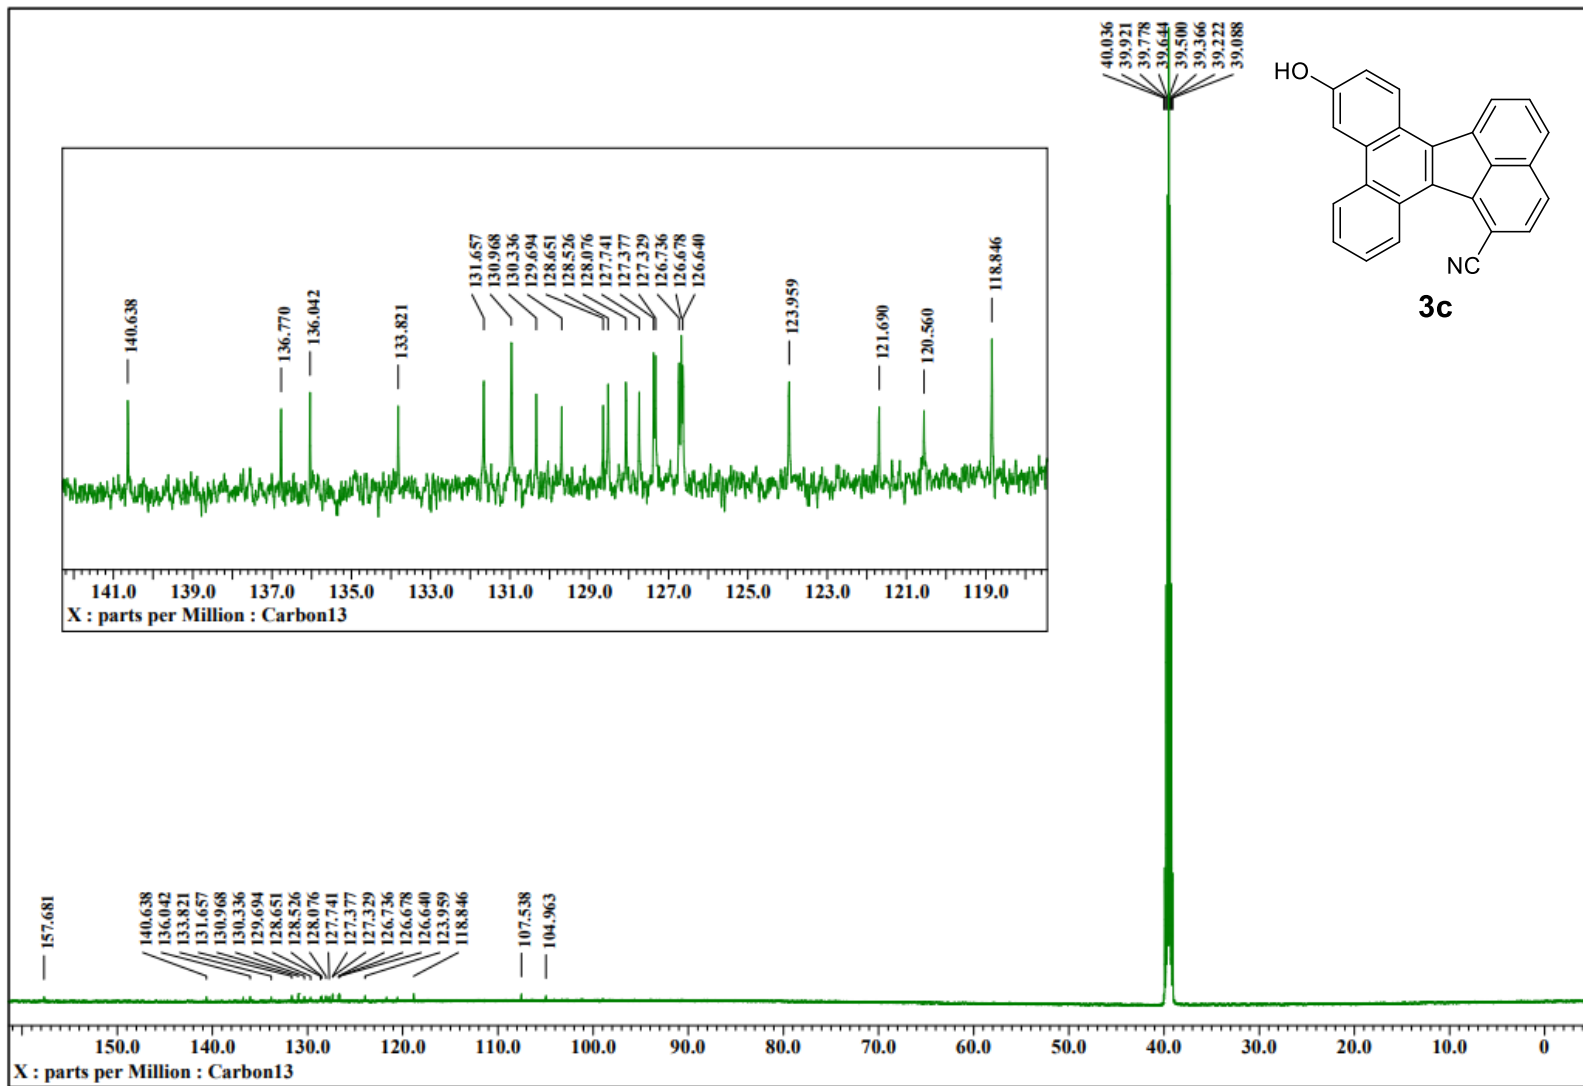



6:  $^1\text{H}$  NMR, DMSO- $d_6$ , 600 MHz

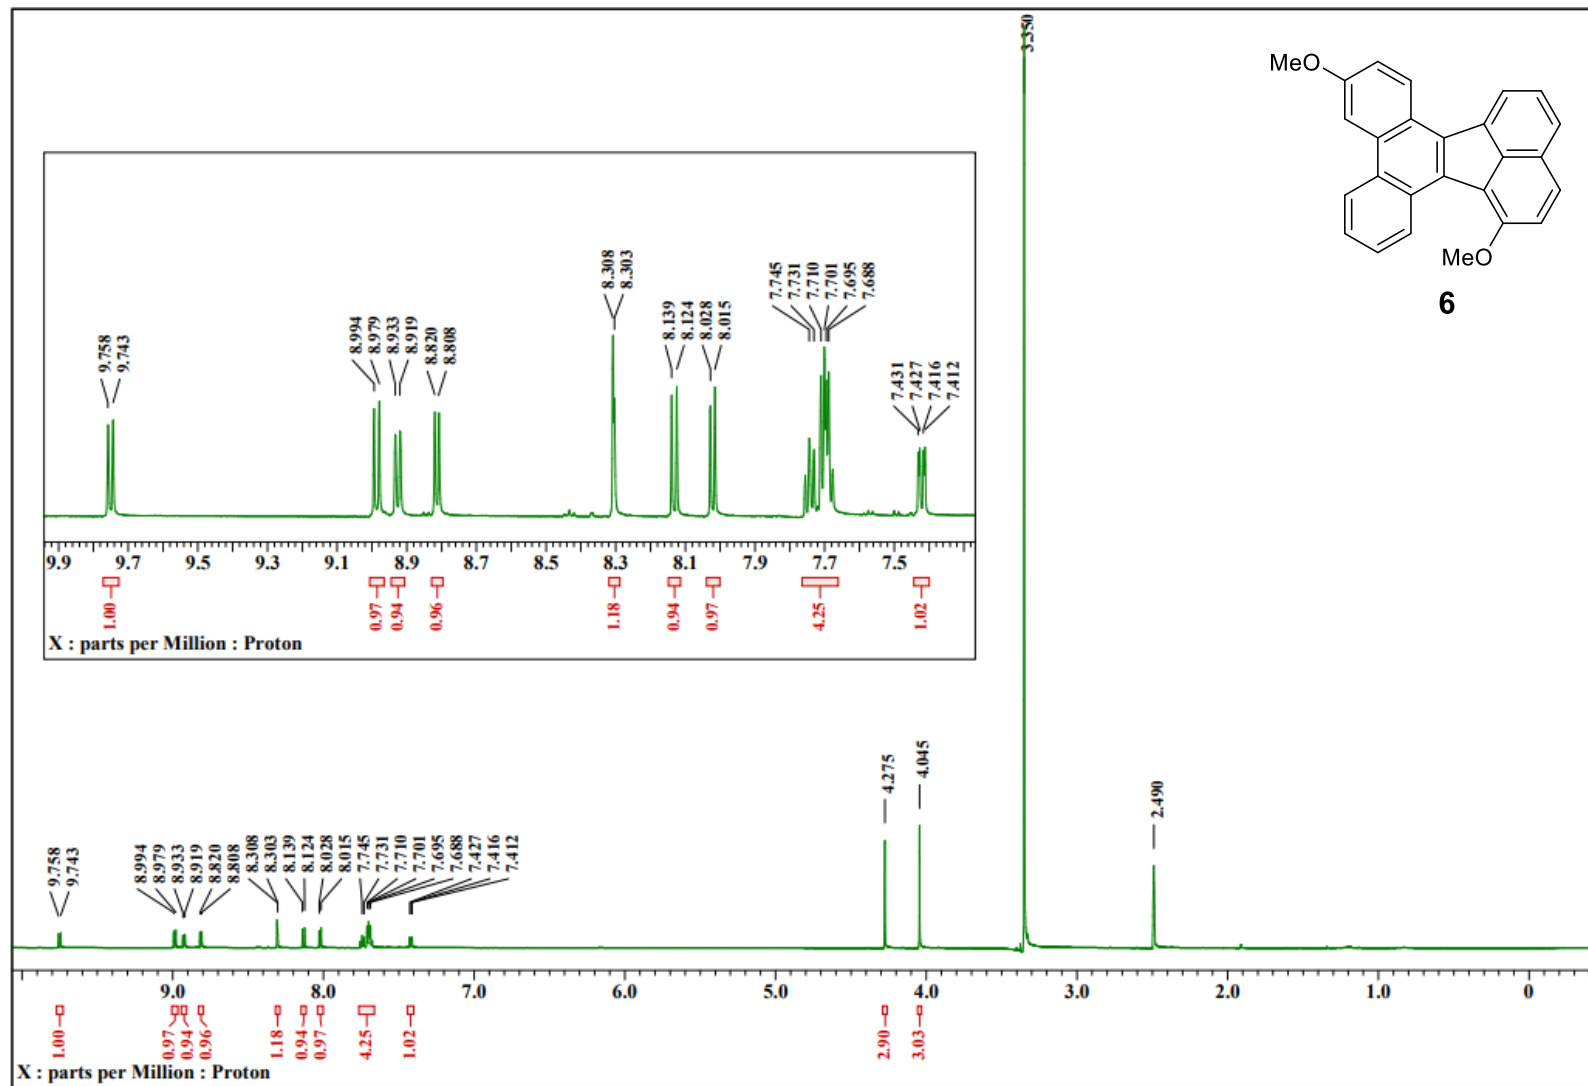

6:  $^{13}\text{C}$  NMR, DMSO-d<sub>6</sub>, 151 MHz

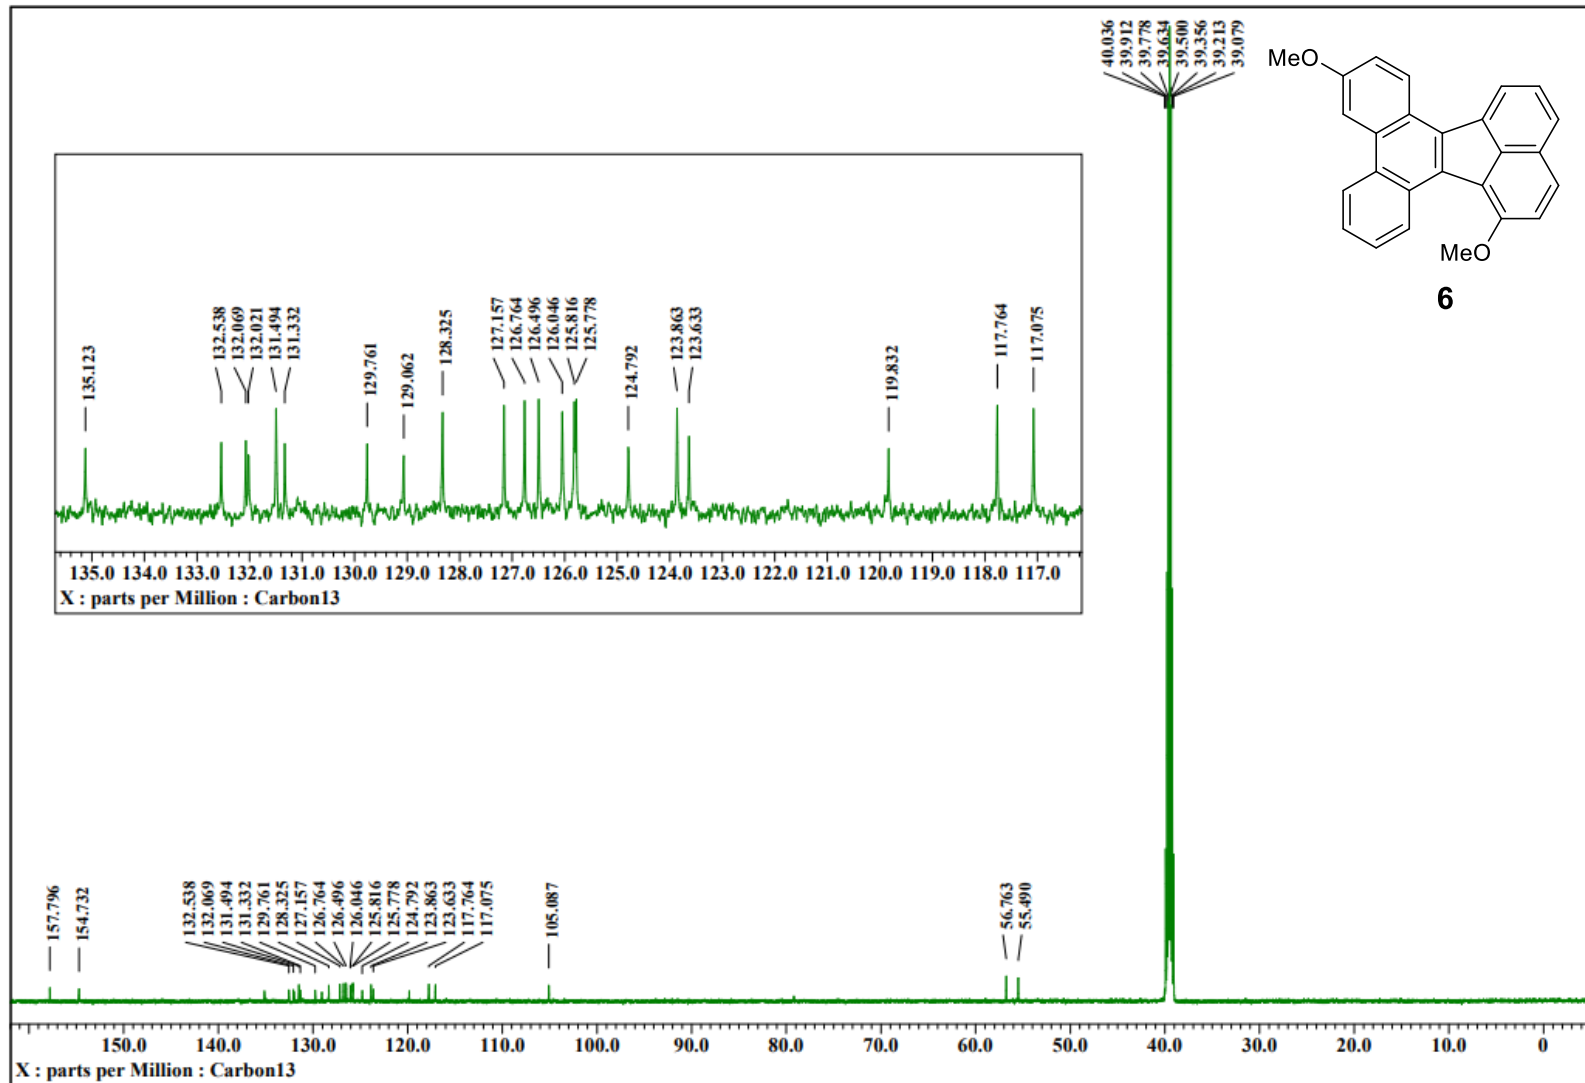

3b: <sup>1</sup>H NMR, CDCl<sub>3</sub>, 600 MHz

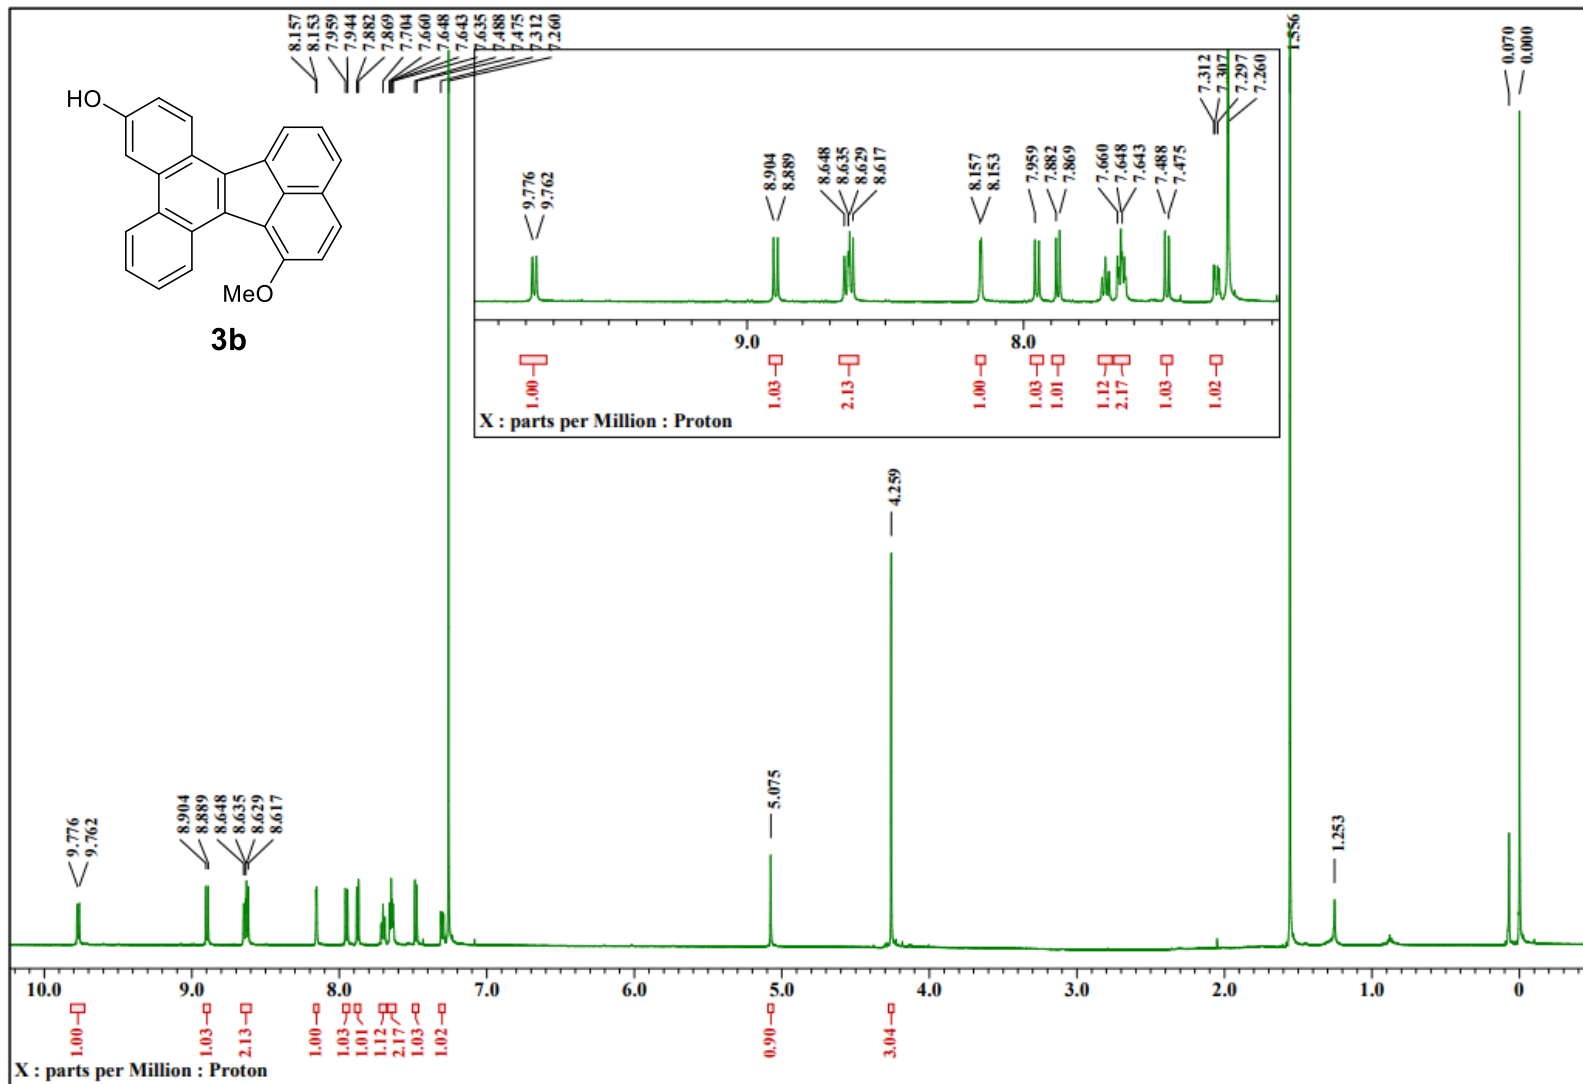

**3b**:  $^{13}\text{C}$  NMR,  $\text{CDCl}_3$ , 151 MHz

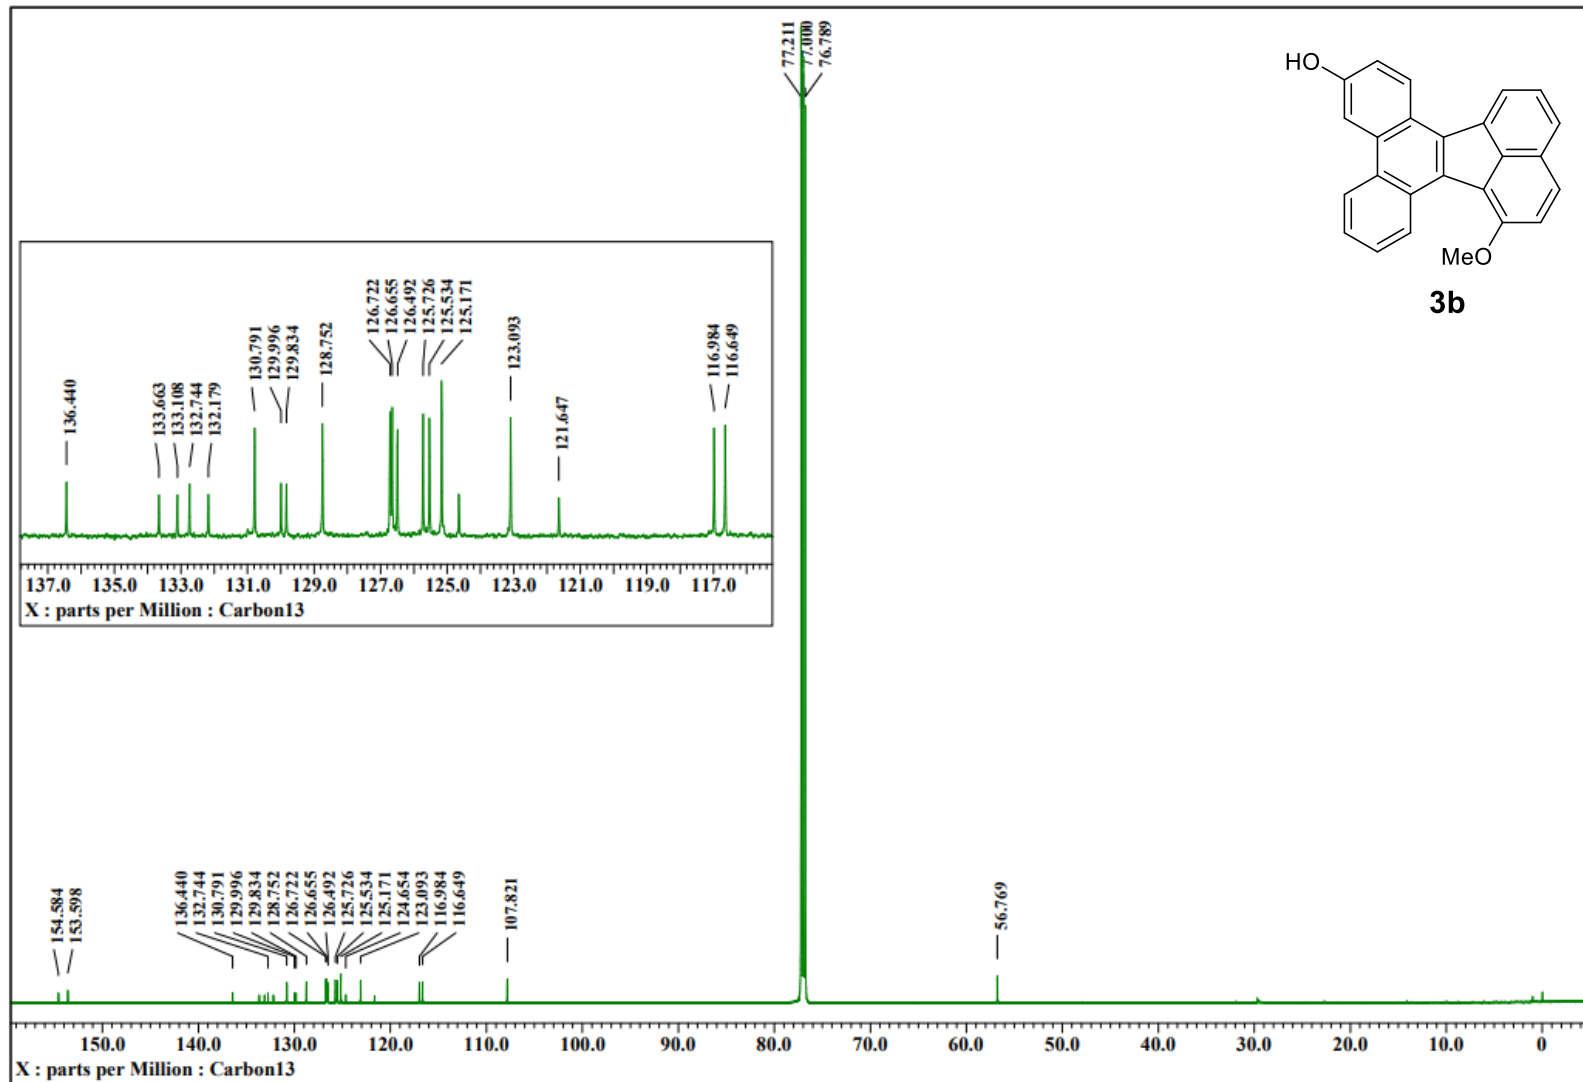

7: <sup>1</sup>H NMR, DMSO-d<sub>6</sub>, 600 MHz

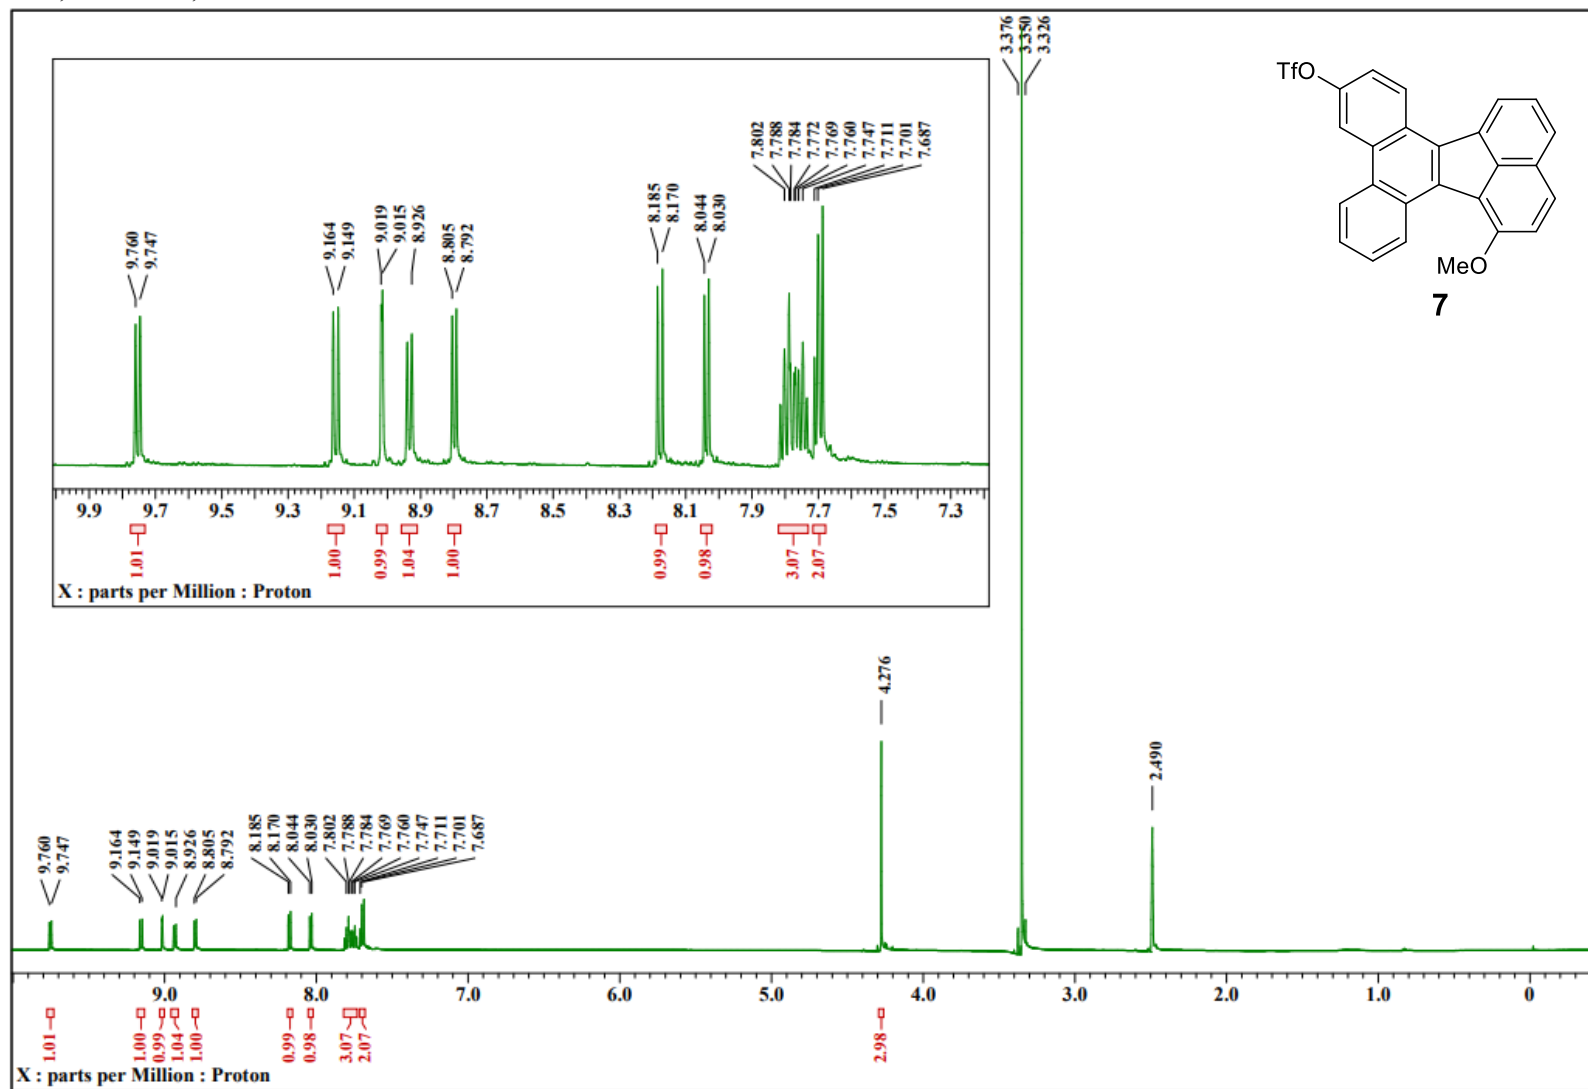

7: <sup>13</sup>C NMR, DMSO-d<sub>6</sub>, 151 MHz

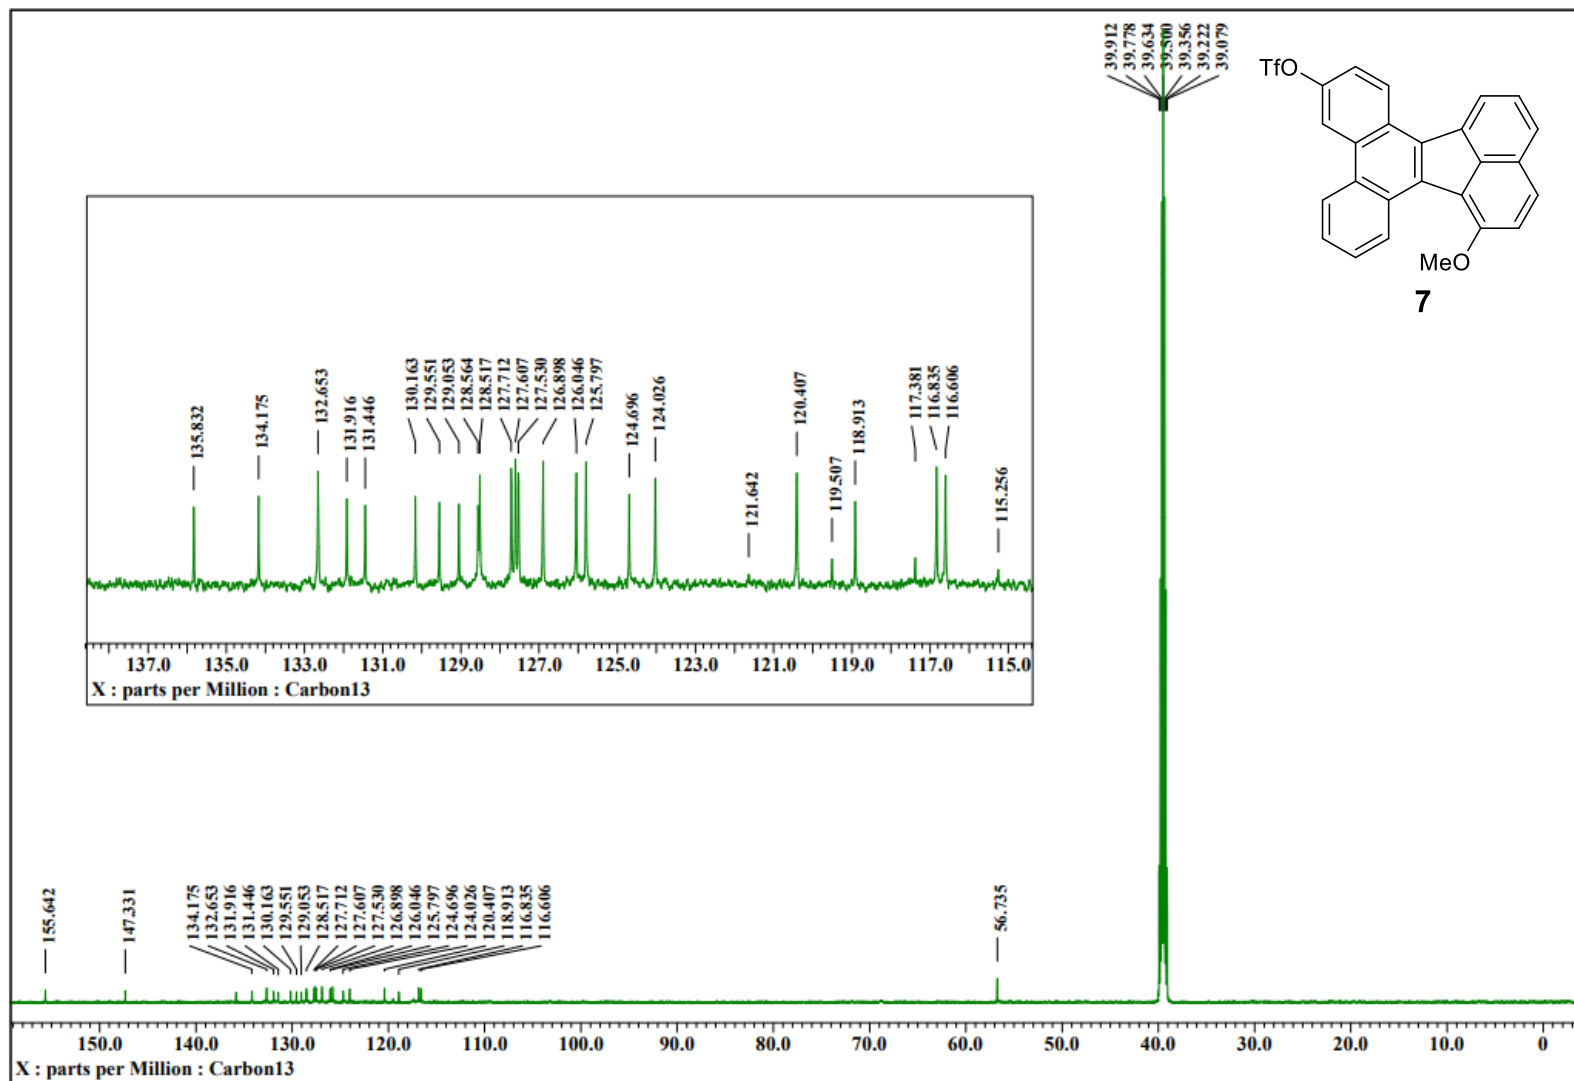

S5: <sup>1</sup>H NMR, DMSO-d<sub>6</sub>, 600 MHz

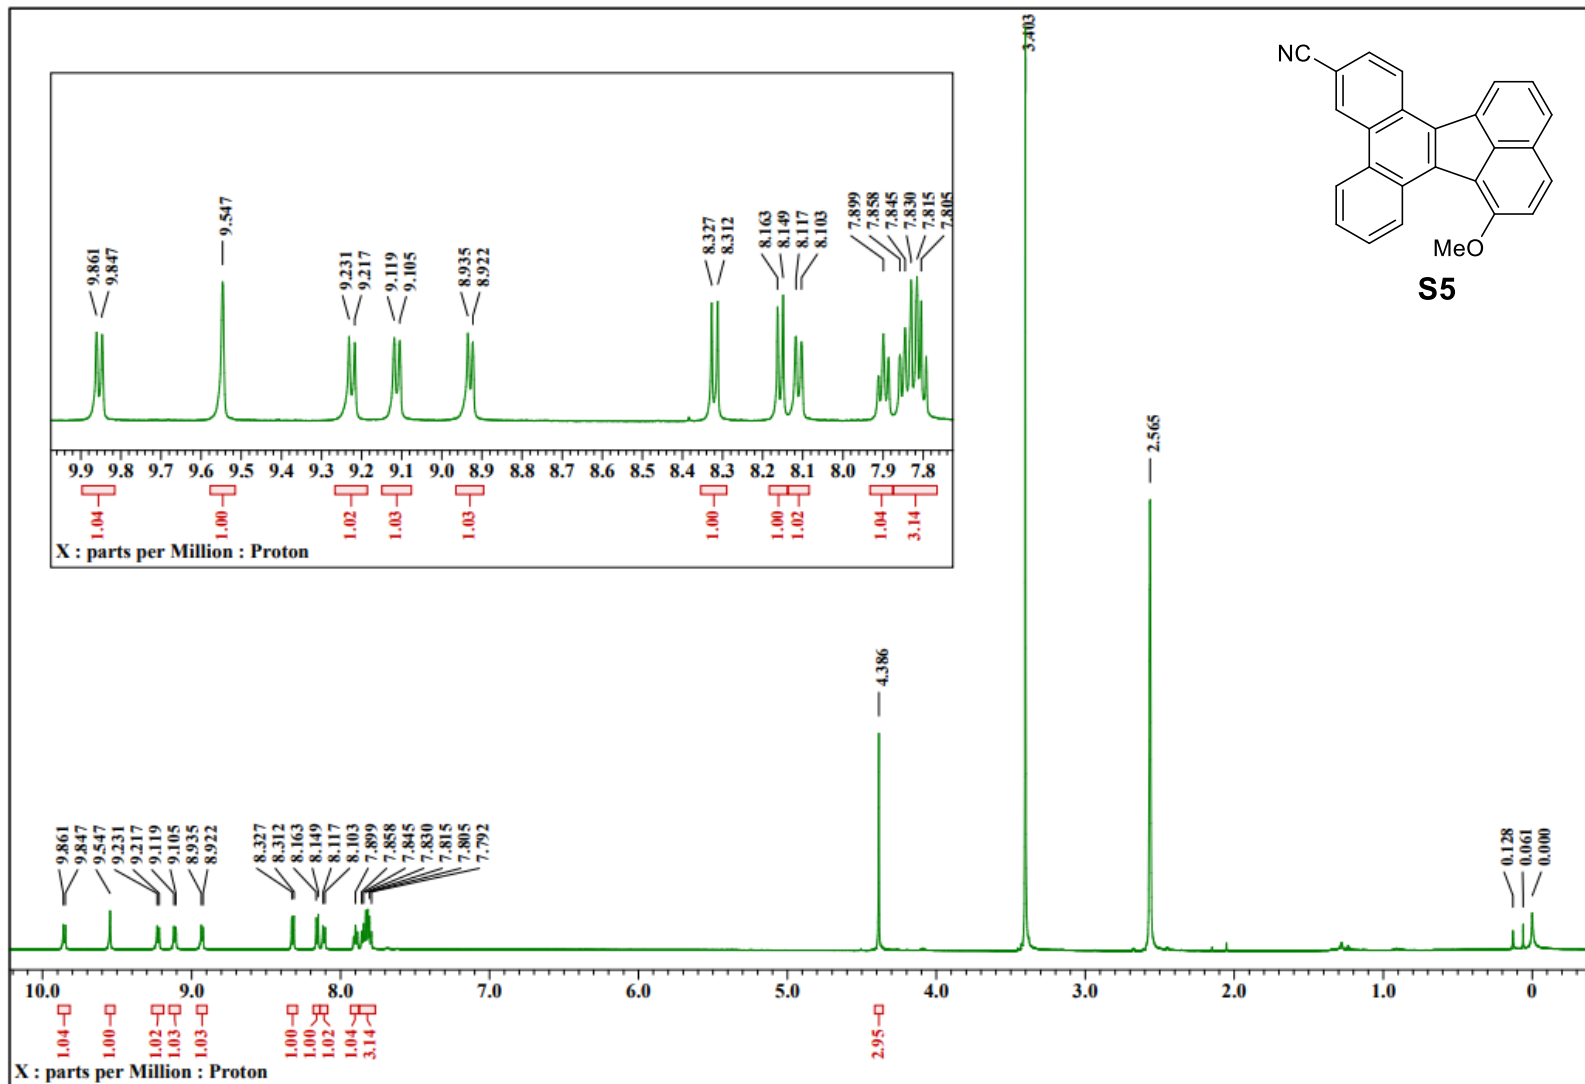

S5:  $^{13}\text{C}$  NMR, DMSO-d<sub>6</sub>, 151 MHz

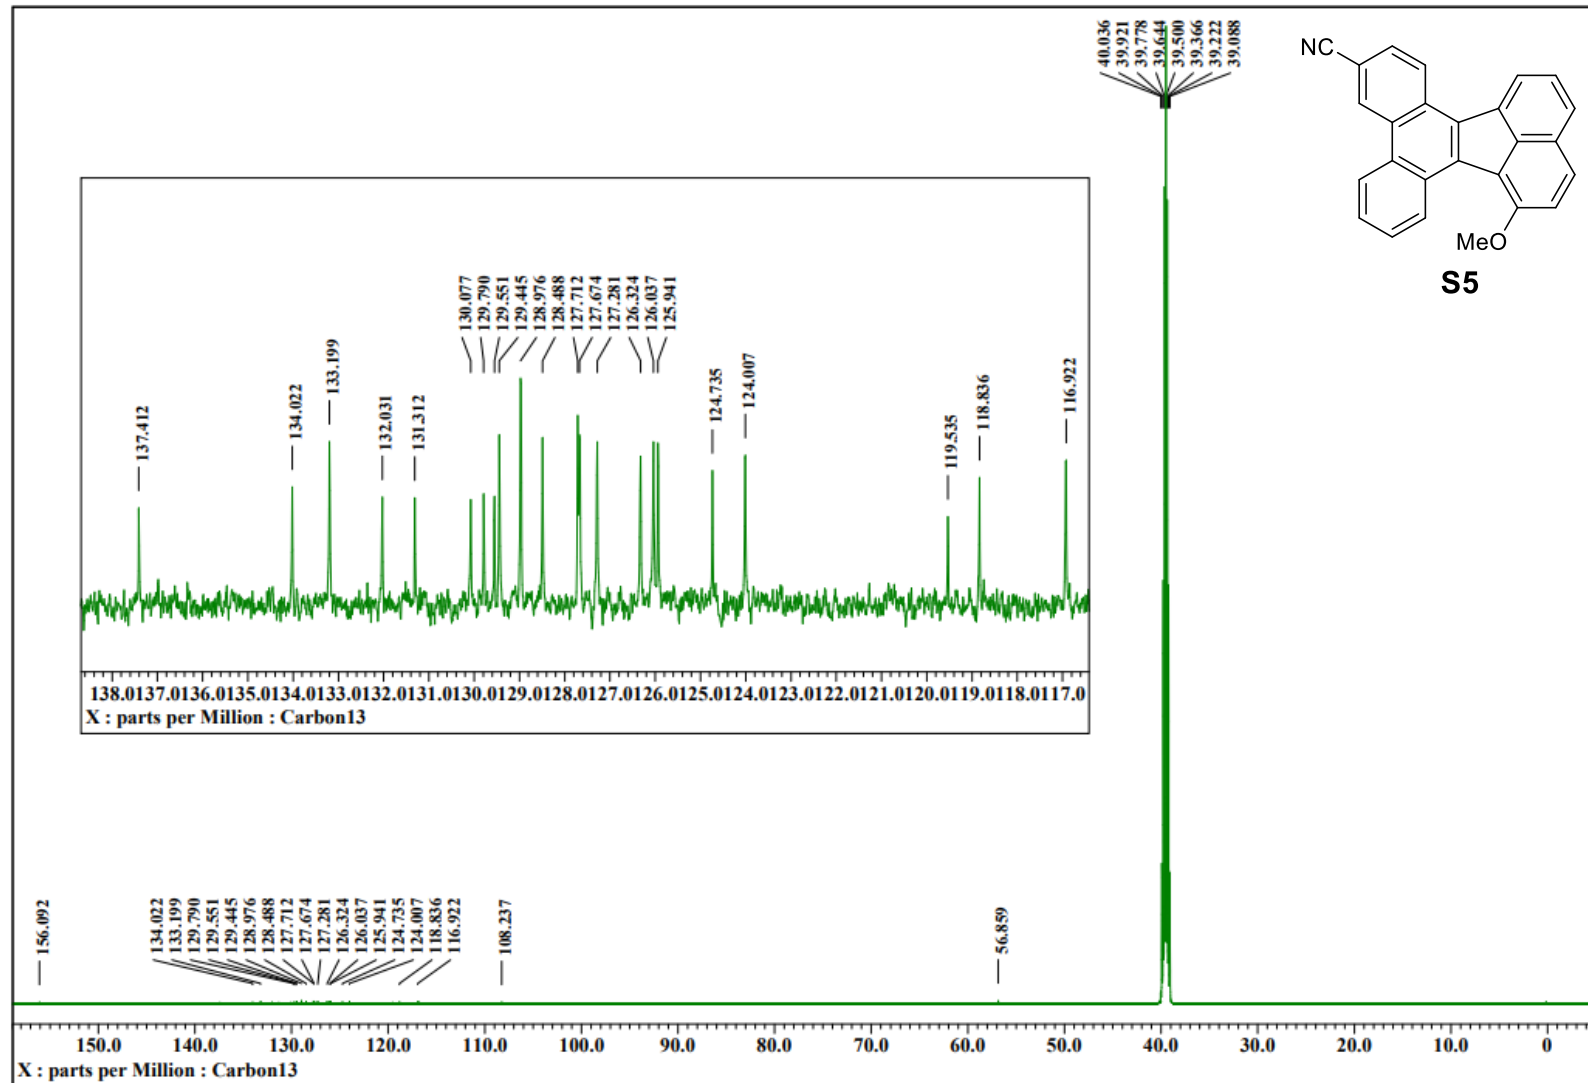



2c: <sup>1</sup>H NMR, DMSO-d<sub>6</sub>, 600 MHz

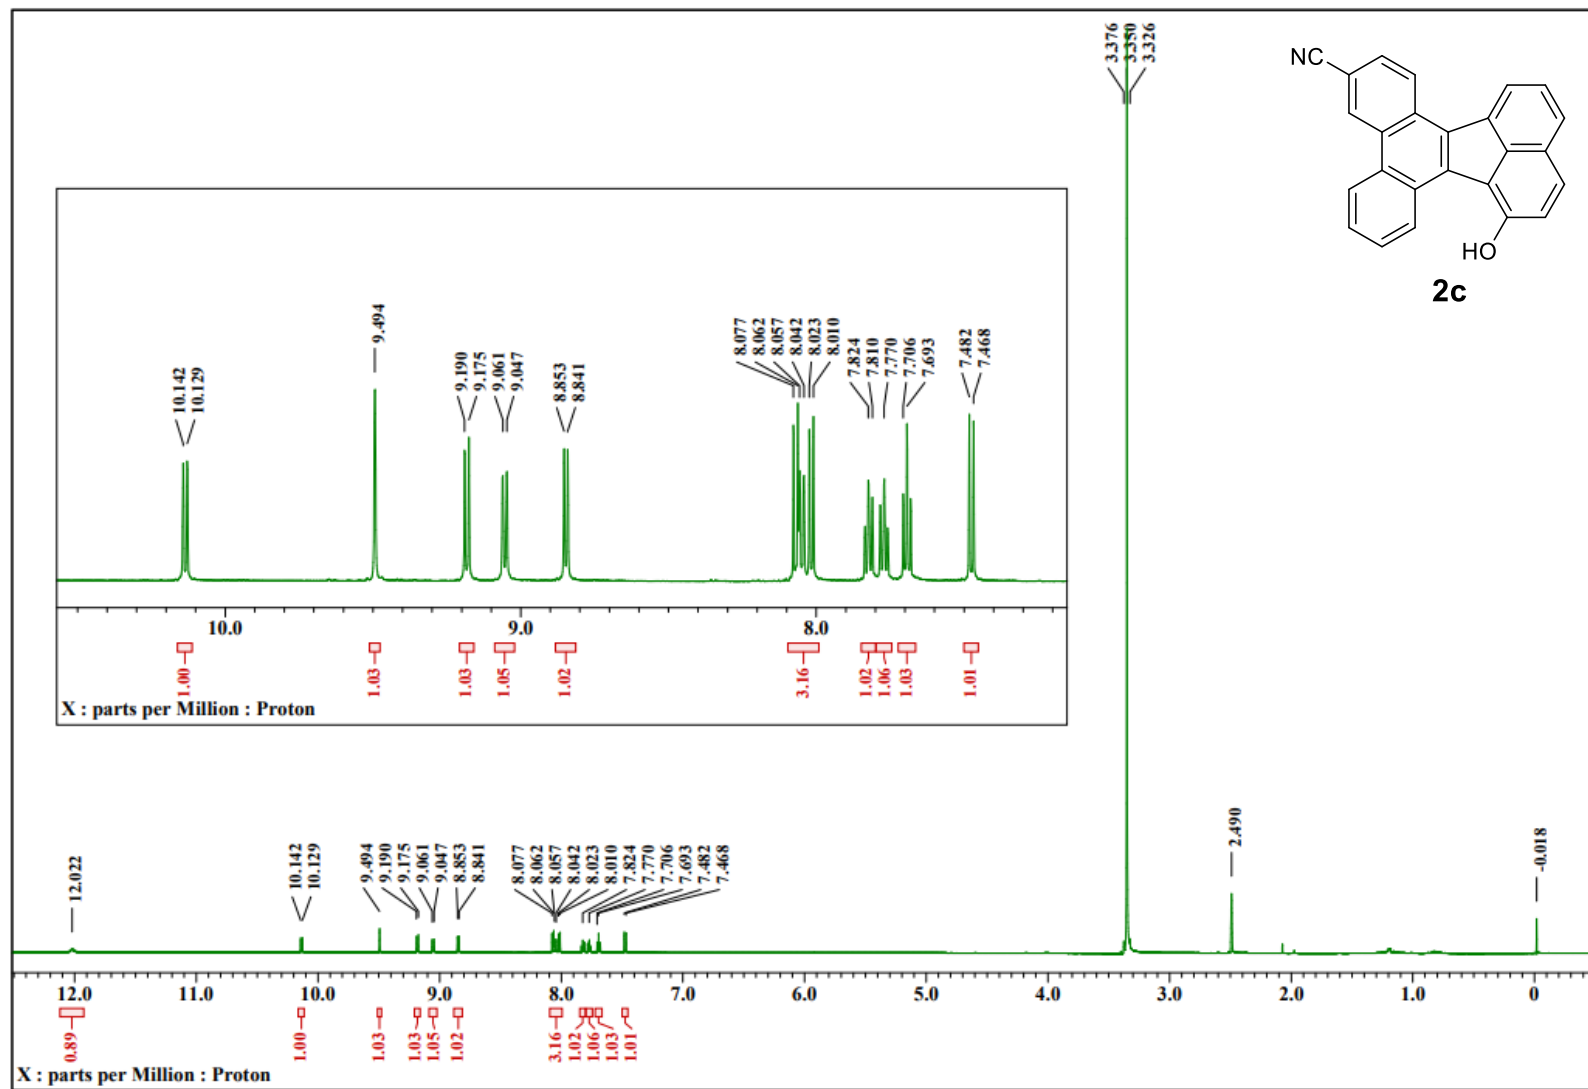

2c: <sup>13</sup>C NMR, DMSO-d<sub>6</sub>, 151 MHz

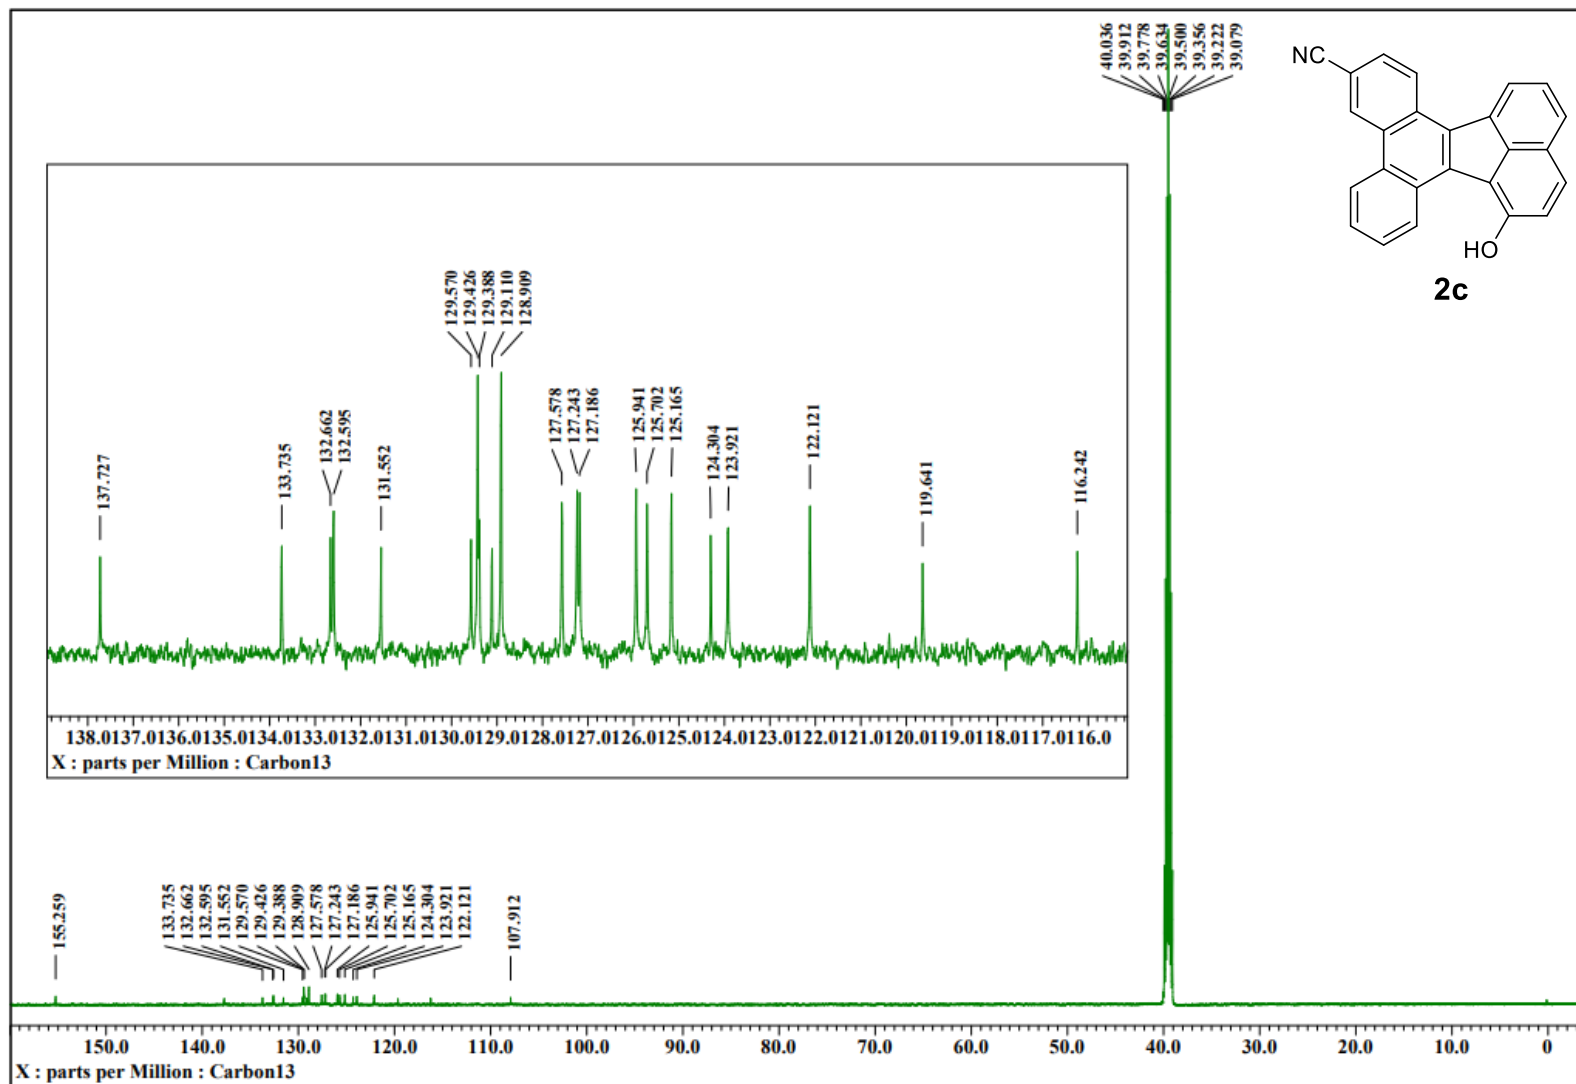

4: <sup>1</sup>H NMR, CDCl<sub>3</sub>, 600 MHz

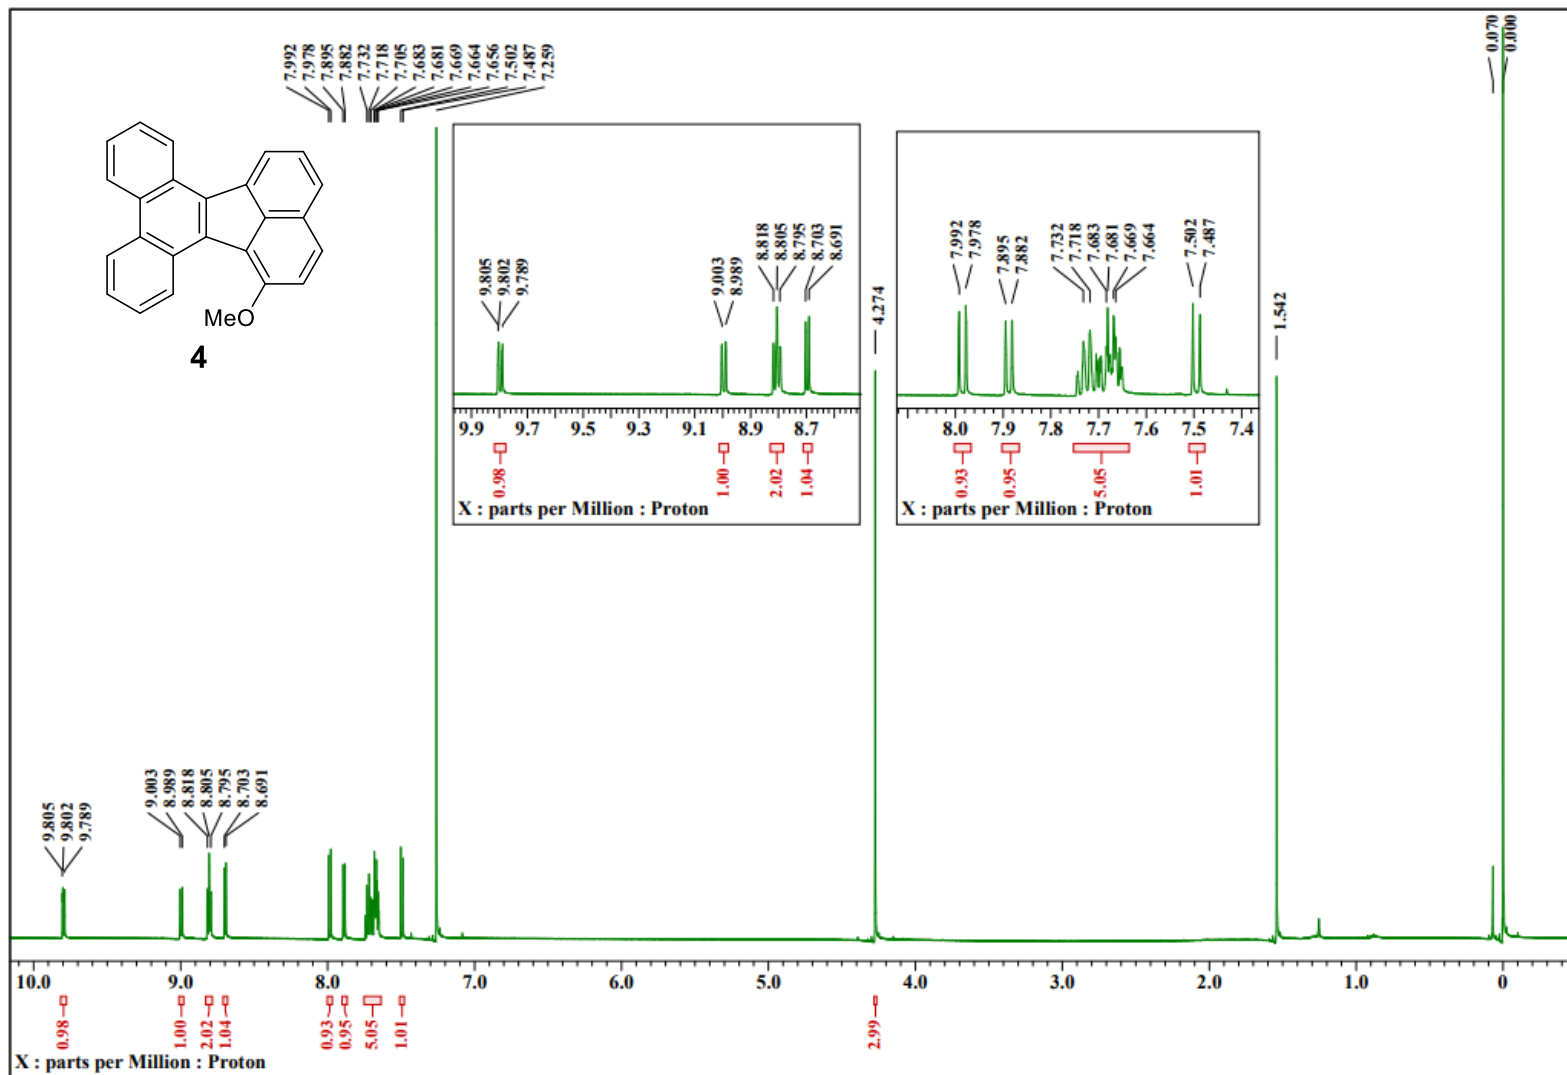

4:  $^{13}\text{C}$  NMR,  $\text{CDCl}_3$ , 151 MHz

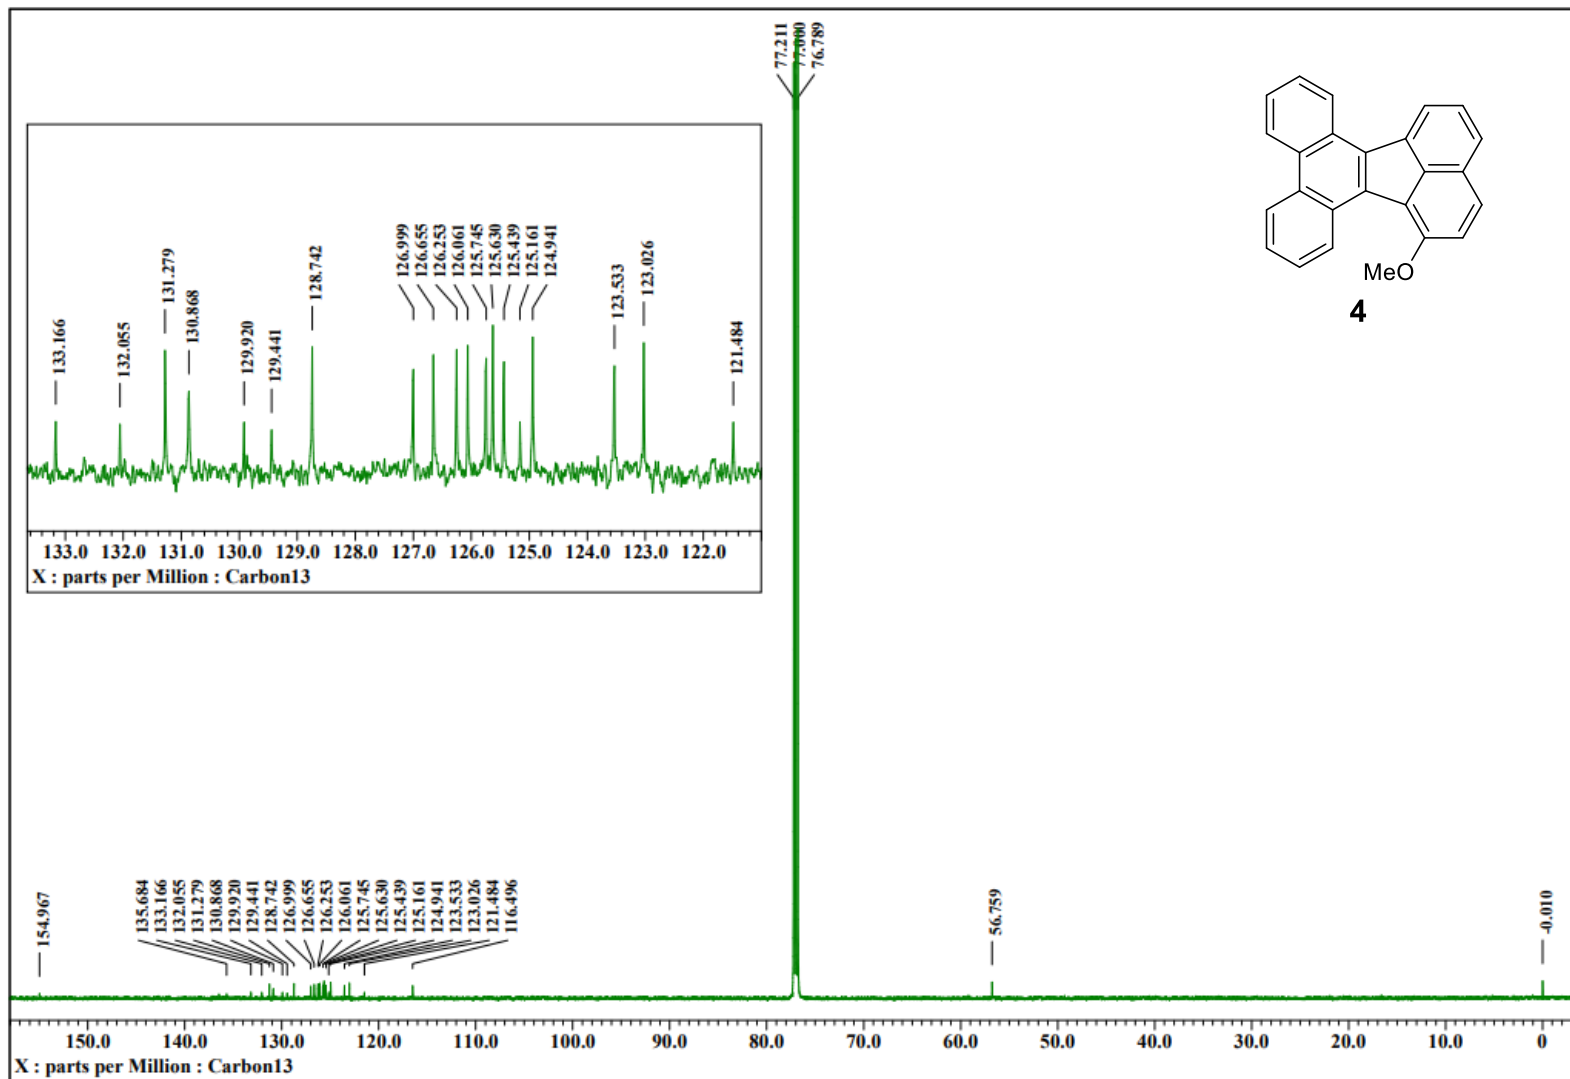

## 8. References

1. N. Ogawa, Y. Yamaoka, K. Yamada and K. Takasu, *Org. Lett.*, 2017, **19**, 3327–3330.
2. T. Scattolin, E. Senol, G. Yin, Q. Guo and F. Schoenebeck, *Angew. Chem. Int. Ed.*, 2018, **57**, 12425–12429.
3. J. Kruszewski and T. M. Krygowski, *Tetrahedron Lett.*, 1972, **13**, 3839–3842.
4. Gaussian 16, Revision C.01, M. J. Frisch, G. W. Trucks, H. B. Schlegel, G. E. Scuseria, M. A. Robb, J. R. Cheeseman, G. Scalmani, V. Barone, G. A. Petersson, H. Nakatsuji, X. Li, M. Caricato, A. V. Marenich, J. Bloino, B. G. Janesko, R. Gomperts, B. Mennucci, H. P. Hratchian, J. V. Ortiz, A. F. Izmaylov, J. L. Sonnenberg, D. Williams-Young, F. Ding, F. Lipparini, F. Egidi, J. Goings, B. Peng, A. Petrone, T. Henderson, D. Ranasinghe, V. G. Zakrzewski, J. Gao, N. Rega, G. Zheng, W. Liang, M. Hada, M. Ehara, K. Toyota, R. Fukuda, J. Hasegawa, M. Ishida, T. Nakajima, Y. Honda, O. Kitao, H. Nakai, T. Vreven, K. Throssell, J. A. Montgomery, Jr., J. E. Peralta, F. Ogliaro, M. J. Bearpark, J. J. Heyd, E. N. Brothers, K. N. Kudin, V. N. Staroverov, T. A. Keith, R. Kobayashi, J. Normand, K. Raghavachari, A. P. Rendell, J. C. Burant, S. S. Iyengar, J. Tomasi, M. Cossi, J. M. Millam, M. Klene, C. Adamo, R. Cammi, J. W. Ochterski, R. L. Martin, K. Morokuma, O. Farkas, J. B. Foresman, and D. J. Fox, Gaussian, Inc., Wallingford CT, 2019.
